# Supplementary material for: COVID-19-related attitudes, risk perceptions, preventive behaviours and economic impact in sub-Saharan African countries: implementing a longitudinal phone-based survey protocol in rural Senegalese households
Source: PubMed Central journal article supplement — BMJ Open. 2021 Jul 16;11(7):e050090. doi: 10.1136/bmjopen-2021-050090 (PMC8288240; doi:10.1136/bmjopen-2021-050090), 2021-07-16
Supplement: bmjopen-2021-050090.draft_revisions.pdf [file bmjopen-2021-050090.draft_revisions.pdf]

# BMJ Open

BMJ Open is committed to open peer review. As part of this commitment we make the peer review history of every article we publish publicly available.

When an article is published we post the peer reviewers' comments and the authors' responses online. We also post the versions of the paper that were used during peer review. These are the versions that the peer review comments apply to.

The versions of the paper that follow are the versions that were submitted during the peer review process. They are not the versions of record or the final published versions. They should not be cited or distributed as the published version of this manuscript.

BMJ Open is an open access journal and the full, final, typeset and author-corrected version of record of the manuscript is available on our site with no access controls, subscription charges or pay-per-view fees (<http://bmjopen.bmj.com>).

If you have any questions on BMJ Open's open peer review process please email [info.bmjopen@bmj.com](mailto:info.bmjopen@bmj.com)

# BMJ Open

## COVID-19-related attitudes, risk perceptions, preventive behaviours and economic impact in Sub-Saharan African countries: Implementing a longitudinal phone-based survey protocol in rural Senegalese households

|                               |                                                                                                                                                                                                                                                                                                                                                                                                                                                                                                                                                                                                                                                                     |
|-------------------------------|---------------------------------------------------------------------------------------------------------------------------------------------------------------------------------------------------------------------------------------------------------------------------------------------------------------------------------------------------------------------------------------------------------------------------------------------------------------------------------------------------------------------------------------------------------------------------------------------------------------------------------------------------------------------|
| Journal:                      | <i>BMJ Open</i>                                                                                                                                                                                                                                                                                                                                                                                                                                                                                                                                                                                                                                                     |
| Manuscript ID                 | bmjopen-2021-050090                                                                                                                                                                                                                                                                                                                                                                                                                                                                                                                                                                                                                                                 |
| Article Type:                 | Protocol                                                                                                                                                                                                                                                                                                                                                                                                                                                                                                                                                                                                                                                            |
| Date Submitted by the Author: | 09-Feb-2021                                                                                                                                                                                                                                                                                                                                                                                                                                                                                                                                                                                                                                                         |
| Complete List of Authors:     | Seror, Valerie; INSERM, VITROME<br>Maradan, Gwenaëlle; INSERM, UMR912 (SESSTIM), 13006; Aix Marseille Université, UMR_S912, IRD, 13006<br>Ba, EH; Campus Universitaire de l'IRD<br>Cortaredona, Sebastien; INSERM, UMR912 "Economics and Social Sciences Applied to Health & Analysis of Medical Information" (SESSTIM); ORS PACA, Southeastern Health Regional Observatory<br>Berenger, Cyril; INSERM, UMR912 "Economics and Social Sciences Applied to Health & Analysis of Medical Information" (SESSTIM); ORS PACA, Southeastern Health Regional Observatory<br>L'Haridon, O; University of Rennes 1; CNRS<br>Sokhna, C; VITROME; Campus Universitaire de l'IRD |
| Keywords:                     | COVID-19, Public health < INFECTIOUS DISEASES, PUBLIC HEALTH, TROPICAL MEDICINE                                                                                                                                                                                                                                                                                                                                                                                                                                                                                                                                                                                     |
|                               |                                                                                                                                                                                                                                                                                                                                                                                                                                                                                                                                                                                                                                                                     |

SCHOLARONE™  
Manuscripts

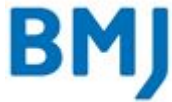

I, the Submitting Author has the right to grant and does grant on behalf of all authors of the Work (as defined in the below author licence), an exclusive licence and/or a non-exclusive licence for contributions from authors who are: i) UK Crown employees; ii) where BMJ has agreed a CC-BY licence shall apply, and/or iii) in accordance with the terms applicable for US Federal Government officers or employees acting as part of their official duties; on a worldwide, perpetual, irrevocable, royalty-free basis to BMJ Publishing Group Ltd ("BMJ") its licensees and where the relevant Journal is co-owned by BMJ to the co-owners of the Journal, to publish the Work in this journal and any other BMJ products and to exploit all rights, as set out in our [licence](#).

The Submitting Author accepts and understands that any supply made under these terms is made by BMJ to the Submitting Author unless you are acting as an employee on behalf of your employer or a postgraduate student of an affiliated institution which is paying any applicable article publishing charge ("APC") for Open Access articles. Where the Submitting Author wishes to make the Work available on an Open Access basis (and intends to pay the relevant APC), the terms of reuse of such Open Access shall be governed by a Creative Commons licence – details of these licences and which [Creative Commons](#) licence will apply to this Work are set out in our licence referred to above.

Other than as permitted in any relevant BMJ Author's Self Archiving Policies, I confirm this Work has not been accepted for publication elsewhere, is not being considered for publication elsewhere and does not duplicate material already published. I confirm all authors consent to publication of this Work and authorise the granting of this licence.

1  
2  
3 **COVID-19-related attitudes, risk perceptions, preventive**  
4  
5  
6 **behaviours and economic impact in Sub-Saharan African**  
7  
8  
9 **countries: Implementing a longitudinal phone-based survey**  
10  
11  
12 **protocol in rural Senegalese households**  
13  
14  
15  
16  
17

18 **Seror V<sup>1,2</sup>, Maradan G<sup>3</sup>, Ba EH<sup>4</sup>, Cortaredona S<sup>1,2</sup>, Berenger C<sup>3</sup>,**  
19  
20  
21 **L'Haridon O<sup>5,6</sup>, Sokhna C<sup>1,2,4</sup> and the CO3ELSER group**  
22  
23  
24  
25  
26  
27

28 <sup>1</sup> Aix Marseille Univ, IRD, AP-HM, SSA, VITROME, Marseille, France.

29 <sup>2</sup> IHU-Méditerranée Infection, Marseille, France.

30 <sup>3</sup> ORS PACA, Southeastern Health Regional Observatory, 13006, Marseille, France.

31 <sup>4</sup> VITROME, Campus Universitaire de l'IRD, Hann, Dakar, Senegal

32 <sup>5</sup> Faculty of Economics, University of Rennes 1, Rennes, France.

33 <sup>6</sup> Univ Rennes, CNRS, CREM UMR 6211, Rennes

34  
35  
36  
37  
38  
39  
40  
41  
42  
43  
44  
45 **Corresponding author:**

46 Valérie Seror  
47 VITROME  
48 IHU Méditerranée Infection  
49 19-21 bd Jean Moulin  
50 13005 Marseille  
51 Tel. +33413732412 valerie.seror@inserm.fr  
52  
53  
54  
55  
56  
57  
58  
59  
60

## Abstract

**Introduction.** Rural areas are considered safe havens against the increased spread of COVID-19 and associated restrictive measures, especially in contexts where public authorities are not in a position to systematically and substantially ease COVID-19-induced economic shocks. In the current Sub-Saharan Africa context, still marked by uncertainty surrounding the spread of COVID-19, we present the protocol of an ongoing longitudinal study aimed at investigating COVID-19-related attitudes, risks perceptions, preventive behaviours, and economic impact in rural areas in Senegal.

**Methods and analysis.** A prospective randomized longitudinal study of 600 households located in three semi-urban villages and nine randomly selected rural villages in the Niakhar area (located 135 km East of Dakar). Three ad hoc phone surveys are administered to 600 heads of households, their housewives in charge of managing the household and a relative living temporarily in the household, respectively. In addition to sharing identical sets of questions on several topics (risks perceptions, attitudes to curfew, attitudes to vaccines, beliefs about COVID-19 infection), the three separate survey questionnaires also include other topics (economic impact, local preventive strategies) whose related questions differ between questionnaires. As analysing evolutions is the study's primary focus, data on all the topics covered will be collected in three waves unless the spread of COVID-19 by mid-2021 justifies extending data collection. The present article presents the study protocol and details about the implementation of the first wave of data collection which started in July 2020. The decision to wait before presenting the protocol was based on the unprecedented context the COVID-19 pandemic.

**Ethics and dissemination.** The survey's protocol was approved by the Senegalese National Ethical Committee for Research in Health (131/MSAS/CNERS/Sec) and received authorisation from both the Senegalese Ministry of Health (619/MSAS/DPRS/DR) and the French Commission on Information Technology and Liberties (CNIL 2220771).

**Keywords:** COVID-19; attitudes; risk perceptions; preventive behaviours; economic impact; Sub-Saharan African ; longitudinal ; survey protocol.

## Article Summary

- The current Sub-Saharan African (SSA) context is still marked by uncertainty surrounding the spread of the COVID-19 pandemic and the scarce availability of individual data.
- This ongoing longitudinal study aims to investigate COVID-19-related attitudes, risk perceptions, preventive behaviours, and the economic impact in Senegalese rural areas.
- Three waves of data collection are planned (the first wave started in July 2020). However, this number may increase if the spread of COVID-19 by mid-2021 justifies extending data collection over a longer period of time.
- In the unprecedented context of the COVID-19 pandemic, the generalizability of the study's results needs to be explored.

## Introduction

After spreading from China to other Asian countries in late 2019, COVID-19 appeared in Western Europe in January 2020 where it rapidly led to overwhelmed hospitals and an exponential increase in deaths (COVID-19 data repository of the Johns Hopkins Center for Systems Science and Engineering, Baltimore, MD, USA). While most European countries adopted lockdown measures only several weeks after the first COVID-19 cases were reported (e.g., a 6-week delay in Italy and a 7-week delay in France), many Sub-Saharan African (SSA) countries decided to act sooner before the outbreak spread.

### **Spread of COVID-19 still limited in SSA, but uncertainties remain about how the pandemic will evolve**

The COVID-19 pandemic spread to SSA in February/March 2020. Senegal implemented restrictive measures (curfew, closing schools, banning of public gatherings, and cancellation of major national and religious celebrations) three weeks after the first COVID-19 cases had been reported in the country, whereas in Nigeria, a street publicity awareness campaign on COVID-19 preventive measures was launched in the capital Lagos, two days after the first cases had been identified. Concerns were expressed, especially in Senegal and Burkina Faso, with respect to the sharp increases in both these countries in the number of COVID-19 cases soon after the first cases were confirmed there <sup>1</sup>.

The announcements of restrictive measures led to mass movements of people from big cities to rural villages, both caused by fear of COVID-19 and the impact it could have in terms of economic losses. However, as time went by, it increasingly appeared that the outbreak was much less devastating than initially anticipated <sup>2</sup>, and the mass movements of people mentioned above were gradually reversed. Apart from the early adoption of restrictive measures, the most widely proposed hypothesis for the much lower spread of COVID-19 in SSA than in most other world regions is that different demographic characteristics (younger average ages, lower

1  
2  
3 population densities, and lower urbanization rates)<sup>3-6</sup>, and a higher immune response in relation  
4  
5 with more highly solicited immune systems<sup>7</sup> hamper the spread. Recently, another strong  
6  
7 hypothesis has been put forward, suggesting that the extensive implementation of local  
8  
9 preventive strategies may have played a crucial role in substantially lowering the spread of the  
10  
11 disease<sup>8,9</sup>.

12  
13  
14  
15 Nevertheless, the possibility cannot be ruled out that the COVID-19 pandemic could spread  
16  
17 throughout Sub-Saharan African countries<sup>2,10</sup>, as it did (and still continues to do) in North  
18  
19 African and European countries (i.e. in all the countries north of SSA (Johns Hopkins  
20  
21 Coronavirus world map:  
22  
23

24 <https://www.arcgis.com/apps/opsdashboard/index.html#/bda7594740fd40299423467b48e9ecf>

25  
26  
27 6). Such a development is of great concern because of the associated risk of overwhelming  
28  
29 already fragile healthcare systems<sup>1,11</sup>, in a context where the pandemic has brought about a  
30  
31 worldwide economic crisis whose consequences might be severe for Sub-Saharan Africa<sup>12</sup>.

### 32 33 34 **Few COVID-19 data are available from an individual perspective**

35  
36 Most published analyses to date on the COVID-19 pandemic in Sub-Saharan African countries  
37  
38 have not been supported by collected data, except for data on the numbers of confirmed cases  
39  
40 and deaths. Nevertheless, two studies assessed COVID-19-related knowledge, attitudes and  
41  
42 practices in Nigeria, and in both Ghana and South Africa, respectively. An online survey was  
43  
44 used in both studies (April-May 2020 and March-April 2020, respectively). Both showed that  
45  
46 personal COVID-19 prevention measures against COVID-19 and the disease's main symptoms  
47  
48 were well-known by study participants<sup>13,14</sup>. However, the Nigerian study also showed that  
49  
50 approximately half of the surveyed individuals believed that only elderly people with  
51  
52 comorbidities were likely to develop severe COVID-19, whereas 85% were unaware of the risk  
53  
54 of being infected by asymptomatic individuals. Consistent with this finding and given that the  
55  
56 participants in the Nigerian study were relatively young (69% aged between 21 and 30 years  
57  
58  
59  
60



1  
2  
3 old), only 22.5% of surveyed individuals reported wearing a face mask when they went out.  
4  
5 Furthermore, other published studies have emphasized individuals' fear of serious COVID-19-  
6  
7 related economic repercussions (notably people living in urban Ghanaian neighbourhoods with  
8  
9 their own business in the informal economy <sup>15</sup> and farmers working in the Ethiopian vegetable  
10  
11 sector <sup>16</sup>).

### 15 **Study Objectives**

17 The present ongoing study was designed in a setting marked by both uncertainty about the  
18  
19 spread of COVID-19 in Sub-Saharan Africa and the scarce availability of individual data. Given  
20  
21 the continued risk that the spread of COVID-19 will increase substantially in SSA, the memory  
22  
23 of mass movements of people from big cities in March 2020 highlights the role that rural areas  
24  
25 could play if such an event were to reoccur. This role could be major in a context where public  
26  
27 authorities may not be in a position to systematically and substantially ease the economic shock  
28  
29 induced by the pandemic<sup>17-19</sup>. While this role could evolve depending on rural populations'  
30  
31 attitudes to such mass movements as well as their perceptions of the associated risks, we  
32  
33 hypothesized that evaluating the evolution of individuals' perceived impact of COVID-19  
34  
35 pandemic could provide invaluable information about the potential pressure of the COVID-19  
36  
37 pandemic on these rural areas.  
38  
39  
40  
41  
42

43 Accordingly, the present ongoing longitudinal study was designed to investigate the attitudes,  
44  
45 risk perceptions and preventive behaviours of people living in a Senegalese rural area in terms  
46  
47 of COVID-19, as well as their perceptions of the related economic impact. As rural areas often  
48  
49 have limited access to the internet and given the increased risk of COVID-19 transmission  
50  
51 during close contact interactions, the only available option was to conduct a phone-based  
52  
53 survey.  
54  
55  
56

### 58 **Methods and analysis**

## Population

This study includes adults (18 years old and over) living in all 30 villages of the rural Niakhar area covered by the Niakhar Health and Demographic Surveillance System (HDSS)<sup>20</sup>. The Niakhar HDSS, which is the oldest HDSS in Senegal (created in 1962) and one of the oldest in Western Africa, gathers regular data for the population covered, including demographic and health data. The Niakhar area itself is located 135 km East of Dakar and covers 203 km<sup>2</sup> with a population of 50 355 inhabitants (January 2018 census). More specifically, it is located in the ‘department’ (an administrative area) of Fatick (there are 45 departments in Senegal) which covers three different healthcare districts (including the Niakhar healthcare district). Most of the population (96.4%) living in this area belongs to the Serere ethnic group. The main economic activity is agriculture with food cultivation (millet) and a cash crop (peanuts), in addition to small-scale cattle breeding.

## Representativeness of Niakhar area with respect to COVID-19

As the Niakhar area has been a site for research for several years, especially for infectology and epidemiology of infectious diseases, including malaria, meningitis and hepatitis<sup>20</sup>, the question arises as to how much the people living in the area are still truly representative of other Senegalese rural populations, especially regarding their knowledge of diseases that have long been studied there. However, given that COVID-19 is a new disease, we hypothesized that the Niakhar healthcare district would likely be comparable with other such districts in the country with a similar population density, age distribution and poverty index<sup>21</sup>.

To assess this hypothesis, we performed a multivariable Poisson regression on the numbers of confirmed COVID-19 cases at the district level (Senegalese Minister of Health: <http://www.sante.gouv.sn/Pr%2525C3%2525A9sentation/coronavirus-informations-officielles-et-quotidiennes-du-msas>). While standardized residuals represent variations in the data that cannot be explained by the model, residual plots enabled us to identify outliers (see

1  
2  
3 Appendix 1). As a result, the Niakhar healthcare district could not be considered an outlier in  
4 terms of the number of declared cases of COVID-19 (standardized residuals= -0.53).  
5  
6 Furthermore, at the time the study began, the prevalence of COVID-19 in the department of  
7  
8 Fatick was comparable with that in other Senegalese departments with similar population  
9  
10 densities (Figure 1).  
11  
12  
13

### 14 15 **Study design and procedure**

16  
17 Study participants were randomly selected using a two-stage stratified sampling design. All 30  
18  
19 villages in the Niakhar area were previously identified as rural (n=27) or semi-urban villages  
20  
21 (n=3), depending on their infrastructure and equipment <sup>20</sup>. The participating villages selected in  
22  
23 the first stage (n=12) of the present study comprised the three semi-urban villages and a simple  
24  
25 random sample of nine rural villages. In the second stage of sampling, 600 households from all  
26  
27 the 1756 households in these 12 participating villages were selected, again using simple random  
28  
29 sampling.  
30  
31  
32

33  
34 This figure of 600 households was not arrived at from a calculation to determine the optimal  
35  
36 number of households to be included, but was the result of a trade-off between the budgetary  
37  
38 and logistic constraints of surveying up to three members in each household (i.e., a potential  
39  
40 maximum of 1800 individuals) in three successive waves of data collection (the first wave  
41  
42 started on July 27, 2020). An attrition rate of 15% was anticipated, resulting in an estimated  
43  
44 500 surveyed households by the end of the third wave (scheduled for mid-2021). In the planned  
45  
46 analyses, potential selection bias will be assessed and reduced by using sampling weights  
47  
48 computed as reciprocals of the probabilities of selection of each household. Final weights will  
49  
50 be calculated using an iterative process (ranking ratio estimation) involving sociodemographic  
51  
52 data collected regularly by the Niakhar HDSS.  
53  
54  
55  
56

### 57 **Longitudinal phone survey in multi-adult households**

1  
2  
3 Data collection is expected to last at least until end-2021, unless the spread of COVID-19 at  
4 that time justifies extending data collection. The study is funded until March 2022 (Inserm-  
5 ANRS, grant number ECTZ147735). Given that any application for funding for possible  
6 subsequent waves of data collection needs to occur well in advance, the decision about this  
7 issue has been postponed until mid-2021. For each wave, data are collected by surveying  
8 participants over their mobile phone. Participants' telephone numbers were recorded by  
9 community health workers (Badjanou Gokh) prior to the first survey. Phone interviews are  
10 conducted using Computer assisted telephone interviews (CATI) software. To achieve higher  
11 response rates, 15 calls (1 initial and 14 callbacks) are planned at different times of the day and  
12 on different days before discarding a non-responsive telephone number.  
13  
14  
15  
16  
17  
18  
19  
20  
21  
22  
23  
24  
25

26 The COVID-19 sanitary context makes the implementation of the survey at each wave and the  
27 collection of data more complex than usual. Although this study protocol was the result of a  
28 close collaboration between Senegalese and French researchers, travelling restrictions  
29 prevented some of the latter from being physically present for the training of the CATI  
30 interviewers, for data collection preparatory meetings, for field meetings and for feedback  
31 sessions. Accordingly, the Senegalese research team is in charge of coordinating data collection  
32 and organizing CATI schedules, although regular internet-based meetings with the French  
33 research team ensure joint decision-making.  
34  
35  
36  
37  
38  
39  
40  
41  
42  
43  
44  
45

46 The lack of the possibility to train interviewers up on CATI in Senegal because of the  
47 international travel restrictions meant that only experienced bilingual (French and Serere)  
48 interviewers already present in Senegal could administer the CATI surveys. As Serere is an oral  
49 only language, practice sessions to administer the questionnaires were performed by the  
50 interviewers in order to reach a consensus on the specific words to be used when performing  
51 the interviews in Serere. Consequently, the relevance and ease of understanding of each  
52 questionnaire item was assessed before the interviews took place in Serere. A total of seven  
53  
54  
55  
56  
57  
58  
59  
60

1  
2  
3 interviewers collected data in the first wave. They were supervised by another senior  
4 interviewer whose specific role, in addition to supervision, was to share feedback on data  
5 collection with the two (Senegalese and French) research teams. In many aspects, the data  
6 collection process greatly benefits from long-term existing experience the interviewers have in  
7 administering research-based surveys.  
8  
9  
10  
11  
12  
13  
14

### 15 **Data collection**

16  
17 The first data collection wave began on July 27, 2020 and interviewing lasted six weeks.  
18 Furthermore, parallel data collection about local preventive strategies implemented in villages  
19 since July 2020 is about to be completed. Figure 2 summarizes the major steps of data collection  
20 and presents the study sample to be followed in our longitudinal design.  
21  
22  
23  
24  
25  
26

27 For the first wave, phone interviews took place with three different persons in each participating  
28 household as follows: the head of the household, his wife (for those who had more than one  
29 wife, the wife responsible for managing the household), and a relative from a city who had  
30 decided to come and live momentarily in the rural household because of the risk of COVID-19  
31 and the fear of associated economic consequences. Specifically, heads of households had to  
32 decide which wife and which temporary visiting relative would be surveyed, and to provide  
33 their names and mobile phone numbers during the first phone interview. When interviewing  
34 heads of households, their designated wives and visiting relatives on their mobile phones, the  
35 interviewers first presented the study and informed them about its longitudinal design, obtained  
36 their consent to participate, and then interviewed them. As a way of thanking households for  
37 their participation, the community health workers provided them with a personal protection kit  
38 including hydroalcoholic gel and a face mask at the end of the first wave of data collection.  
39  
40  
41  
42  
43  
44  
45  
46  
47  
48  
49  
50  
51  
52  
53  
54

55 As regards relatives temporarily living in the household, those individuals interviewed in the  
56 first wave of data collection will be surveyed in successive waves. New visiting relatives  
57 identified between two different waves of data collection will also be included in the study  
58  
59  
60

1  
2  
3 design by interviewing them in all data collection waves subsequent to their inclusion. As we  
4 wanted to ensure that our study design and protocol were feasible given current national and  
5 international restrictive measures due to COVID-19, we chose to wait until the first wave of  
6 data collection neared completion before presenting the study design here.  
7  
8  
9

## 10 11 12 13 **Questionnaires**

14  
15 Three questionnaires were constructed (one each) for the heads of the selected households, their  
16 designated wives in charge of managing the household, and their designated relative  
17 temporarily living with them. In addition to sharing identical sets of questions on several topics  
18 (risks perceptions, attitudes to curfew, attitudes to vaccines, beliefs about COVID-19 infection),  
19 the three separate survey questionnaires also contain other questions on other topics (economic  
20 impact, local preventive strategies). These questions differ between questionnaires. For  
21 example, with regard to local preventive strategies, household heads are asked about the local  
22 COVID-19 prevention strategies implemented in their village, while their wives are asked about  
23 anti-COVID-19 private prevention measures in the household, and newcomers about personal  
24 preventive measures in the household and possibly asked to implement when they first arrived  
25 (e.g., quarantine). While this study involves collecting data at different moments in time, the  
26 same topics and associated sets of questions presented below will be used throughout the study  
27 in order to evaluate evolutions.  
28  
29  
30  
31  
32  
33  
34  
35  
36  
37  
38  
39  
40  
41  
42  
43  
44

## 45 46 **Measures**

### 47 48 ***Sociodemographic characteristics***

49  
50 As the study's framework provides for collected data to be matched with existing data in the  
51 Niakhar HDSS <sup>20</sup> database, only individual sociodemographic data needs to be collected during  
52 the telephone interviews, including marital status, educational level, number of children, the  
53 latter's ages and type of schooling (public or religious school), as well as the respondent's level  
54 of access to the internet. With regard to employment at the time of the survey, participants are  
55  
56  
57  
58  
59  
60

1  
2  
3 invited to answer open-ended questions whose responses are consequently recoded into nine  
4  
5 different standard categories (Farmers, Craftsmen, Workers, Employees, Intermediate  
6  
7 professions, Managers and higher intellectual professions, Students, Pensioners, Not engaged  
8  
9 in active employment).

### 13 ***Risk perceptions***

15 Collecting data on the perceived risks of COVID-19 is of crucial importance in understanding  
16  
17 individuals' related attitudes and behaviours. In line with previous survey studies, the  
18  
19 assessment of risk perceptions in the present study involves collecting information on  
20  
21 introspective judgements<sup>22,23</sup>. After asking surveyed individuals whether they have heard about  
22  
23 COVID-19 pandemic before being surveyed, an assessment is performed using a scale from 0  
24  
25 (not at all) to 10 (extremely) to measure how worried they are about getting the disease, and  
26  
27 how contagious and severe they perceive it to be<sup>24</sup>. In addition, perceived mortality of COVID-  
28  
29 19 is assessed based on a question about what the participant believes will be the number of  
30  
31 deaths out of every 100 people with COVID-19. To provide greater insight into participants'  
32  
33 COVID-19 risk perceptions, all the questions mentioned above are asked again for malaria, a  
34  
35 well-known and common viral infection in Sub-Saharan African countries which also starts  
36  
37 with flu-like symptoms.

38  
39 Finally, respondents are invited to self-assess their perceived absolute and relative risks of  
40  
41 COVID-19 infection<sup>25</sup> by ranking their level of self-perceived risk (four-point Likert scale  
42  
43 from "very low" (=1) to "very high" (=4)) and by positioning their own perceived risks with  
44  
45 respect to others of the same age and gender (five-point Likert scale from "much lower" (=1)  
46  
47 to "much higher" (=5)). The questionnaires also include items measuring the extent of the  
48  
49 respondent's fear that the visiting relative is unknowingly infected with COVID-19 and  
50  
51 asymptomatic.  
52  
53  
54  
55  
56  
57  
58  
59  
60

1  
2  
3 Other questionnaire items assessing risk perceptions include asking heads of households (/their  
4 surveyed wife) to adopt their spouse's perspective and to report the extent to which they believe  
5 their spouse is worried about COVID-19. Similarly, both individuals are asked to report the  
6 extent to which they believe their spouse perceives that she (/he) is at risk of COVID-19 and  
7 how she (/he) places this level of perceived risk in relation to that of other wives (/husbands) of  
8 the same age and gender. Accounting for the potential impact of respondents' current health  
9 state on their perceived risks, respondents are asked how they feel in terms of their state of  
10 health at the time of the survey (eleven-point Likert scale from "very poor" (=0) to "very well"  
11 (=10)).  
12  
13  
14  
15  
16  
17  
18  
19  
20  
21  
22  
23  
24

### 25 ***Attitudes***

26  
27 Given the unprecedented context of COVID-19 pandemic, assessing individual attitudes to the  
28 disease necessitates using ad-hoc questions. Considering the restrictive measures adopted in  
29 Senegal from March 2020 onward, attitudes to curfews in general, whether implemented in  
30 rural or urban areas are assessed in the present study. With regard to health issues, surveyed  
31 individuals are invited to report how worried they are about buying counterfeit drugs, their  
32 attitudes to vaccination in general and to (unavailable at the time of the first wave of data  
33 collection) the anti-COVID-19 vaccine. In addition, participants are asked whether they would  
34 consider having anti-COVID-19 vaccine for themselves and for their children if it were free of  
35 charge (four-point Likert scale from "certainly yes" (=1) to "definitely not" (=4) in all cases).  
36  
37 Finally, individuals' agreement (agree/disagree) is assessed regarding statements circulating on  
38 the internet and reflecting rumour-related fake information on COVID-19 transmission and  
39 cure.  
40  
41  
42  
43  
44  
45  
46  
47  
48  
49  
50  
51  
52  
53

### 54 ***Preventive behaviours***

55  
56 It has been recently suggested that locally implemented COVID-19 preventive strategies could  
57 potentially explain, at least in part, the as yet slow spread of COVID-19 in SSA <sup>8 9</sup>. The present  
58  
59  
60



1  
2  
3 study collected data which could shed some more light on this issue. In our ongoing longitudinal  
4  
5 study, preventive behaviours cover individual protection measures by the study's participants  
6  
7 and collective prevention strategies implemented by administrative, religious or medical  
8  
9 authorities in the area covered by the survey. With regard to the former, the study's  
10  
11 questionnaires include items measuring how much the COVID-19 pandemic had led to changes  
12  
13 in everyday life in the participating households, in changes in journeys to and from the local  
14  
15 market or the closest city, and in changes in the way relatives from cities are welcomed,  
16  
17 especially in terms of possible quarantine upon their arrival. In order to compare participant  
18  
19 recall with objective data on locally implemented collective preventive strategies, from the  
20  
21 outset of the study, specific data has been gathered to document the dates, duration and nature  
22  
23 of all collective actions implemented by local authorities in the study's 12 study villages. These  
24  
25 data will continue to be collected over the whole data collection period.  
26  
27  
28  
29

### 30 31 ***Economic impact on everyday life*** 32

33 One primary concern about the spread of COVID-19 in Sub-Saharan African countries is a  
34  
35 possible resulting economic shock<sup>12 17-19</sup>. Supposing that urban areas would most likely be the  
36  
37 first to be highly impacted by the COVID-19 pandemic, rural areas could indeed be in position  
38  
39 to soften, at least in part, the economic consequences of COVID-19 pandemic. In this respect,  
40  
41 our ongoing study assesses the pandemic's impact with questions about the main  
42  
43 sociodemographic characteristics of relatives from cities currently living in the household  
44  
45 because of COVID-19, and questions about the perceived burden on the rural household (e.g.,  
46  
47 having to provide food for more people) as well as the benefits (e.g., larger labour force for  
48  
49 agricultural work) associated with their arrival in the household. In addition, the study examines  
50  
51 possible assistance from administrative authorities or neighbours locally implemented, as well  
52  
53 as possible assistance given to neighbours because of the COVID-19 pandemic. Furthermore,  
54  
55 possible COVID-19 pandemic-related financial difficulties are explored concerning everyday  
56  
57  
58  
59  
60

1  
2  
3 purchases and sales of crops in local markets. Finally, relatives from cities temporarily living  
4  
5 in the household because of their fear of COVID-19 and induced economic losses are asked to  
6  
7 self-assess the extent to which the pandemic has impacted their own life as well as everyday  
8  
9 life in the household. In terms of financial support provided to the household, heads of  
10  
11 households are asked about those relatives currently living with them and whether these  
12  
13 relatives provided support before they arrived to temporarily stay. Similarly, they are asked  
14  
15 about the extent to which relatives who left the household to go back to cities currently  
16  
17 financially support the household.  
18  
19  
20  
21

## 22 **Ethics and dissemination**

23  
24 COVID-19 is currently (as of February 2021) spreading relatively slowly in SSA although a  
25  
26 sharp increase in its spread cannot be excluded. Given the current context, the present ongoing  
27  
28 longitudinal study protocol aims to provide data on the attitudinal, behavioural and economic  
29  
30 consequences of the disease in a rural area in Senegal at a time when very few data are available.  
31  
32 Since rural areas may likely be seen as safe refuges, our study collects data from heads of rural  
33  
34 households, their wives (in charge of managing the household) and relatives who leave cities  
35  
36 to temporarily live in these households, specifically because of the COVID-19 pandemic. The  
37  
38 study protocol was approved by the Senegalese National Ethical Committee for Research in  
39  
40 Health (131/MSAS/CNERS/Sec) and received authorisation from the Senegalese Ministry of  
41  
42 Health (619/MSAS/DPRS/DR) and the French Commission on Information Technology and  
43  
44 Liberties (CNIL 2220771).  
45  
46  
47  
48  
49

50  
51 As regards the COVID-19 preventive strategies implemented at the village and household  
52  
53 levels, it is possible that the experience gained from the Ebola and HIV/AIDS pandemics have  
54  
55 helped in managing the risk of COVID-19<sup>10</sup>. In the present study, we hypothesize that accurate  
56  
57 recall of local prevention strategies currently in place is higher in villages with more prevention  
58  
59 strategies implemented. We also hypothesized that implementing preventive strategies at the  
60

1  
2  
3 village level might have a positive impact on adopting strategies at the household level.  
4  
5 Exploring the relationship between collective and individual preventive behaviours could be  
6  
7 very useful to evaluate the impact of locally implemented prevention measures on slowing the  
8  
9 spread of COVID-19. Using prospectively collected data, the dynamics of this relationship can  
10  
11 therefore be analysed over time with respect to attitudes and risk perceptions.  
12  
13

14  
15 To conclude, this ongoing study benefits greatly from close previously established research  
16  
17 relationships between the researchers and the interviewers involved. Now that data collection  
18  
19 for the first wave is nearing completion, and that data collection has been proven to be feasible  
20  
21 despite COVID-19 restrictions, we believe that the primary benefit of our longitudinal design  
22  
23 will be to provide data which could help to analyse evolutions in risk perceptions, attitudes, and  
24  
25 preventive behaviours of the disease, as well as its economic impact on everyday lives.  
26  
27

## 28 29 30 **Acknowledgements**

31  
32 We would like to thank the interviewers involved in the study, i.e. Modou DIOME, Cheikh  
33  
34 DIOUF, Ndèye Selbé DIOUF, Moussa GUEYE, Fadiène NDIAYE, Mayé NDOUR, Coumba  
35  
36 Sandiane SENE, Natalie TINE. Finally, our thanks to Jude Sweeney (Milan, Italy) for the  
37  
38 English revision and editing of our manuscript.  
39  
40

## 41 42 43 **Group Information**

44  
45 Members of the CO3ELSER Study Group are Elhadji Ba ; Assane Ndiaye ; Cheikh Sokhna  
46  
47 (UMR VITROME, IRD-Université Aix Marseille, AP-HM, SSA, IHU-Méditerranée Infection,  
48  
49 Marseille, France, and Campus International, IRD-UCAD de l'IRD, Dakar, Sénégal) Cyril  
50  
51 Berenger, Gwenaëlle Maradan (ORS PACA, Southeastern Health Regional Observatory,  
52  
53 13006, Marseille, France), Valerie Seror, Sebastien Cortaredona, Patrick Peretti-Watel (Aix  
54  
55 Marseille Univ, IRD, AP-HM, SSA, VITROME, Marseille, France, IHU-Méditerranée  
56  
57 Infection, Marseille, France), Olivier L'Haridon (Faculty of Economics, University of Rennes  
58  
59  
60

1  
2  
3 1, Univ Rennes, CNRS, CREM UMR 6211, Rennes, France), Jocelyn Raude (EHESP School  
4  
5 of Public Health, Rennes, France).  
6  
7

## 8 **References**

9

- 10  
11 1. Martinez-Alvarez M, Jarde A, Usuf E, et al. COVID-19 pandemic in west Africa. *Lancet*  
12 *Glob Health* 2020;8(5):e631-e32. doi: 10.1016/S2214-109X(20)30123-6 [published  
13 Online First: 2020/04/05]  
14  
15  
16 2. Sun H, Dickens BL, Cook AR, et al. Importations of COVID-19 into African countries and  
17 risk of onward spread. *BMC Infect Dis* 2020;20(1):598. doi: 10.1186/s12879-020-  
18 05323-w [published Online First: 2020/08/15]  
19  
20  
21 3. Cabore JW, Karamagi HC, Kipruto H, et al. The potential effects of widespread community  
22 transmission of SARS-CoV-2 infection in the World Health Organization African  
23 Region: a predictive model. *BMJ Glob Health* 2020;5(5) doi: 10.1136/bmjgh-2020-  
24 002647 [published Online First: 2020/05/27]  
25  
26  
27 4. Diop BZ, Ngom M, Pougue Biyong C, et al. The relatively young and rural population may  
28 limit the spread and severity of COVID-19 in Africa: a modelling study. *BMJ Glob*  
29 *Health* 2020;5(5) doi: 10.1136/bmjgh-2020-002699 [published Online First:  
30 2020/05/27]  
31  
32  
33 5. Ghisolfi S, Almas I, Sandefur JC, et al. Predicted COVID-19 fatality rates based on age, sex,  
34 comorbidities and health system capacity. *BMJ Glob Health* 2020;5(9) doi:  
35 10.1136/bmjgh-2020-003094 [published Online First: 2020/09/12]  
36  
37  
38 6. Nguimkeu P, Tadadjeu S. Why is the number of COVID-19 cases lower than expected in  
39 Sub-Saharan Africa? A cross-sectional analysis of the role of demographic and  
40 geographic factors. *World Dev* 2021;138:105251. doi:  
41 10.1016/j.worlddev.2020.105251 [published Online First: 2020/10/28]  
42  
43  
44 7. Netea MG, Dominguez-Andres J, Barreiro LB, et al. Defining trained immunity and its role  
45 in health and disease. *Nat Rev Immunol* 2020;20(6):375-88. doi: 10.1038/s41577-020-  
46 0285-6 [published Online First: 2020/03/07]  
47  
48  
49 8. Colebunders R, Siewe Fodjo JN, Vanham G, et al. A call for strengthened evidence on  
50 targeted, non-pharmaceutical interventions against COVID-19 for the protection of  
51 vulnerable individuals in sub-Saharan Africa. *Int J Infect Dis* 2020;99:482-84. doi:  
52 10.1016/j.ijid.2020.08.060 [published Online First: 2020/08/31]  
53  
54  
55  
56  
57  
58  
59  
60

- 1  
2  
3 9. Evans MV, Garchitorena A, Rakotonanahary RJL, et al. Reconciling model predictions with  
4 low reported cases of COVID-19 in Sub-Saharan Africa: insights from Madagascar.  
5 *Glob Health Action* 2020;13(1):1816044. doi: 10.1080/16549716.2020.1816044  
6 [published Online First: 2020/10/06]  
7  
8
- 9  
10 10. Payne C. COVID-19 in Africa. *Nat Hum Behav* 2020;4(5):436-37. doi: 10.1038/s41562-  
11 020-0870-5 [published Online First: 2020/04/05]  
12
- 13 11. Paintsil E. COVID-19 threatens health systems in sub-Saharan Africa: the eye of the  
14 crocodile. *J Clin Invest* 2020;130(6):2741-44. doi: 10.1172/JCI138493 [published  
15 Online First: 2020/04/01]  
16
- 17 12. Ataguba JE. COVID-19 Pandemic, a War to be Won: Understanding its Economic  
18 Implications for Africa. *Appl Health Econ Health Policy* 2020;18(3):325-28. doi:  
19 10.1007/s40258-020-00580-x [published Online First: 2020/04/07]  
20
- 21 13. Adesegun OA, Binuyo T, Adeyemi O, et al. The COVID-19 Crisis in Sub-Saharan Africa:  
22 Knowledge, Attitudes, and Practices of the Nigerian Public. *Am J Trop Med Hyg*  
23 2020;103(5):1997-2004. doi: 10.4269/ajtmh.20-0461 [published Online First:  
24 2020/09/26]  
25
- 26 14. Reddy SP, Sewpaul R, Mabaso M, et al. South Africans' understanding of and response to  
27 the COVID-19 outbreak: An online survey. *S Afr Med J* 2020;110(9):894-902.  
28 [published Online First: 2020/09/04]  
29
- 30 15. Durizzo K, Asiedu E, Van der Merwe A, et al. Managing the COVID-19 pandemic in poor  
31 urban neighborhoods: The case of Accra and Johannesburg. *World Dev*  
32 2021;137:105175. doi: 10.1016/j.worlddev.2020.105175 [published Online First:  
33 2020/09/10]  
34
- 35 16. Minten B, Mohammed B, Tamru S. Emerging Medium-Scale Tenant Farming, Gig  
36 Economies, and the COVID-19 Disruption: The Case of Commercial Vegetable  
37 Clusters in Ethiopia. *Eur J Dev Res* 2020:1-28. doi: 10.1057/s41287-020-00315-7  
38 [published Online First: 2020/10/27]  
39
- 40 17. Amewu S, Asante S, Pauw K, et al. The Economic Costs of COVID-19 in Sub-Saharan  
41 Africa: Insights from a Simulation Exercise for Ghana. *Eur J Dev Res* 2020:1-26. doi:  
42 10.1057/s41287-020-00332-6 [published Online First: 2020/11/05]  
43
- 44 18. Haider N, Osman AY, Gadzekpo A, et al. Lockdown measures in response to COVID-19  
45 in nine sub-Saharan African countries. *BMJ Glob Health* 2020;5(10) doi:  
46 10.1136/bmjgh-2020-003319 [published Online First: 2020/10/09]  
47  
48  
49  
50  
51  
52  
53  
54  
55  
56  
57  
58  
59  
60

- 1  
2  
3 19. Renzaho AMN. The Need for the Right Socio-Economic and Cultural Fit in the COVID-19  
4 Response in Sub-Saharan Africa: Examining Demographic, Economic Political, Health,  
5 and Socio-Cultural Differentials in COVID-19 Morbidity and Mortality. *Int J Environ*  
6 *Res Public Health* 2020;17(10) doi: 10.3390/ijerph17103445 [published Online First:  
7 2020/05/21]  
8  
9  
10  
11 20. Delaunay V, Douillot L, Diallo A, et al. Profile: the Niakhar Health and Demographic  
12 Surveillance System. *Int J Epidemiol* 2013;42(4):1002-11. doi: 10.1093/ije/dyt100  
13 [published Online First: 2013/09/26]  
14  
15  
16 21. Khaliloulah I. Accessibilité géographique des structures sanitaires au Sénégal. *Annales des*  
17 *sciences de la santé* 2017;1(10):10-25.  
18  
19  
20 22. Carman KG, Kooreman P. Probability perceptions and preventive health care. *J Risk*  
21 *Uncertain* 2014;49(1):43-71.  
22  
23  
24 23. Viscusi WK. Do smokers underestimate risks? *J Polit Econ* 1990;98(6):1253-56.  
25  
26 24. Ibuka Y, Chapman GB, Meyers LA, et al. The dynamics of risk perceptions and  
27 precautionary behavior in response to 2009 (H1N1) pandemic influenza. *BMC Infect*  
28 *Dis* 2010;10:296. doi: 10.1186/1471-2334-10-296 [published Online First: 2010/10/16]  
29  
30 25. Malenka DJ, Baron JA, Johansen S, et al. The framing effect of relative and absolute risk.  
31 *J Gen Intern Med* 1993;8(10):543-8. doi: 10.1007/BF02599636 [published Online First:  
32 1993/10/01]  
33  
34  
35  
36  
37  
38  
39  
40  
41  
42  
43  
44  
45  
46  
47  
48  
49  
50  
51  
52  
53  
54  
55  
56  
57  
58  
59  
60

1  
2  
3 **Authors' contributions:** VS and CS conceptualised the study and obtained funding. GM, E-  
4 HB, OLH and SC contributed to the development of the study design. GM, E-HB, and CB were  
5 responsible for the development of the data collection platform, field testing of the study  
6 logistics, and participant recruitment. VS, CS, GM, OLH and SC drafted the first version of the  
7 manuscript. All authors read, edited and approved the final version.  
8  
9

10  
11  
12  
13  
14  
15 **Funding statement:** This work is supported by the French National Institute for Health and  
16 Medical Research-French National Agency for Aids and Viral Hepatitis Research (Inserm-  
17 ANRS, grant number ECTZ147735).  
18  
19

20  
21  
22  
23 **Competing interests statement.** No competing interests to declare.  
24

25  
26 **Word Count:** 3830 words.  
27  
28  
29  
30  
31  
32  
33  
34  
35  
36  
37  
38  
39  
40  
41  
42  
43  
44  
45  
46  
47  
48  
49  
50  
51  
52  
53  
54  
55  
56  
57  
58  
59  
60

Figure 1. Number of COVID-19 confirmed cases at the department level (n=45)

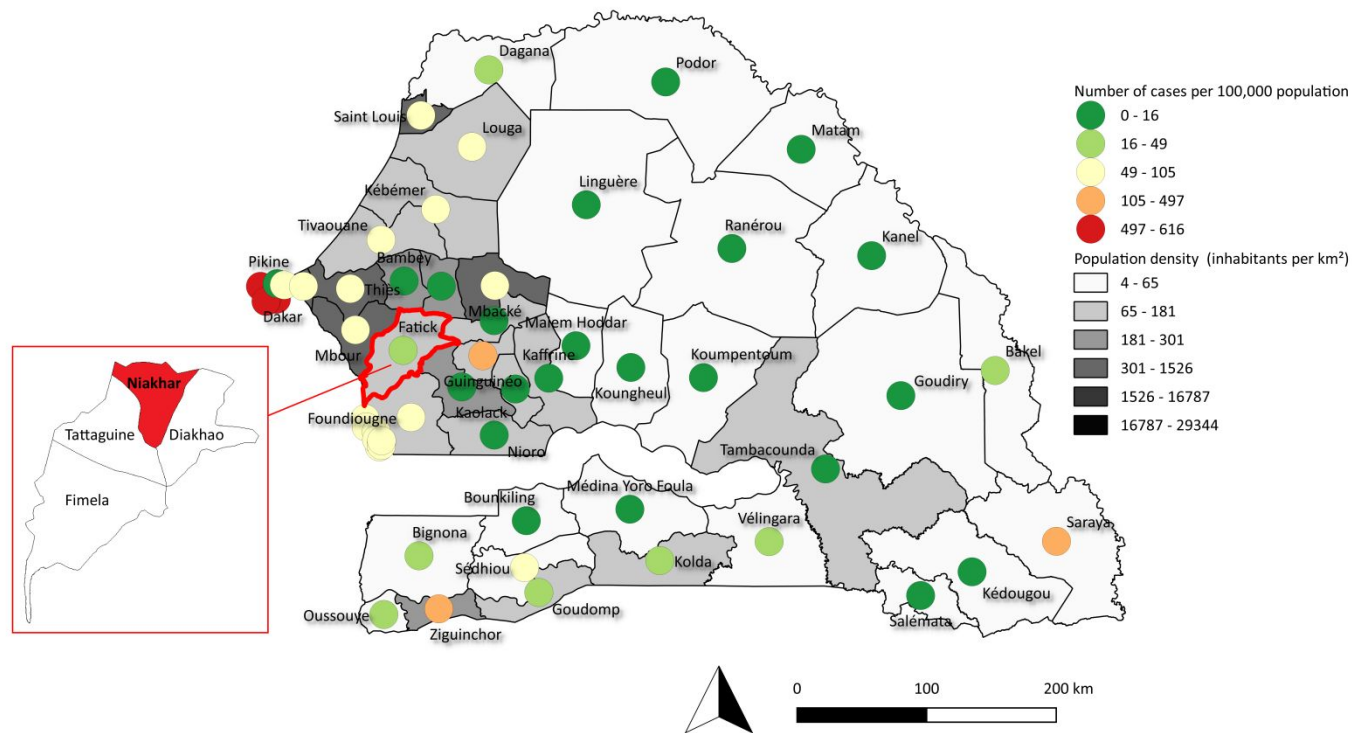

Source: <http://www.sante.gouv.sn/Pr%2525C3%2525A9sentation/coronavirus-informations-officielles-et-quotidiennes-du-msas>; data accessed on November 26, 2020.

Note: The administrative ‘department’ of Fatick covers different healthcare districts, including the Niakhar healthcare district).



Figure 2. Study flow diagram

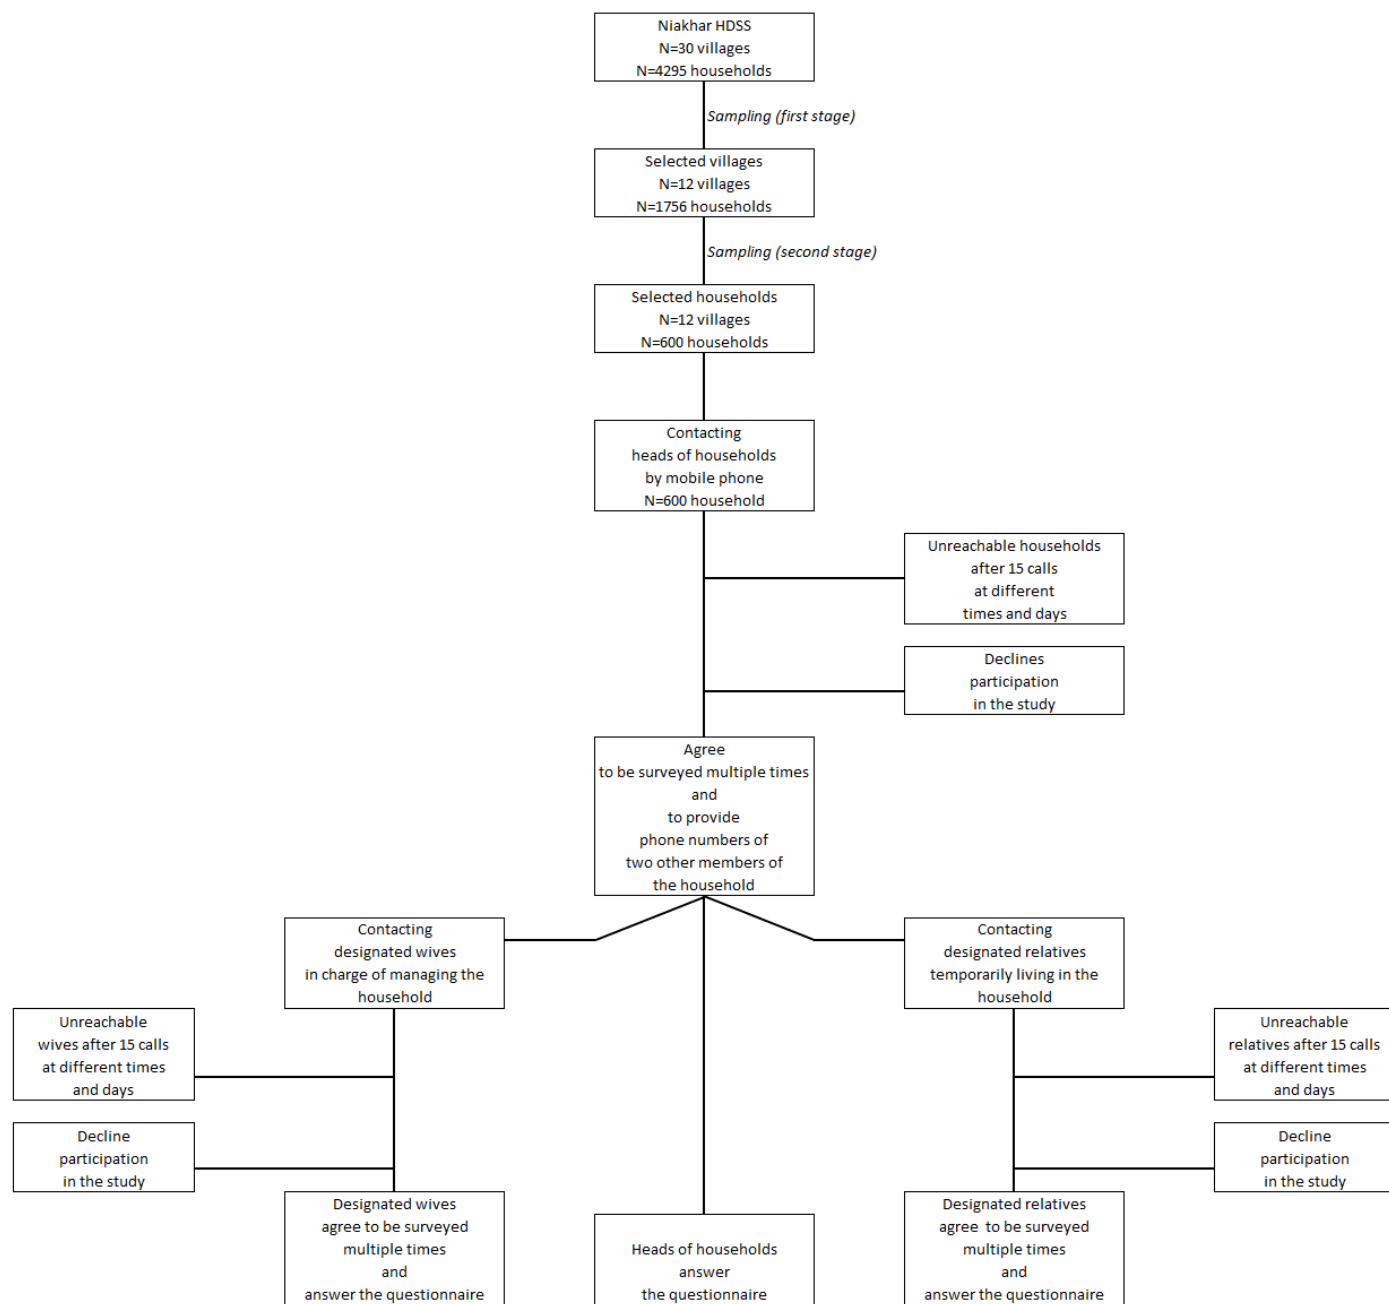

Note: Mobile phone numbers provided by community health workers (Badjanou Gokh).

**Appendix 1. Multivariable Poisson regression at the district level and residual dependence plot (n=79).**

- Outcome: number of confirmed COVID-19 cases at the healthcare district level (data accessed on November 26, 2020: <http://www.sante.gouv.sn/Pr%2525C3%2525A9sentation/coronavirus-informations-officielles-et-quotidiennes-du-msas>)
- Offset: total population of the healthcare district
- Covariates:
  - Urbanization rates (%)
  - Poverty index (%)
  - Rates of people aged 50 and older (%)

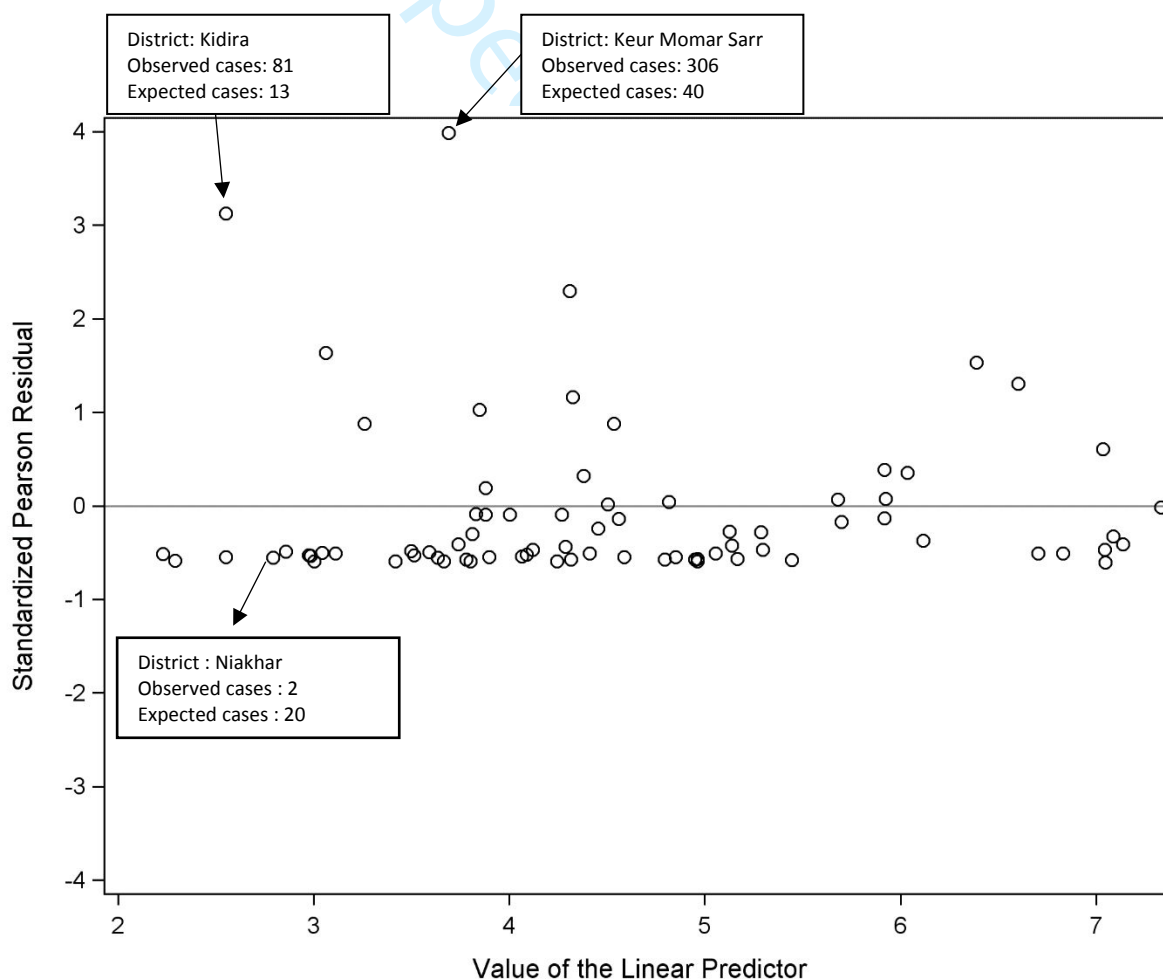

# BMJ Open

## COVID-19-related attitudes, risk perceptions, preventive behaviours and economic impact in Sub-Saharan African countries: Implementing a longitudinal phone-based survey protocol in rural Senegalese households

|                                 |                                                                                                                                                                                                                                                                                                                                                                                                                                                                                                                                                                                                                                                   |
|---------------------------------|---------------------------------------------------------------------------------------------------------------------------------------------------------------------------------------------------------------------------------------------------------------------------------------------------------------------------------------------------------------------------------------------------------------------------------------------------------------------------------------------------------------------------------------------------------------------------------------------------------------------------------------------------|
| Journal:                        | <i>BMJ Open</i>                                                                                                                                                                                                                                                                                                                                                                                                                                                                                                                                                                                                                                   |
| Manuscript ID                   | bmjopen-2021-050090.R1                                                                                                                                                                                                                                                                                                                                                                                                                                                                                                                                                                                                                            |
| Article Type:                   | Protocol                                                                                                                                                                                                                                                                                                                                                                                                                                                                                                                                                                                                                                          |
| Date Submitted by the Author:   | 18-Apr-2021                                                                                                                                                                                                                                                                                                                                                                                                                                                                                                                                                                                                                                       |
| Complete List of Authors:       | Seror, Valerie; INSERM, VITROME Maradan, Gwenaëlle; INSERM, UMR912 (SESSTIM), 13006; Aix Marseille Université, UMR_S912, IRD, 13006 Ba, EH; Campus Universitaire de l'IRD Cortaredona, Sebastien; INSERM, UMR912 "Economics and Social Sciences Applied to Health & Analysis of Medical Information" (SESSTIM); ORS PACA, Southeastern Health Regional Observatory Berenger, Cyril; INSERM, UMR912 "Economics and Social Sciences Applied to Health & Analysis of Medical Information" (SESSTIM); ORS PACA, Southeastern Health Regional Observatory L'Haridon, O; University of Rennes 1; CNRS Sokhna, C; VITROME; Campus Universitaire de l'IRD |
| <b>Primary Subject Heading</b>: | Public health                                                                                                                                                                                                                                                                                                                                                                                                                                                                                                                                                                                                                                     |
| Secondary Subject Heading:      | Global health, Health economics                                                                                                                                                                                                                                                                                                                                                                                                                                                                                                                                                                                                                   |
| Keywords:                       | COVID-19, Public health < INFECTIOUS DISEASES, PUBLIC HEALTH, TROPICAL MEDICINE, HEALTH ECONOMICS                                                                                                                                                                                                                                                                                                                                                                                                                                                                                                                                                 |
|                                 |                                                                                                                                                                                                                                                                                                                                                                                                                                                                                                                                                                                                                                                   |

SCHOLARONE™  
Manuscripts



I, the Submitting Author has the right to grant and does grant on behalf of all authors of the Work (as defined in the below author licence), an exclusive licence and/or a non-exclusive licence for contributions from authors who are: i) UK Crown employees; ii) where BMJ has agreed a CC-BY licence shall apply, and/or iii) in accordance with the terms applicable for US Federal Government officers or employees acting as part of their official duties; on a worldwide, perpetual, irrevocable, royalty-free basis to BMJ Publishing Group Ltd ("BMJ") its licensees and where the relevant Journal is co-owned by BMJ to the co-owners of the Journal, to publish the Work in this journal and any other BMJ products and to exploit all rights, as set out in our [licence](#).

The Submitting Author accepts and understands that any supply made under these terms is made by BMJ to the Submitting Author unless you are acting as an employee on behalf of your employer or a postgraduate student of an affiliated institution which is paying any applicable article publishing charge ("APC") for Open Access articles. Where the Submitting Author wishes to make the Work available on an Open Access basis (and intends to pay the relevant APC), the terms of reuse of such Open Access shall be governed by a Creative Commons licence – details of these licences and which [Creative Commons](#) licence will apply to this Work are set out in our licence referred to above.

Other than as permitted in any relevant BMJ Author's Self Archiving Policies, I confirm this Work has not been accepted for publication elsewhere, is not being considered for publication elsewhere and does not duplicate material already published. I confirm all authors consent to publication of this Work and authorise the granting of this licence.

1  
2  
3  
4  
5  
6  
7  
8  
9  
10  
11  
12  
13  
14  
15  
16  
17  
18  
19  
20  
21  
22  
23  
24  
25  
26  
27  
28  
29  
30  
31  
32  
33  
34  
35  
36  
37  
38  
39  
40  
41  
42  
43  
44  
45  
46  
47  
48  
49  
50  
51  
52  
53  
54  
55  
56  
57  
58  
59  
60

**COVID-19-related attitudes, risk perceptions, preventive behaviours and economic impact in Sub-Saharan African countries: Implementing a longitudinal phone-based survey protocol in rural Senegalese households**

**Seror V<sup>1,2</sup>, Maradan G<sup>3</sup>, Ba EH<sup>4</sup>, Cortaredona S<sup>1,2</sup>, Berenger C<sup>3</sup>, L'Haridon O<sup>5,6</sup>, Sokhna C<sup>1,2,4</sup> and the CO3ELSER group**

<sup>1</sup> Aix Marseille Univ, IRD, AP-HM, SSA, VITROME, Marseille, France.

<sup>2</sup> IHU-Méditerranée Infection, Marseille, France.

<sup>3</sup> ORS PACA, Southeastern Health Regional Observatory, 13006, Marseille, France.

<sup>4</sup> VITROME, Campus Universitaire de l'IRD, Hann, Dakar, Senegal

<sup>5</sup> Faculty of Economics, University of Rennes 1, Rennes, France.

<sup>6</sup> Univ Rennes, CNRS, CREM UMR 6211, Rennes

**Corresponding author:**

Valérie Seror  
VITROME  
IHU Méditerranée Infection  
19-21 bd Jean Moulin  
13005 Marseille  
Tel. +33413732412 valerie.seror@inserm.fr

## Abstract

**Introduction.** Rural areas are considered safe havens against the increased spread of COVID-19 and associated restrictive measures, especially in contexts where public authorities are not in a position to systematically and substantially ease COVID-19-induced economic shocks. In the current Sub-Saharan Africa context, still marked by uncertainty surrounding the spread of COVID-19, we present the protocol of an ongoing longitudinal study aimed at investigating COVID-19-related attitudes, risks perceptions, preventive behaviours, and economic impact in rural areas in Senegal.

**Methods and analysis.** A prospective randomized longitudinal study of 600 households located in three semi-urban villages and nine randomly selected rural villages in the Niakhar area (located 135 km East of Dakar). Three ad hoc phone surveys are administered to 600 heads of households, their housewives in charge of managing the household and a relative living temporarily in the household, respectively. In addition to sharing identical sets of questions on several topics (risks perceptions, attitudes to curfew, attitudes to vaccines, beliefs about COVID-19 infection), the three separate survey questionnaires also include other topics (economic impact, local preventive strategies) whose related questions differ between questionnaires. As analysing evolutions is the study's primary focus, data on all the topics covered will be collected in three waves unless the spread of COVID-19 by mid-2021 justifies extending data collection. The present article presents the study protocol and details about the implementation of the first wave of data collection which started in July 2020. The decision to wait before presenting the protocol was based on the unprecedented context the COVID-19 pandemic.

**Ethics and dissemination.** The survey's protocol was approved by the Senegalese National Ethical Committee for Research in Health (131/MSAS/CNERS/Sec) and received authorisation from both the Senegalese Ministry of Health (619/MSAS/DPRS/DR) and the French Commission on Information Technology and Liberties (CNIL 2220771).

**Keywords:** COVID-19; attitudes; risk perceptions; preventive behaviours; economic impact; Sub-Saharan African ; longitudinal ; survey protocol.

## Article Summary

- The current Sub-Saharan African (SSA) context is still marked by uncertainty surrounding the spread of the COVID-19 pandemic and the scarce availability of individual data.
- This ongoing longitudinal study aims to investigate COVID-19-related attitudes, risk perceptions, preventive behaviours, and the economic impact in Senegalese rural areas.
- Three waves of data collection are planned (the first wave started in July 2020). However, this number may increase if the spread of COVID-19 by mid-2021 justifies extending data collection over a longer period of time.
- In the unprecedented context of the COVID-19 pandemic, the generalizability of the study's results needs to be explored.

## Introduction

After spreading from China to other Asian countries in late 2019, COVID-19 appeared in Western Europe in January 2020 where it rapidly led to overwhelmed hospitals and an exponential increase in deaths (COVID-19 data repository of the Johns Hopkins Center for Systems Science and Engineering, Baltimore, MD, USA). While most European countries adopted lockdown measures only several weeks after the first COVID-19 cases were reported (e.g., a 6-week delay in Italy and a 7-week delay in France), many Sub-Saharan African (SSA) countries decided to act sooner before the outbreak spread.

### **Spread of COVID-19 still limited in SSA, but uncertainties remain about how the pandemic will evolve**

The COVID-19 pandemic spread to SSA in February/March 2020. Senegal implemented restrictive measures (curfew, closing schools, banning of public gatherings, and cancellation of major national and religious celebrations) three weeks after the first COVID-19 cases had been reported in the country, whereas in Nigeria, a street publicity awareness campaign on COVID-19 preventive measures was launched in the capital Lagos, two days after the first cases had been identified. Concerns were expressed, especially in Senegal and Burkina Faso, with respect to the sharp increases in both these countries in the number of COVID-19 cases soon after the first cases were confirmed there <sup>1</sup>.

The announcements of restrictive measures led to mass movements of people from big cities to rural villages, both caused by fear of COVID-19 and the impact it could have in terms of economic losses. However, as time went by, it increasingly appeared that the outbreak was much less devastating than initially anticipated <sup>2</sup>, and the mass movements of people mentioned above were gradually reversed. Apart from the early adoption of restrictive measures, the most widely proposed hypothesis for the much lower spread of COVID-19 in SSA than in most other world regions is that different demographic characteristics (younger average ages, lower



1  
2  
3 population densities, and lower urbanization rates)<sup>3-6</sup>, and a higher immune response in relation  
4  
5 with more highly solicited immune systems<sup>7</sup> hamper the spread. Recently, another strong  
6  
7 hypothesis has been put forward, suggesting that the extensive implementation of local  
8  
9 preventive strategies may have played a crucial role in substantially lowering the spread of the  
10  
11 disease<sup>8,9</sup>.

12  
13  
14  
15 Nevertheless, the possibility cannot be ruled out that the COVID-19 pandemic could spread  
16  
17 throughout SSA countries<sup>2,10</sup>, as it did (and still continues to do) in North African and European  
18  
19 countries (i.e., all the countries north of SSA (see the Johns Hopkins Coronavirus world map:  
20  
21 <https://www.arcgis.com/apps/opsdashboard/index.html#/bda7594740fd40299423467b48e9ecf>  
22  
23 6)). Such a development is of great concern because of the associated risk of overwhelming  
24  
25 already fragile healthcare systems<sup>1,11</sup> in a context where the pandemic has brought about a  
26  
27 worldwide economic crisis whose consequences might be severe for SSA<sup>12</sup>.

### 31 32 **Few COVID-19 data are available from an individual perspective**

33  
34 Most published analyses to date on the COVID-19 pandemic in SSA countries have not been  
35  
36 supported by collected data, except for data on the numbers of confirmed cases and deaths. One  
37  
38 study conducted in seven English-speaking countries (Ghana, Kenya, South Africa, Tanzania,  
39  
40 Uganda and the English-speaking regions of Cameroon) assessed the extent to which these  
41  
42 populations were exposed to COVID-19-related misinformation. Using an online survey (April-  
43  
44 May 2020), it showed that false beliefs were shared by between 15 and 30% of the respondents,  
45  
46 depending on the false statement assessed, with a higher likelihood of false beliefs in older and  
47  
48 unemployed respondents<sup>13</sup>. In addition, three studies assessed COVID-19-related knowledge,  
49  
50 attitudes and practices in Nigeria, in Ghana/South Africa, and in the Republic of Chad (April-  
51  
52 May 2020, March-April 2020, and May-August 2020, respectively) using online surveys. All  
53  
54 three showed that study participants were very familiar with personal preventive measures  
55  
56 against COVID-19 and the disease's main symptoms<sup>14-16</sup>. However, the Nigerian study also  
57  
58  
59  
60

1  
2  
3 showed that approximately half of the surveyed individuals believed that only elderly people  
4 with comorbidities were likely to develop severe COVID-19, and 85% were unaware of the risk  
5 of being infected by asymptomatic individuals. Consistent with this finding and given that the  
6 participants in the Nigerian study were relatively young (69% aged between 21 and 30 years  
7 old), only 22.5% of surveyed individuals reported wearing a face mask when they went out <sup>14</sup>.  
8  
9 More generally, the study conducted in the Republic of Chad showed significantly lower uptake  
10 of preventive practices in individuals with lower educational levels and precarious employment  
11  
12 <sup>16</sup>. Furthermore, other published studies emphasized individuals' fear of serious COVID-19-  
13 related economic repercussions (notably people living in urban Ghanaian neighbourhoods with  
14 their own business in the informal economy <sup>17</sup> and farmers working in the Ethiopian vegetable  
15 sector <sup>18</sup>).

### 28 29 **Study Objectives**

30  
31 The present ongoing study was designed in a setting marked by both uncertainty about the  
32 spread of COVID-19 in Sub-Saharan Africa and the scarce availability of individual data. Given  
33 the continued risk that the spread of COVID-19 will increase substantially in SSA, the memory  
34 of mass movements of people from big cities in March 2020 highlights the role that rural areas  
35 could play if such an event were to reoccur. This role could be major in a context where public  
36 authorities may not be in a position to systematically and substantially ease the economic shock  
37 induced by the pandemic<sup>19-21</sup>. While this role could evolve depending on rural populations'  
38 attitudes to such mass movements and their perceptions of the associated risks, we hypothesized  
39 that evaluating the evolution of individuals' perceived impact of COVID-19 pandemic could  
40 provide invaluable information about the potential pressure of the COVID-19 pandemic on  
41 these rural areas.  
42  
43  
44  
45  
46  
47  
48  
49  
50  
51  
52  
53  
54  
55

56  
57 Accordingly, the present ongoing longitudinal study was designed to investigate the attitudes,  
58 risk perceptions and preventive behaviours of people living in a Senegalese rural area in terms  
59  
60

1  
2  
3 of COVID-19, as well as their perceptions of the related economic impact. As rural areas often  
4 have limited access to the internet and given the increased risk of COVID-19 transmission  
5 during close contact interactions, the only available option was to conduct a phone-based  
6 survey.  
7  
8  
9  
10  
11  
12

## 13 **Methods and analysis**

### 14 **Population**

15  
16 This study includes adults (18 years old and over) living in all 30 villages of the rural Niakhar  
17 area covered by the Niakhar Health and Demographic Surveillance System (HDSS) <sup>22</sup>. The  
18 Niakhar HDSS, which is the oldest HDSS in Senegal (created in 1962) and one of the oldest in  
19 Western Africa, gathers regular data for the population covered, including demographic and  
20 health data. The Niakhar area itself is located 135 km East of Dakar and covers 203 km<sup>2</sup> with  
21 a population of 50 355 inhabitants (January 2018 census). More specifically, it is located in the  
22 ‘department’ (an administrative area) of Fatick (there are 45 departments in Senegal) which  
23 covers three different healthcare districts (including the Niakhar healthcare district). Most of  
24 the population (96.4%) living in this area belongs to the Serere ethnic group. The main  
25 economic activity is agriculture with food cultivation (millet) and a cash crop (peanuts), in  
26 addition to small-scale cattle breeding.  
27  
28  
29  
30  
31  
32  
33  
34  
35  
36  
37  
38  
39  
40  
41  
42  
43

### 44 **Representativeness of Niakhar area with respect to COVID-19**

45  
46 As the Niakhar area has been a site for research for several years, especially for infectology and  
47 epidemiology of infectious diseases, including malaria, meningitis and hepatitis <sup>22</sup>, the question  
48 arises as to how much the people living in the area are still truly representative of other  
49 Senegalese rural populations, especially regarding their knowledge of diseases that have long  
50 been studied there. However, given that COVID-19 is a new disease, we hypothesized that the  
51 Niakhar healthcare district would likely be comparable with other such districts in the country  
52 with a similar population density, age distribution and poverty index <sup>23</sup>.  
53  
54  
55  
56  
57  
58  
59  
60

1  
2  
3 To assess this hypothesis, we performed a multivariable Poisson regression on the numbers of  
4 confirmed COVID-19 cases at the district level (Senegalese Minister of Health:  
5 <http://www.sante.gouv.sn/Pr%2525C3%2525A9sentation/coronavirus-informations->  
6 [http://www.sante.gouv.sn/Pr%2525C3%2525A9sentation/coronavirus-informations-](http://www.sante.gouv.sn/Pr%2525C3%2525A9sentation/coronavirus-informations-officielles-et-quotidiennes-du-msas)  
7 [officielles-et-quotidiennes-du-msas](http://www.sante.gouv.sn/Pr%2525C3%2525A9sentation/coronavirus-informations-officielles-et-quotidiennes-du-msas)). While standardized residuals represent variations in the  
8 data that cannot be explained by the model, residual plots enabled us to identify outliers (Figure  
9 2). As a result, the Niakhar healthcare district could not be considered an outlier in terms of the  
10 number of declared cases of COVID-19 (standardized residuals= -0.53). Furthermore, at the  
11 time the study began, the prevalence of COVID-19 in the department of Fatick was comparable  
12 with that in other Senegalese departments with similar population densities (Figure 1).

### 23 **Study design and procedure**

24  
25 Study participants were randomly selected using a two-stage stratified sampling design. All 30  
26 villages in the Niakhar area were previously identified as rural (n=27) or semi-urban villages  
27 (n=3), depending on their infrastructure and equipment <sup>22</sup>. More specifically, unlike rural  
28 villages, the three semi-urbanised villages have health facilities, a weekly market, daily buses  
29 to the Senegal's capital Dakar, and several shops. The participating villages selected in the first  
30 stage (n=12) of the present study comprised the three semi-urban villages and a simple random  
31 sample of nine rural villages. In the second stage of sampling, 600 households from all the 1756  
32 households in these 12 participating villages were selected, again using simple random  
33 sampling.

34  
35 This figure of 600 households was not arrived at from a calculation to determine the optimal  
36 number of households to be included, but was the result of a trade-off between the budgetary  
37 and logistic constraints of surveying up to three members in each household (i.e., a potential  
38 maximum of 1800 individuals) in three successive waves of data collection (the first wave  
39 started on July 27, 2020). Taking into account the design of previous surveys conducted in the  
40 same area <sup>24</sup>, we assumed a response rate of 90% for the first wave of data collection and an  
41  
42  
43  
44  
45  
46  
47  
48  
49  
50  
51  
52  
53  
54  
55  
56  
57  
58  
59  
60

1  
2  
3 attrition rate of 15% over the data collection period, resulting in an estimated 500 surveyed  
4 households by the end of the third wave (scheduled for mid-2021). In the planned analyses,  
5 potential selection bias will be assessed and reduced by using sampling weights computed as  
6 reciprocals of the probabilities of selection of each household. Final weights will be calculated  
7 using an iterative process (ranking ratio estimation) involving sociodemographic data collected  
8 regularly by the Niakhar HDSS.  
9

### 16 17 **Longitudinal phone survey in multi-adult households**

18  
19 Data collection is expected to last at least until end-2021, unless the spread of COVID-19 at  
20 that time justifies extending data collection. The study started in March 2020 and it is funded  
21 until March 2022 (Inserm-ANRS, grant number ECTZ147735). Given that any application for  
22 funding for possible subsequent waves of data collection needs to occur well in advance, the  
23 decision about this issue has been postponed until mid-2021. For each wave, data are collected  
24 by surveying participants over their mobile phone. Participants' telephone numbers were  
25 recorded by community health workers (locally called *Badjanou Gokh*) prior to the first survey.  
26 Phone interviews are conducted using Computer assisted telephone interviews (CATI)  
27 software. To achieve higher response rates, 15 calls (1 initial and 14 callbacks) are planned  
28 during the several weeks of data collection, at different times of the day and on different days,  
29 before discarding a non-responsive telephone number. While 12 to 15 calls and 6 to 10 calls are  
30 generally recommended for landline and mobile CATI surveys respectively <sup>25</sup>, we opted for a  
31 maximum of 15 calls given the frequency of poor telephone connections in the area.  
32  
33  
34  
35  
36  
37  
38  
39  
40  
41  
42  
43  
44  
45  
46  
47  
48

49  
50 The COVID-19 sanitary context makes the implementation of the survey at each wave and the  
51 collection of data more complex than usual. Although this study protocol was the result of a  
52 close collaboration between Senegalese and French researchers, travelling restrictions  
53 prevented some of the latter from being physically present for the training of the CATI  
54 interviewers, for data collection preparatory meetings, for field meetings and for feedback  
55  
56  
57  
58  
59  
60

1  
2  
3 sessions. Accordingly, the Senegalese research team is in charge of coordinating data collection  
4 and organizing CATI schedules, although regular internet-based meetings with the French  
5 research team ensure joint decision-making.  
6  
7  
8  
9

10 The lack of the possibility to train interviewers up on CATI in Senegal because of the  
11 international travel restrictions meant that only experienced bilingual (French and Serere)  
12 interviewers already present in Senegal could administer the CATI surveys. As Serere is an oral  
13 only language, practice sessions to administer the questionnaires were performed by the  
14 interviewers in order to reach a consensus on the specific words to be used when performing  
15 the interviews in Serere. Consequently, the relevance and ease of understanding of each  
16 questionnaire item was assessed before the interviews took place in Serere. A total of seven  
17 interviewers collected data in the first wave. They were supervised by another senior  
18 interviewer whose specific role, in addition to supervision, was to share feedback on data  
19 collection with the two (Senegalese and French) research teams. In many aspects, the data  
20 collection process greatly benefits from long-term existing experience the interviewers have in  
21 administering research-based surveys.  
22  
23  
24  
25  
26  
27  
28  
29  
30  
31  
32  
33  
34  
35  
36  
37  
38

### 39 **Data collection**

40  
41 The first data collection wave began on July 27, 2020 and interviewing lasted six weeks.  
42 Furthermore, parallel data collection about local preventive strategies implemented in villages  
43 since July 2020 is about to be completed. Figure 3 summarizes the major steps of data collection  
44 and presents the study sample to be followed in our longitudinal design.  
45  
46  
47  
48  
49  
50

51 For the first wave, phone interviews took place with three different persons in each participating  
52 household as follows: the head of the household, his wife (for those who had more than one  
53 wife, the wife responsible for managing the household), and a relative from a city who had  
54 decided to come and live momentarily in the rural household because of the risk of COVID-19  
55 and the fear of associated economic consequences. Specifically, heads of households had to  
56  
57  
58  
59  
60

1  
2  
3 decide which wife and which temporary visiting relative would be surveyed, and to provide  
4 their names and mobile phone numbers during the first phone interview. When interviewing  
5 heads of households, their designated wives and visiting relatives on their mobile phones, the  
6 interviewers first presented the study and informed them about its longitudinal design, obtained  
7 their consent to participate, and then interviewed them. As a way of thanking households for  
8 their participation, the community health workers provided them with a personal protection kit  
9 including hydroalcoholic gel and a face mask at the end of the first wave of data collection.

10  
11  
12  
13  
14  
15  
16  
17  
18  
19  
20 As regards relatives temporarily living in the household, those individuals interviewed in the  
21 first wave of data collection will be surveyed in successive waves. New visiting relatives  
22 identified between two different waves of data collection will also be included in the study  
23 design by interviewing them in all data collection waves subsequent to their inclusion. As we  
24 wanted to ensure that our study design and protocol were feasible given current national and  
25 international restrictive measures due to COVID-19, we chose to wait until the first wave of  
26 data collection neared completion before presenting the study design here.

### 27 28 29 30 31 32 33 34 35 36 37 **Questionnaires**

38 Three questionnaires were constructed (one each) for the heads of the selected households, their  
39 designated wives in charge of managing the household, and their designated relative  
40 temporarily living with them (Supplementary file 1, 2 and 3, respectively). In addition to  
41 sharing identical sets of questions on several topics (risks perceptions, attitudes to curfew,  
42 attitudes to vaccines, beliefs about COVID-19 infection), the three separate survey  
43 questionnaires also contain other questions on other topics (economic impact, local preventive  
44 strategies). These questions differ between questionnaires. For example, with regard to local  
45 preventive strategies, household heads are asked about the local COVID-19 prevention  
46 strategies implemented in their village, while their wives are asked about anti-COVID-19  
47 private prevention measures in the household, and newcomers about personal preventive  
48  
49  
50  
51  
52  
53  
54  
55  
56  
57  
58  
59  
60

1  
2  
3 measures in the household and possibly asked to implement when they first arrived (e.g.,  
4 quarantine). While this study involves collecting data at different moments in time, the same  
5 topics and associated sets of questions presented below will be used throughout the study in  
6 order to evaluate evolutions.  
7  
8  
9  
10  
11  
12

## 13 **Measures**

### 14 *Sociodemographic characteristics*

15  
16 As the study's framework provides for collected data to be matched with existing data in the  
17 Niakhar HDSS <sup>22</sup> database, only individual sociodemographic data needs to be collected during  
18 the telephone interviews, including marital status, educational level, number of children, the  
19 latter's ages and type of schooling (public or religious school), as well as the respondent's level  
20 of access to the internet. With regard to employment at the time of the survey, participants are  
21 invited to answer open-ended questions whose responses are consequently recoded into nine  
22 different standard categories (Farmers, Craftsmen, Workers, Employees, Intermediate  
23 professions, Managers and higher intellectual professions, Students, Pensioners, Not engaged  
24 in active employment). While these categories are consistent with those adopted in some  
25 Northern countries, they will be grouped into broader categories if necessary (such as  
26 Employed, Seeking employment, and Other, inactive (Students, Pensioners)), and then  
27 considered in relation to educational level <sup>26</sup>.  
28  
29  
30  
31  
32  
33  
34  
35  
36  
37  
38  
39  
40  
41  
42  
43  
44  
45

### 46 *Risk perceptions*

47  
48 Collecting data on the perceived risks of COVID-19 is of crucial importance in understanding  
49 individuals' related attitudes and behaviours. In line with previous survey studies, the  
50 assessment of risk perceptions in the present study involves collecting information on  
51 introspective judgements <sup>27 28</sup>. After asking surveyed individuals whether they have heard about  
52 COVID-19 pandemic before being surveyed, an assessment is performed using a scale from 0  
53 (not at all) to 10 (extremely) to measure how worried they are about getting the disease, and  
54  
55  
56  
57  
58  
59  
60



1  
2  
3 how contagious and severe they perceive it to be <sup>29</sup>. In addition, perceived mortality of COVID-  
4  
5 19 is assessed based on a question about what the participant believes will be the number of  
6  
7 deaths out of every 100 people with COVID-19. To provide greater insight into participants'  
8  
9 COVID-19 risk perceptions, all the questions mentioned above are asked again for malaria, a  
10  
11 well-known and common viral infection in Sub-Saharan African countries which also starts  
12  
13 with flu-like symptoms.  
14  
15

16  
17 Finally, respondents are invited to self-assess their perceived absolute and relative risks of  
18  
19 COVID-19 infection <sup>30</sup> by ranking their level of self-perceived risk (four-point Likert-type scale  
20  
21 from “very low” (=1) to “very high” (=4)) and by positioning their own perceived risks with  
22  
23 respect to others of the same age and gender (five-point Likert-type scale from “much lower”  
24  
25 (=1) to “much higher” (=5)). The questionnaires also include items measuring the extent of the  
26  
27 respondent’s fear that the visiting relative is unknowingly infected with COVID-19 and  
28  
29 asymptomatic.  
30  
31  
32

33  
34 Other questionnaire items assessing risk perceptions include asking heads of households (/their  
35  
36 surveyed wife) to adopt their spouse’s perspective and to report the extent to which they believe  
37  
38 their spouse is worried about COVID-19. Similarly, both individuals are asked to report the  
39  
40 extent to which they believe their spouse perceives that she (/he) is at risk of COVID-19 and  
41  
42 how she (/he) places this level of perceived risk in relation to that of other wives (/husbands) of  
43  
44 the same age and gender. Accounting for the potential impact of respondents’ current health  
45  
46 state on their perceived risks, respondents are asked how they feel in terms of their state of  
47  
48 health at the time of the survey (eleven-point Likert-type scale from “very poor” (=0) to “very  
49  
50 well” (=10)).  
51  
52  
53

### 54 55 *Attitudes* 56 57 58 59 60

1  
2  
3 Given the unprecedented context of COVID-19 pandemic, assessing individual attitudes to the  
4 disease necessitates using ad-hoc questions. Considering the restrictive measures adopted in  
5 Senegal from March 2020 onward, attitudes to curfews in general, whether implemented in  
6 rural or urban areas are assessed in the present study. With regard to health issues, surveyed  
7 individuals are invited to report how worried they are about buying counterfeit drugs, their  
8 attitudes to vaccination in general and to (unavailable at the time of the first wave of data  
9 collection) the anti-COVID-19 vaccine. In addition, participants are asked whether they would  
10 consider having anti-COVID-19 vaccine for themselves and for their children if it were free of  
11 charge (four-point Likert-type scale from “certainly yes” (=1) to “definitely not” (=4) in all  
12 cases). Finally, individuals’ agreement (agree/disagree) is assessed regarding statements  
13 circulating on the internet and reflecting rumour-related fake information on COVID-19  
14 transmission and cure.

### 31 *Preventive behaviours*

32  
33 It has been recently suggested that locally implemented COVID-19 preventive strategies could  
34 potentially explain, at least in part, the as yet slow spread of COVID-19 in SSA<sup>89</sup>. The present  
35 study collected data which could shed some more light on this issue. In our ongoing longitudinal  
36 study, preventive behaviours cover individual protection measures by the study’s participants  
37 and collective prevention strategies implemented by administrative, religious or medical  
38 authorities in the area covered by the survey. With regard to the former, the study’s  
39 questionnaires include items measuring how much the COVID-19 pandemic has led to changes  
40 in everyday life in the participating households, in changes in journeys to and from the local  
41 market or the closest city, and in changes in the way relatives from cities are welcomed,  
42 especially in terms of possible quarantine upon their arrival.

43  
44  
45  
46  
47  
48  
49  
50  
51  
52  
53  
54  
55  
56  
57  
58  
59  
60  
61  
62  
63  
64  
65  
66  
67  
68  
69  
70  
71  
72  
73  
74  
75  
76  
77  
78  
79  
80  
81  
82  
83  
84  
85  
86  
87  
88  
89  
90  
91  
92  
93  
94  
95  
96  
97  
98  
99  
100  
101  
102  
103  
104  
105  
106  
107  
108  
109  
110  
111  
112  
113  
114  
115  
116  
117  
118  
119  
120  
121  
122  
123  
124  
125  
126  
127  
128  
129  
130  
131  
132  
133  
134  
135  
136  
137  
138  
139  
140  
141  
142  
143  
144  
145  
146  
147  
148  
149  
150  
151  
152  
153  
154  
155  
156  
157  
158  
159  
160  
161  
162  
163  
164  
165  
166  
167  
168  
169  
170  
171  
172  
173  
174  
175  
176  
177  
178  
179  
180  
181  
182  
183  
184  
185  
186  
187  
188  
189  
190  
191  
192  
193  
194  
195  
196  
197  
198  
199  
200  
201  
202  
203  
204  
205  
206  
207  
208  
209  
210  
211  
212  
213  
214  
215  
216  
217  
218  
219  
220  
221  
222  
223  
224  
225  
226  
227  
228  
229  
230  
231  
232  
233  
234  
235  
236  
237  
238  
239  
240  
241  
242  
243  
244  
245  
246  
247  
248  
249  
250  
251  
252  
253  
254  
255  
256  
257  
258  
259  
260  
261  
262  
263  
264  
265  
266  
267  
268  
269  
270  
271  
272  
273  
274  
275  
276  
277  
278  
279  
280  
281  
282  
283  
284  
285  
286  
287  
288  
289  
290  
291  
292  
293  
294  
295  
296  
297  
298  
299  
300  
301  
302  
303  
304  
305  
306  
307  
308  
309  
310  
311  
312  
313  
314  
315  
316  
317  
318  
319  
320  
321  
322  
323  
324  
325  
326  
327  
328  
329  
330  
331  
332  
333  
334  
335  
336  
337  
338  
339  
340  
341  
342  
343  
344  
345  
346  
347  
348  
349  
350  
351  
352  
353  
354  
355  
356  
357  
358  
359  
360  
361  
362  
363  
364  
365  
366  
367  
368  
369  
370  
371  
372  
373  
374  
375  
376  
377  
378  
379  
380  
381  
382  
383  
384  
385  
386  
387  
388  
389  
390  
391  
392  
393  
394  
395  
396  
397  
398  
399  
400  
401  
402  
403  
404  
405  
406  
407  
408  
409  
410  
411  
412  
413  
414  
415  
416  
417  
418  
419  
420  
421  
422  
423  
424  
425  
426  
427  
428  
429  
430  
431  
432  
433  
434  
435  
436  
437  
438  
439  
440  
441  
442  
443  
444  
445  
446  
447  
448  
449  
450  
451  
452  
453  
454  
455  
456  
457  
458  
459  
460  
461  
462  
463  
464  
465  
466  
467  
468  
469  
470  
471  
472  
473  
474  
475  
476  
477  
478  
479  
480  
481  
482  
483  
484  
485  
486  
487  
488  
489  
490  
491  
492  
493  
494  
495  
496  
497  
498  
499  
500  
501  
502  
503  
504  
505  
506  
507  
508  
509  
510  
511  
512  
513  
514  
515  
516  
517  
518  
519  
520  
521  
522  
523  
524  
525  
526  
527  
528  
529  
530  
531  
532  
533  
534  
535  
536  
537  
538  
539  
540  
541  
542  
543  
544  
545  
546  
547  
548  
549  
550  
551  
552  
553  
554  
555  
556  
557  
558  
559  
560  
561  
562  
563  
564  
565  
566  
567  
568  
569  
570  
571  
572  
573  
574  
575  
576  
577  
578  
579  
580  
581  
582  
583  
584  
585  
586  
587  
588  
589  
590  
591  
592  
593  
594  
595  
596  
597  
598  
599  
600  
601  
602  
603  
604  
605  
606  
607  
608  
609  
610  
611  
612  
613  
614  
615  
616  
617  
618  
619  
620  
621  
622  
623  
624  
625  
626  
627  
628  
629  
630  
631  
632  
633  
634  
635  
636  
637  
638  
639  
640  
641  
642  
643  
644  
645  
646  
647  
648  
649  
650  
651  
652  
653  
654  
655  
656  
657  
658  
659  
660  
661  
662  
663  
664  
665  
666  
667  
668  
669  
670  
671  
672  
673  
674  
675  
676  
677  
678  
679  
680  
681  
682  
683  
684  
685  
686  
687  
688  
689  
690  
691  
692  
693  
694  
695  
696  
697  
698  
699  
700  
701  
702  
703  
704  
705  
706  
707  
708  
709  
710  
711  
712  
713  
714  
715  
716  
717  
718  
719  
720  
721  
722  
723  
724  
725  
726  
727  
728  
729  
730  
731  
732  
733  
734  
735  
736  
737  
738  
739  
740  
741  
742  
743  
744  
745  
746  
747  
748  
749  
750  
751  
752  
753  
754  
755  
756  
757  
758  
759  
760  
761  
762  
763  
764  
765  
766  
767  
768  
769  
770  
771  
772  
773  
774  
775  
776  
777  
778  
779  
780  
781  
782  
783  
784  
785  
786  
787  
788  
789  
790  
791  
792  
793  
794  
795  
796  
797  
798  
799  
800  
801  
802  
803  
804  
805  
806  
807  
808  
809  
810  
811  
812  
813  
814  
815  
816  
817  
818  
819  
820  
821  
822  
823  
824  
825  
826  
827  
828  
829  
830  
831  
832  
833  
834  
835  
836  
837  
838  
839  
840  
841  
842  
843  
844  
845  
846  
847  
848  
849  
850  
851  
852  
853  
854  
855  
856  
857  
858  
859  
860  
861  
862  
863  
864  
865  
866  
867  
868  
869  
870  
871  
872  
873  
874  
875  
876  
877  
878  
879  
880  
881  
882  
883  
884  
885  
886  
887  
888  
889  
890  
891  
892  
893  
894  
895  
896  
897  
898  
899  
900  
901  
902  
903  
904  
905  
906  
907  
908  
909  
910  
911  
912  
913  
914  
915  
916  
917  
918  
919  
920  
921  
922  
923  
924  
925  
926  
927  
928  
929  
930  
931  
932  
933  
934  
935  
936  
937  
938  
939  
940  
941  
942  
943  
944  
945  
946  
947  
948  
949  
950  
951  
952  
953  
954  
955  
956  
957  
958  
959  
960  
961  
962  
963  
964  
965  
966  
967  
968  
969  
970  
971  
972  
973  
974  
975  
976  
977  
978  
979  
980  
981  
982  
983  
984  
985  
986  
987  
988  
989  
990  
991  
992  
993  
994  
995  
996  
997  
998  
999  
1000

1  
2  
3 the dates, duration and nature of all collective actions implemented in the study's 12 study  
4 villages. To do this, the interviewers who conduct the phone surveys have also been in charge  
5 of conducting face-to-face interviews in each village, with the village chief, the healthpost  
6 nurses, the community health workers (*Badjanou Gokh*), and representatives from both the  
7 town hall and the subprefecture, local associations involved in the fight against Covid-19 spread  
8 (e.g., former military personnel, student and youth associations), and non-governmental  
9 organizations (e.g., local branches of the Red Cross). At the regional level, interviews have also  
10 been conducted on a regular basis with representatives of the healthcare districts. The  
11 preventive measures identified mainly consist in the distribution of leaflets, antiseptic soap and  
12 face masks, as well as the installation of hand washing facilities in schools, markets, village  
13 entrances, households, churches and mosques. These data will continue to be collected over the  
14 whole data collection period.

### 31 ***Economic impact on everyday life***

32  
33 One primary concern about the spread of COVID-19 in Sub-Saharan African countries is a  
34 possible resulting economic shock<sup>12 19-21</sup>. Supposing that urban areas would most likely be the  
35 first to be highly impacted by the COVID-19 pandemic, rural areas could indeed be in position  
36 to soften, at least in part, the economic consequences of COVID-19 pandemic. In this respect,  
37 our ongoing study assesses the pandemic's impact with questions about the main  
38 sociodemographic characteristics of relatives from cities currently living in the household  
39 because of COVID-19, and questions about the perceived burden on the rural household (e.g.,  
40 having to provide food for more people) as well as the benefits (e.g., larger labour force for  
41 agricultural work) associated with their arrival in the household. In addition, the study examines  
42 possible assistance from administrative authorities or neighbours locally implemented, as well  
43 as possible assistance given to neighbours because of the COVID-19 pandemic. Furthermore,  
44 possible COVID-19 pandemic-related financial difficulties are explored concerning everyday  
45  
46  
47  
48  
49  
50  
51  
52  
53  
54  
55  
56  
57  
58  
59  
60

1  
2  
3 purchases and sales of crops in local markets. Finally, relatives from cities temporarily living  
4 in the household because of their fear of COVID-19 and induced economic losses are asked to  
5 self-assess the extent to which the pandemic has impacted their own life as well as everyday  
6 life in the household. In terms of financial support provided to the household, heads of  
7 households are asked about those relatives currently living with them and whether these  
8 relatives provided support before they arrived to temporarily stay. Similarly, they are asked  
9 about the extent to which relatives who left the household to go back to cities currently  
10 financially support the household.  
11  
12  
13  
14  
15  
16  
17  
18  
19  
20

### 21 22 ***Main relationships to be tested*** 23

24 In this unprecedented COVID-19 pandemic sanitary context, while the present study serves a  
25 descriptive purpose, its primary aim is to assess various relationships. In line with the economic-  
26 based approach recently published in the French context of COVID-19 <sup>31</sup>, our study should  
27 enable the calibration of individual risk perceptions to be assessed based on the consistency  
28 between perceived mortality of COVID-19 and epidemiological information available at the  
29 time of data collection. Furthermore, a greater understanding of calibration should be gained by  
30 the fact that we are taking perceived worry, severity and contagiousness of COVID-19 into  
31 account, and conducting comparisons with introspective judgements relating to malaria. In  
32 addition, taking participants' socio-demographic characteristics into account should provide  
33 greater insight into the determinants of risk perceptions. Following on from Attema et al.  
34 (2021), we will examine the calibration, heterogeneity and determinants of risk perceptions,  
35 accounting for the temporal dynamics of the COVID-19 pandemic in Senegal. Finally, by  
36 focusing on the extent to which interviewed persons (husbands, wives) assess their spouse's  
37 perceived risk of getting COVID-19, this study could also help to estimate the potential impact  
38 of discrepancies in couples' risk perceptions regarding the extent of preventive measures  
39 actually adopted in households.  
40  
41  
42  
43  
44  
45  
46  
47  
48  
49  
50  
51  
52  
53  
54  
55  
56  
57  
58  
59  
60

1  
2  
3 As regards the COVID-19 preventive strategies implemented at the village and household  
4 levels, it is possible that experience gained from the Ebola and HIV/AIDS pandemics has  
5 helped people manage the risk of COVID-19<sup>10</sup>. In the present study, we hypothesize that  
6 accurate recall of local prevention strategies currently in place is higher in villages with more  
7 prevention strategies implemented. We also hypothesize that implementing preventive  
8 strategies at the village level might have a positive impact on adopting strategies at the  
9 household level. Exploring the relationship between collective and individual preventive  
10 behaviours will therefore enable us to evaluate the impact of locally implemented preventive  
11 measures on slowing the spread of COVID-19. Using the prospectively collected data will also  
12 allow us to analyse the dynamics of this relationship over time with respect to attitudes and risk  
13 perceptions.

14  
15 With regard to the economic impact of COVID-19 pandemic on everyday lives, adopting a  
16 descriptive approach will be useful given the scarce data available. In addition, accounting for  
17 the sociodemographic characteristics of both heads of households and relatives who temporarily  
18 left big cities will allow us to assess the size of any possible gradient in the economic pressure  
19 of the COVID-19 pandemic on rural areas and its evolution over time. In the unprecedented  
20 context of the COVID-19 pandemic, the generalizability of the study's results will however  
21 remain to be explored.

### 22 ***Patient and public involvement***

23 No patient involved. We plan to disseminate results to the study participants and all the villagers  
24 interested in the study in participating villages at the end of the study (currently March 2022).  
25 If restrictive measures against the gathering of people are no longer in place, dissemination is  
26 planned to be held in the open air and in the presence of each village chief, healthpost  
27 representatives, and the *Badjanou Gokh*. In addition, restitution workshops are planned to be  
28 organised at the sanitary district and regional level and to involve administrative and sanitary  
29

1  
2  
3 authorities. Lastly, the main findings from the study are planned to be compiled in a document  
4 distributed at sub-national and national levels to the administrative and sanitary authorities.  
5  
6  
7

## 8 **Ethics and dissemination**

9  
10 COVID-19 is currently (as of February 2021) spreading relatively slowly in SSA although a  
11 sharp increase in its spread cannot be excluded. Given the current context, the present ongoing  
12 longitudinal study protocol aims to provide data on the attitudinal, behavioural and economic  
13 consequences of the disease in a rural area in Senegal at a time when very few data are available.  
14 Since rural areas may likely be seen as safe refuges, our study collects data from heads of rural  
15 households, their wives (in charge of managing the household) and relatives who leave cities  
16 to temporarily live in these households, specifically because of the COVID-19 pandemic. The  
17 study protocol was approved by the Senegalese National Ethical Committee for Research in  
18 Health (131/MSAS/CNERS/Sec) and received authorisation from the Senegalese Ministry of  
19 Health (619/MSAS/DPRS/DR) and the French Commission on Information Technology and  
20 Liberties (CNIL 2220771).  
21  
22  
23  
24  
25  
26  
27  
28  
29  
30  
31  
32  
33  
34  
35

36  
37 To conclude, this ongoing study benefits greatly from close previously established research  
38 relationships between the researchers and the interviewers involved. Now that data collection  
39 for the first wave is nearing completion, and that data collection has been proven to be feasible  
40 despite COVID-19 restrictions, we believe that the primary benefit of our longitudinal design  
41 will be to provide data which could help to analyse evolutions in risk perceptions, attitudes, and  
42 preventive behaviours of the disease, as well as its economic impact on everyday lives. In the  
43 unprecedented context of the COVID-19 pandemic, the generalizability of the study's results  
44 needs to be explored.  
45  
46  
47  
48  
49  
50  
51  
52  
53  
54

## 55 **Acknowledgements**

56  
57  
58  
59  
60

We would like to thank the interviewers involved in the study, i.e. Modou DIOME, Cheikh DIOUF, Ndèye Selbé DIOUF, Moussa GUEYE, Fadiène NDIAYE, Mayé NDOUR, Coumba Sandiane SENE, Natalie TINE. Finally, our thanks to Jude Sweeney (Milan, Italy) for the English revision and editing of our manuscript.

## Group Information

Members of the CO3ELSER Study Group are Elhadji Ba ; Assane Ndiaye ; Cheikh Sokhna (UMR VITROME, IRD-Université Aix Marseille, AP-HM, SSA, IHU-Méditerranée Infection, Marseille, France, and Campus International, IRD-UCAD de l'IRD, Dakar, Sénégal) Cyril Berenger, Gwenaëlle Maradan (ORS PACA, Southeastern Health Regional Observatory, 13006, Marseille, France), Valerie Seror, Sebastien Cortaredona, Patrick Peretti-Watel (Aix Marseille Univ, IRD, AP-HM, SSA, VITROME, Marseille, France, IHU-Méditerranée Infection, Marseille, France), Olivier L'Haridon (Faculty of Economics, University of Rennes 1, Univ Rennes, CNRS, CREM UMR 6211, Rennes, France), Jocelyn Raude (EHESP School of Public Health, Rennes, France).

## Figure 1. Number of COVID-19 confirmed cases at the department level (n=45)

Source: <http://www.sante.gouv.sn/Pr%2525C3%2525A9sentation/coronavirus-informations-officielles-et-quotidiennes-du-msas>; data accessed on November 26, 2020.

Note: The administrative 'department' of Fatick covers several healthcare districts, including the Niakhar healthcare district).

## Figure 2. Multivariable Poisson regression at the district level and residual dependence plot (n=79).

Note: Outcome: number of confirmed COVID-19 cases at the healthcare district level (data accessed on November 26, 2020: <http://www.sante.gouv.sn/Pr%2525C3%2525A9sentation/coronavirus-informations-officielles-et-quotidiennes-du-msas>). Offset: total population of the healthcare district. Covariates: Urbanization rates (%), Poverty index (%), and Rates of people aged 50 and older (%).

1  
2  
3  
4  
5  
6  
7  
8  
9  
10  
11  
12  
13  
14  
15  
16  
17  
18  
19  
20  
21  
22  
23  
24  
25  
26  
27  
28  
29  
30  
31  
32  
33  
34  
35  
36  
37  
38  
39  
40  
41  
42  
43  
44  
45  
46  
47  
48  
49  
50  
51  
52  
53  
54  
55  
56  
57  
58  
59  
60

For peer review only



### Figure 3. Study flow diagram

Note: Mobile phone numbers provided by community health workers (Badjanou Gokh). 500 surveyed households were expected to participate by the end of the third wave of data collection (scheduled for mid-2021), given a 90% response rate for the first wave and a 15% attrition rate at each subsequent wave.

### References

1. Martinez-Alvarez M, Jarde A, Usuf E, et al. COVID-19 pandemic in west Africa. *Lancet Glob Health* 2020;8(5):e631-e32. doi: 10.1016/S2214-109X(20)30123-6 [published Online First: 2020/04/05]
2. Sun H, Dickens BL, Cook AR, et al. Importations of COVID-19 into African countries and risk of onward spread. *BMC Infect Dis* 2020;20(1):598. doi: 10.1186/s12879-020-05323-w [published Online First: 2020/08/15]
3. Cabore JW, Karamagi HC, Kipruto H, et al. The potential effects of widespread community transmission of SARS-CoV-2 infection in the World Health Organization African Region: a predictive model. *BMJ Glob Health* 2020;5(5) doi: 10.1136/bmjgh-2020-002647 [published Online First: 2020/05/27]
4. Diop BZ, Ngom M, Pougue Biyong C, et al. The relatively young and rural population may limit the spread and severity of COVID-19 in Africa: a modelling study. *BMJ Glob Health* 2020;5(5) doi: 10.1136/bmjgh-2020-002699 [published Online First: 2020/05/27]
5. Ghisolfi S, Almas I, Sandefur JC, et al. Predicted COVID-19 fatality rates based on age, sex, comorbidities and health system capacity. *BMJ Glob Health* 2020;5(9) doi: 10.1136/bmjgh-2020-003094 [published Online First: 2020/09/12]
6. Nguimkeu P, Tadadjeu S. Why is the number of COVID-19 cases lower than expected in Sub-Saharan Africa? A cross-sectional analysis of the role of demographic and geographic factors. *World Dev* 2021;138:105251. doi: 10.1016/j.worlddev.2020.105251 [published Online First: 2020/10/28]
7. Netea MG, Dominguez-Andres J, Barreiro LB, et al. Defining trained immunity and its role in health and disease. *Nat Rev Immunol* 2020;20(6):375-88. doi: 10.1038/s41577-020-0285-6 [published Online First: 2020/03/07]
8. Colebunders R, Siewe Fodjo JN, Vanham G, et al. A call for strengthened evidence on targeted, non-pharmaceutical interventions against COVID-19 for the protection of

- 1  
2  
3 vulnerable individuals in sub-Saharan Africa. *Int J Infect Dis* 2020;99:482-84. doi:  
4 10.1016/j.ijid.2020.08.060 [published Online First: 2020/08/31]  
5  
6  
7 9. Evans MV, Garchitorena A, Rakotonanahary RJL, et al. Reconciling model predictions with  
8 low reported cases of COVID-19 in Sub-Saharan Africa: insights from Madagascar.  
9 *Glob Health Action* 2020;13(1):1816044. doi: 10.1080/16549716.2020.1816044  
10 [published Online First: 2020/10/06]  
11  
12  
13 10. Payne C. COVID-19 in Africa. *Nat Hum Behav* 2020;4(5):436-37. doi: 10.1038/s41562-  
14 020-0870-5 [published Online First: 2020/04/05]  
15  
16  
17 11. Paintsil E. COVID-19 threatens health systems in sub-Saharan Africa: the eye of the  
18 crocodile. *J Clin Invest* 2020;130(6):2741-44. doi: 10.1172/JCI138493 [published  
19 Online First: 2020/04/01]  
20  
21  
22 12. Ataguba JE. COVID-19 Pandemic, a War to be Won: Understanding its Economic  
23 Implications for Africa. *Appl Health Econ Health Policy* 2020;18(3):325-28. doi:  
24 10.1007/s40258-020-00580-x [published Online First: 2020/04/07]  
25  
26  
27 13. Osuagwu UL, Miner CA, Bhattarai D, et al. Misinformation About COVID-19 in Sub-  
28 Saharan Africa: Evidence from a Cross-Sectional Survey. *Health Secur* 2021;19(1):44-  
29 56. doi: 10.1089/HS.2020.0202 [published Online First: 2021/02/20]  
30  
31  
32 14. Adesegun OA, Binuyo T, Adeyemi O, et al. The COVID-19 Crisis in Sub-Saharan Africa:  
33 Knowledge, Attitudes, and Practices of the Nigerian Public. *Am J Trop Med Hyg*  
34 2020;103(5):1997-2004. doi: 10.4269/ajtmh.20-0461 [published Online First:  
35 2020/09/26]  
36  
37  
38 15. Reddy SP, Sewpaul R, Mabaso M, et al. South Africans' understanding of and response to  
39 the COVID-19 outbreak: An online survey. *S Afr Med J* 2020;110(9):894-902.  
40 [published Online First: 2020/09/04]  
41  
42  
43 16. Takoudjou Dzomo GR, Bernales M, Lopez R, et al. Knowledge, Attitudes and Practices  
44 Regarding COVID19 in N'Djamena, Chad. *J Community Health* 2021;46(2):259-66.  
45 doi: 10.1007/s10900-021-00963-8 [published Online First: 2021/01/24]  
46  
47  
48 17. Durizzo K, Asiedu E, Van der Merwe A, et al. Managing the COVID-19 pandemic in poor  
49 urban neighborhoods: The case of Accra and Johannesburg. *World Dev*  
50 2021;137:105175. doi: 10.1016/j.worlddev.2020.105175 [published Online First:  
51 2020/09/10]  
52  
53  
54 18. Minten B, Mohammed B, Tamru S. Emerging Medium-Scale Tenant Farming, Gig  
55 Economies, and the COVID-19 Disruption: The Case of Commercial Vegetable  
56  
57  
58  
59  
60

- 1  
2  
3 Clusters in Ethiopia. *Eur J Dev Res* 2020;1-28. doi: 10.1057/s41287-020-00315-7  
4 [published Online First: 2020/10/27]  
5  
6  
7 19. Amewu S, Asante S, Pauw K, et al. The Economic Costs of COVID-19 in Sub-Saharan  
8 Africa: Insights from a Simulation Exercise for Ghana. *Eur J Dev Res* 2020;1-26. doi:  
9 10.1057/s41287-020-00332-6 [published Online First: 2020/11/05]  
10  
11 20. Haider N, Osman AY, Gadzekpo A, et al. Lockdown measures in response to COVID-19  
12 in nine sub-Saharan African countries. *BMJ Glob Health* 2020;5(10) doi:  
13 10.1136/bmjgh-2020-003319 [published Online First: 2020/10/09]  
14  
15 21. Renzaho AMN. The Need for the Right Socio-Economic and Cultural Fit in the COVID-19  
16 Response in Sub-Saharan Africa: Examining Demographic, Economic Political, Health,  
17 and Socio-Cultural Differentials in COVID-19 Morbidity and Mortality. *Int J Environ*  
18 *Res Public Health* 2020;17(10) doi: 10.3390/ijerph17103445 [published Online First:  
19 2020/05/21]  
20  
21 22. Delaunay V, Douillot L, Diallo A, et al. Profile: the Niakhar Health and Demographic  
22 Surveillance System. *Int J Epidemiol* 2013;42(4):1002-11. doi: 10.1093/ije/dyt100  
23 [published Online First: 2013/09/26]  
24  
25 23. Khaliloulah I. Accessibilité géographique des structures sanitaires au Sénégal. *Annales des*  
26 *sciences de la santé* 2017;1(10):10-25.  
27  
28 24. Coste M, De Seze M, Diallo A, et al. Burden and impacts of chronic hepatitis B infection  
29 in rural Senegal: study protocol of a cross-sectional survey in the area of Niakhar  
30 (AmBASS ANRS 12356). *BMJ Open* 2019;9(7):e030211. doi: 10.1136/bmjopen-2019-  
31 030211 [published Online First: 2019/07/20]  
32  
33 25. Vicente P, Marques C, Reis E. Effects of call patterns on the likelihood of contact and of  
34 interview in mobile CATI surveys. Retrieved from <https://surveyinsightsorg/?p=9044>  
35 2017  
36  
37 26. Fiorentino M, Eubanks A, Coulaud PJ, et al. Homonegativity, sexual violence and condom  
38 use with women in men who have sex with men and women in West Africa. *AIDS*  
39 2021;35(4):681-87. doi: 10.1097/QAD.0000000000002782 [published Online First:  
40 2020/12/12]  
41  
42 27. Carman KG, Kooreman P. Probability perceptions and preventive health care. *J Risk*  
43 *Uncertain* 2014;49(1):43-71.  
44  
45 28. Viscusi WK. Do smokers underestimate risks? *J Polit Econ* 1990;98(6):1253-56.  
46  
47  
48  
49  
50  
51  
52  
53  
54  
55  
56  
57  
58  
59  
60

- 1  
2  
3 29. Ibuka Y, Chapman GB, Meyers LA, et al. The dynamics of risk perceptions and  
4 precautionary behavior in response to 2009 (H1N1) pandemic influenza. *BMC Infect*  
5 *Dis* 2010;10:296. doi: 10.1186/1471-2334-10-296 [published Online First: 2010/10/16]  
6  
7  
8 30. Malenka DJ, Baron JA, Johansen S, et al. The framing effect of relative and absolute risk.  
9 *J Gen Intern Med* 1993;8(10):543-8. doi: 10.1007/BF02599636 [published Online First:  
10 1993/10/01]  
11  
12  
13 31. Attema AE, L'Haridon O, Raude J, et al. Beliefs and Risk Perceptions About COVID-19:  
14 Evidence From Two Successive French Representative Surveys During Lockdown.  
15 *Front Psychol* 2021;12:619145. doi: 10.3389/fpsyg.2021.619145 [published Online  
16 First: 2021/02/19]  
17  
18  
19  
20  
21  
22  
23  
24  
25  
26  
27  
28  
29  
30  
31  
32  
33  
34  
35  
36  
37  
38  
39  
40  
41  
42  
43  
44  
45  
46  
47  
48  
49  
50  
51  
52  
53  
54  
55  
56  
57  
58  
59  
60

1  
2  
3 **Authors' contributions:** VS and CS conceptualised the study and obtained funding. GM, E-  
4 HB, OLH and SC contributed to the development of the study design. GM, E-HB, and CB were  
5 responsible for the development of the data collection platform, field testing of the study  
6 logistics, and participant recruitment. VS, CS, GM, OLH and SC drafted the first version of the  
7 manuscript. All authors read, edited and approved the final version.  
8  
9

10  
11  
12  
13  
14  
15 **Funding statement:** This work is supported by the French National Institute for Health and  
16 Medical Research-French National Agency for Aids and Viral Hepatitis Research (Inserm-  
17 ANRS, grant number ECTZ147735).  
18  
19

20  
21  
22  
23 **Competing interests statement.** No competing interests to declare.  
24  
25

26 **Word Count:** 4633 words.  
27  
28  
29  
30  
31  
32  
33  
34  
35  
36  
37  
38  
39  
40  
41  
42  
43  
44  
45  
46  
47  
48  
49  
50  
51  
52  
53  
54  
55  
56  
57  
58  
59  
60

1  
2  
3  
4  
5  
6  
7  
8  
9  
10  
11  
12  
13  
14  
15  
16  
17  
18  
19  
20  
21  
22  
23  
24  
25  
26  
27  
28  
29  
30  
31  
32  
33  
34  
35  
36  
37  
38  
39  
40  
41  
42  
43  
44  
45  
46  
47  
48  
49  
50  
51  
52  
53  
54  
55  
56  
57  
58  
59  
60

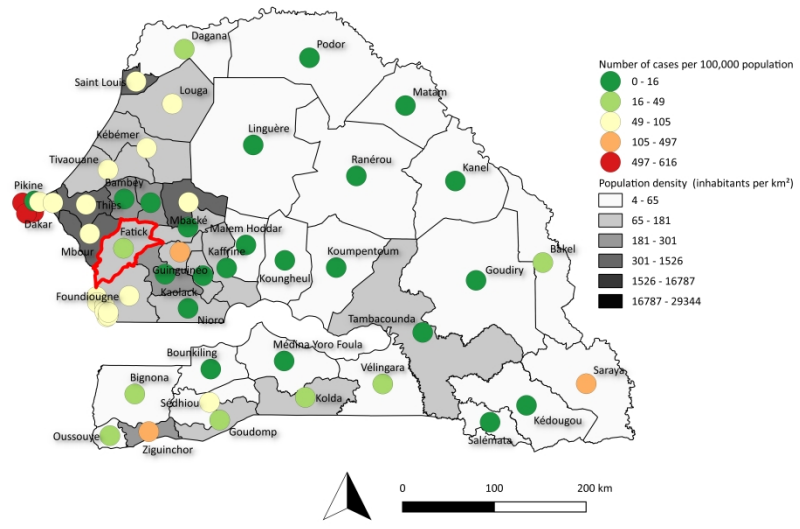

Figure 1. Number of COVID-19 confirmed cases at the department level (n=45)

593x419mm (300 x 300 DPI)

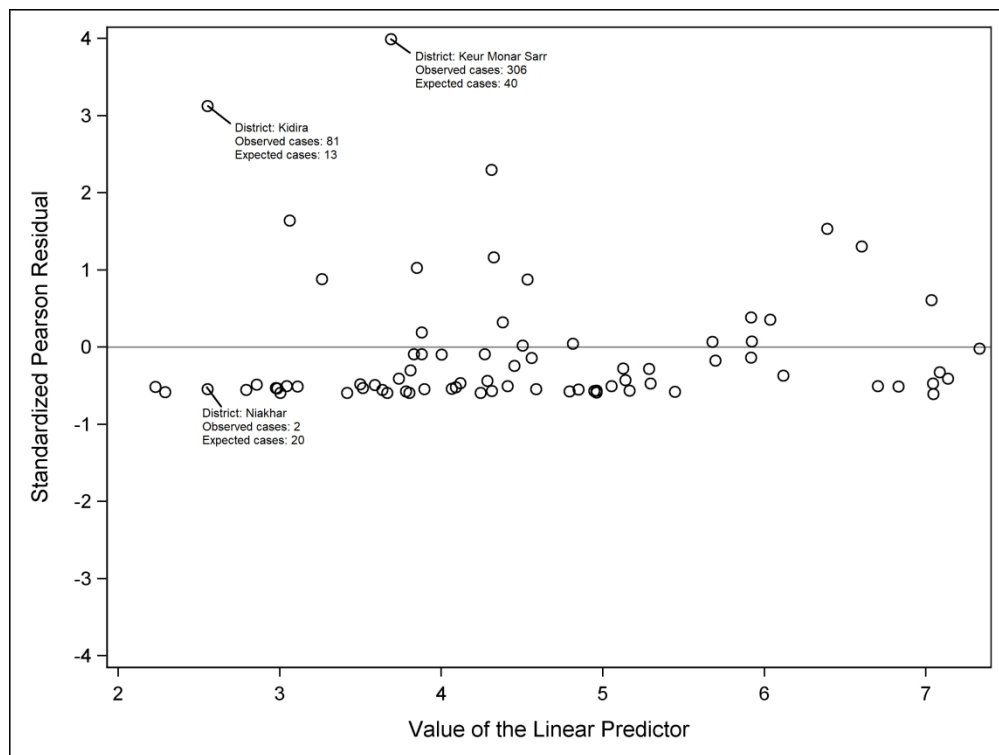

Figure 2. Multivariable Poisson regression at the district level and residual dependence plot (n=79).

225x169mm (300 x 300 DPI)

1  
2  
3  
4  
5  
6  
7  
8  
9  
10  
11  
12  
13  
14  
15  
16  
17  
18  
19  
20  
21  
22  
23  
24  
25  
26  
27  
28  
29  
30  
31  
32  
33  
34  
35  
36  
37  
38  
39  
40  
41  
42  
43  
44  
45  
46  
47  
48  
49  
50  
51  
52  
53  
54  
55  
56  
57  
58  
59  
60

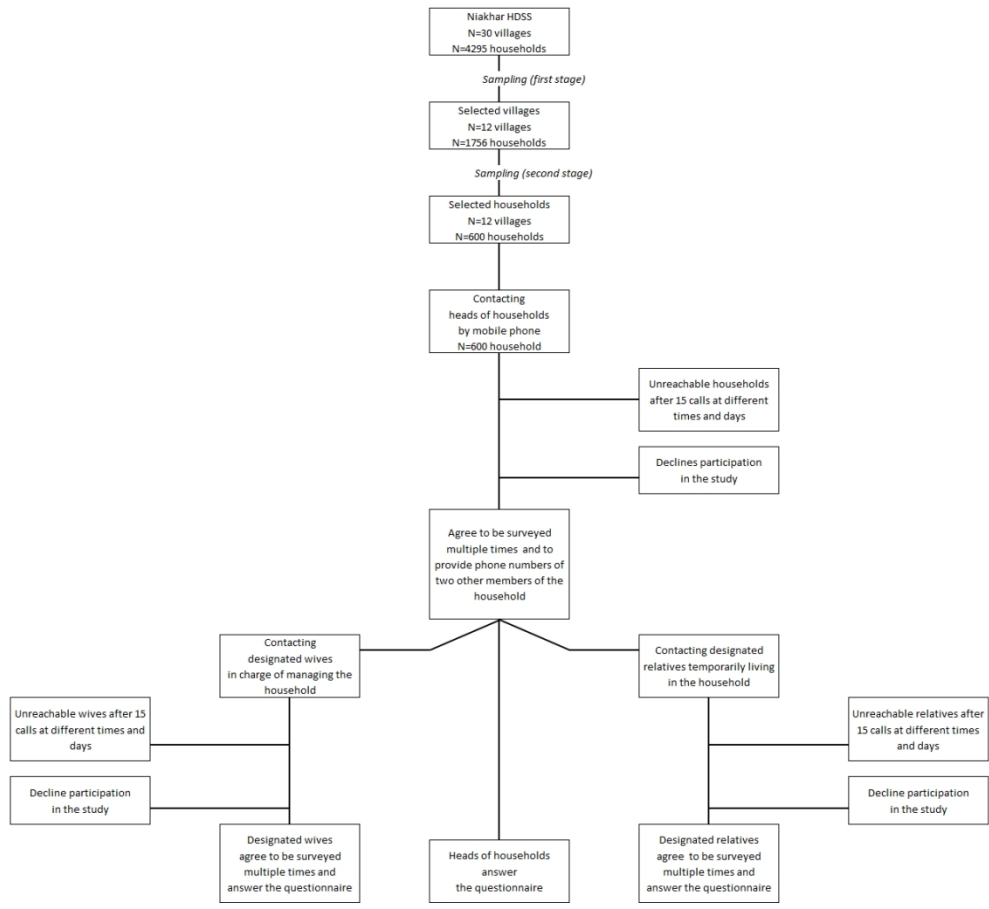

Figure 3. Study flow diagram  
107x98mm (300 x 300 DPI)



## Chef de famille : A PROPOS DU CORONAVIRUS...

### C1. Avez-vous déjà entendu parler du Coronavirus ?

1. Oui                       2. Non → **Aller à la question IC1**

### C2. Quand avez-vous appris qu'il y a une épidémie de Coronavirus ?

1. Quand l'épidémie était en Chine ou en Asie  
 2. Quand l'épidémie est arrivée en Europe  
 3. Quand l'épidémie est arrivée en Afrique  
 4. Quand l'épidémie est arrivée au Sénégal  
 5. Autre : \_\_\_\_\_

### C3. Comment avez-vous appris qu'il y a une épidémie de Coronavirus ?

1. Par la radio ou la télévision  
 2. Par Internet  
 3. Par des membres de la famille en ville  
 4. Par des voisins  
 5. Par le chef du village  
 6. Par le Centre de santé  
 7. Par votre représentant religieux (l'imam ou le curé)  
 8. Par les relais communautaires  
 9. Par les Badienou Gokh  
 10. Autre : \_\_\_\_\_

### C4. Avez-vous accès à Internet ?

1. Très facilement     2. Plutôt facilement     3. Plutôt difficilement     4. Très difficilement

### C5. Si C4=1 à 3 : Est-ce que vous allez sur Internet pour avoir des informations sur le Coronavirus ?

1. Oui, tous les jours  
 2. Oui, quelques fois par semaine  
 3. Oui, de temps en temps  
 4. Non, jamais

### C6. Etes-vous inquiet qu'un membre de votre cuisine attrape le coronavirus ?

1. Très inquiet     2. Plutôt inquiet     3. Plutôt pas inquiet     4. Pas inquiet du tout

### C7. Avez-vous changé vos habitudes pour éviter que le Coronavirus arrive dans votre cuisine ?

1. Oui                       2. Non

### C8. Est-ce que le Chef du village a pris des mesures pour éviter que les habitants attrapent le Coronavirus ?

1. Oui                       2. Non

↳ Lesquelles ? \_\_\_\_\_

### C9. Est-ce que le Centre de santé a pris des mesures pour éviter que les habitants attrapent le Coronavirus ?

1. Oui                       2. Non

↳ Lesquelles ? \_\_\_\_\_

**C10. Pour vous-même, pensez-vous que votre risque d'attraper le Coronavirus est ?**

1. Très faible
2. Plutôt faible
3. Plutôt élevé
4. Très élevé

**C11. Par rapport aux hommes de votre âge, est-ce que vous pensez que votre risque d'attraper le Coronavirus est ?**

1. Beaucoup moins importants que pour les autres hommes de mon âge
2. Moins importants que pour les autres hommes de mon âge
3. Ni plus ni moins importants que pour les autres hommes de mon âge
4. Plus importants que pour les autres hommes de mon âge
5. Beaucoup plus importants que pour les autres hommes de mon âge

**C13A. Si vous ou un membre de votre famille attrapait le Coronavirus, où iriez-vous pour les soins ?**

1. Poste de Santé     2. Guérisseur     3. Autre ; Préciser \_\_\_\_\_

**C13B. Pensez-vous à un médicament pour soigner le coronavirus ?**

1. Oui     2. Non

**C13C. Si oui, lequel ?** \_\_\_\_\_.

**C14. En général, craignez-vous d'acheter de faux médicaments ?**

1. Oui, tout à fait     2. Oui, plutôt     3. Non, plutôt pas     4. Non, pas du tout

**C15. En général, êtes-vous réticent à l'idée de vous faire vacciner ?**

1. Oui, tout à fait     2. Oui, plutôt     3. Non, plutôt pas     4. Non, pas du tout

**C16. Si un vaccin contre le Coronavirus était disponible et gratuit, est-ce que vous voudriez vous faire vacciner ?**

1. Oui, certainement     2. Oui, probablement     3. Non, probablement pas     4. Non, certainement pas

**Si C16=3 ou 4 : C16A. Pour quelles raisons ne vous feriez-vous pas vacciner ?**

1. Vous êtes contre la vaccination en général
2. Vous pensez qu'un vaccin élaboré dans l'urgence est trop dangereux
3. Vous pensez que c'est inutile parce que le COVID-19 est peu dangereux
4. Autre : \_\_\_\_\_

**C17. Connaissez-vous des personnes dans votre famille, ou parmi vos amis ou connaissances, qui sont, ou qui ont été malades du Coronavirus ?**

1. Oui, dans la famille     2. Oui, parmi les amis ou connaissances
3. Oui, à la fois dans la famille et parmi les amis ou connaissances     3. Non

**C18. Si C17=1,3 : Est-ce qu'il s'agit de personnes qui vivent actuellement avec vous ?**

1. Oui     2. Non

1  
2  
3  
4  
5  
6  
7  
8  
9  
10  
11  
12  
13  
14  
15  
16  
17  
18  
19  
20  
21  
22  
23  
24  
25  
26  
27  
28  
29  
30  
31  
32  
33  
34  
35  
36  
37  
38  
39  
40  
41  
42  
43  
44  
45  
46  
47  
48  
49  
50  
51  
52  
53  
54  
55  
56  
57  
58  
59  
60

**C19. Selon vous, est-ce que le couvre-feux dans le bassin de Niakhar est nécessaire pour limiter l'épidémie de Coronavirus ?**

1. Oui, tout à fait    2. Oui, plutôt    3. Non, plutôt pas    4. Non, pas du tout

**C20. Selon vous, est-ce que le couvre-feux dans les villes permet de limiter l'épidémie de Coronavirus ?**

1. Oui, tout à fait    2. Oui, plutôt    3. Non, plutôt pas    4. Non, pas du tout

**C21. Selon vous, qu'est-ce qui est préférable ?**

1. Imposer le couvre-feu seulement dans les zones où il y a des malades du Coronavirus  
 2. Imposer le couvre-feu dans tout le Sénégal pour que tous les citoyens vivent la même chose  
 3. Ne pas imposer de couvre-feu du tout parce qu'il y a très peu de malades au Sénégal

**C22. Selon vous, dans combien de temps est-ce que l'épidémie de Coronavirus sera terminée au Sénégal ? (en mois ou en semaines) ?** |\_\_|\_\_| mois **OU** |\_\_|\_\_| semaines

## QUELLE EST VOTRE PERCEPTION DES RISQUES DE CORONAVIRUS ?

### PR1. A quel point la possibilité d'attraper le Coronavirus vous inquiète-t-elle ?

Donnez une note entre 0 et 10 : la note 0 signifie que ça ne vous inquiète pas du tout, et la note 10 que ça vous inquiète énormément.

|   |   |   |   |   |   |   |   |   |   |    |
|---|---|---|---|---|---|---|---|---|---|----|
| 0 | 1 | 2 | 3 | 4 | 5 | 6 | 7 | 8 | 9 | 10 |
|---|---|---|---|---|---|---|---|---|---|----|

### PR2. Selon vous, quelle est la contagiosité du Coronavirus, c'est-à-dire la facilité avec laquelle ce virus peut se transmettre d'une personne à l'autre ?

Donnez une note entre 0 et 10 : la note 0 signifie que ça le Coronavirus est très peu contagieux et la note 10 qu'il est vraiment très contagieux.

|   |   |   |   |   |   |   |   |   |   |    |
|---|---|---|---|---|---|---|---|---|---|----|
| 0 | 1 | 2 | 3 | 4 | 5 | 6 | 7 | 8 | 9 | 10 |
|---|---|---|---|---|---|---|---|---|---|----|

### PR3. Selon vous, quelle est la gravité du Coronavirus ?

Donnez une note entre 0 et 10 : la note 0 signifie qu'attraper le Coronavirus n'est pas du tout grave et la note 10 que c'est vraiment très grave.

|   |   |   |   |   |   |   |   |   |   |    |
|---|---|---|---|---|---|---|---|---|---|----|
| 0 | 1 | 2 | 3 | 4 | 5 | 6 | 7 | 8 | 9 | 10 |
|---|---|---|---|---|---|---|---|---|---|----|

### PR4. Selon vous, sur 100 personnes qui attrapent le Coronavirus, combien d'entre elles pourraient mourir des suites de la maladie ?

Donnez un nombre entre 0 et 100 :      / \_ / \_ / \_ / personnes

## ET POUR LE PALUDISME ?

### PR1BIS. A quel point la possibilité d'attraper le paludisme vous inquiète-t-il ?

Donnez une note entre 0 et 10 : la note 0 signifie que ça ne vous inquiète pas du tout, et la note 10 que ça vous inquiète énormément.

|   |   |   |   |   |   |   |   |   |   |    |
|---|---|---|---|---|---|---|---|---|---|----|
| 0 | 1 | 2 | 3 | 4 | 5 | 6 | 7 | 8 | 9 | 10 |
|---|---|---|---|---|---|---|---|---|---|----|

### PR3BIS. Selon vous, quelle est la gravité du paludisme ?

Donnez une note entre 0 et 10 : la note 0 signifie qu'attraper le paludisme n'est pas du tout grave et la note 10 que c'est vraiment très grave.

|   |   |   |   |   |   |   |   |   |   |    |
|---|---|---|---|---|---|---|---|---|---|----|
| 0 | 1 | 2 | 3 | 4 | 5 | 6 | 7 | 8 | 9 | 10 |
|---|---|---|---|---|---|---|---|---|---|----|

### PR4BIS. Selon vous, sur 100 personnes qui attrapent le paludisme, combien d'entre elles pourraient mourir des suites de la maladie ?

Donnez un nombre entre 0 et 100 :      / \_ / \_ / \_ / personnes

## QUEL IMPACT DU CORONAVIRUS SUR VOTRE CUISINE ?

1  
2  
3  
4 **IC1. Combien de personnes vivent actuellement dans votre cuisine, y compris vous-même ?**

5 /\_/\_/\_/ personnes  
6

7 **IC2. Est-ce que des personnes qui vivent avec vous actuellement sont venues vous rejoindre à cause du**  
8 **Coronavirus ou du couvre-feu ?**  
9

- 10  1. Oui, à cause du Coronavirus  
11  2. Non, pour les récoltes ou le travail de la ferme  
12  3. Non, personne n'est venu nous rejoindre → Aller directement à la question IC7  
13

14  
15  
16 **↳ IC3. Si oui, combien ?** /\_/\_/\_/ personnes

17 Combien d'adultes ? /\_/\_/\_/ adultes

18 Combien d'enfants de moins de 15 ans ? /\_/\_/\_/ enfants  
19  
20  
21

22 **IC4. Quand ces personnes sont arrivées dans votre cuisine, avez-vous craint qu'elles soient malades du**  
23 **Coronavirus sans le savoir ?**  
24

- 25  1. Oui, tout à fait  2. Oui, plutôt  3. Non, plutôt pas  4. Non, pas du tout  
26  
27  
28  
29  
30  
31  
32  
33  
34  
35  
36  
37  
38  
39  
40  
41  
42  
43  
44  
45  
46  
47  
48  
49  
50  
51  
52  
53  
54  
55  
56  
57  
58  
59  
60

1  
2  
3 **IC5. Qui sont ces personnes qui sont venus vous rejoindre et sont-elles toujours là ? Les questions**  
4 **suyvantes**

5 **Personne 1 (adulte principal) :**

6 **A. Est-ce qu'il s'agit d'un homme ou d'une femme ?**  1. Homme  2. Femme

7 **B. Quel est son âge ?** |\_\_|\_\_| ans

8  
9 **C. D'où venait cette personne ?** \_\_\_\_\_

10  
11 **D. Quand cette personne est-elle arrivée ? (ou depuis combien de temps est-elle là ?)**

12 Arrivée le |\_\_|\_\_| **OU** présente depuis |\_\_|\_\_| mois / |\_\_|\_\_| semaines

13  
14 **E. Est-ce que cette personne est étudiante ?**

15  1. Oui  2. Non

16  
17 **F. Est-ce que cette personne avait un travail ou une activité économique avant de vous rejoindre ?**

18  1. Oui  2. Non

19  
20  
21 **↳ F1. Quelle était son activité principale (celle qui lui prend le plus de votre temps) ?** \_\_\_\_

22  
23  
24  
25 **F2. Est-ce que cette personne aidait la cuisine en envoyant de l'argent ?**

26  1. Oui, régulièrement  2. Oui, quand elle le pouvait  2. Non

27  
28 **G. Est-ce que cette personne est arrivée seule dans votre cuisine ?**

29  1. Oui  2. Non

30  
31  
32 **↳ G1. Combien d'adultes de 15 ans et plus l'accompagnait ?**

33 /\_/\_/\_/

34 **G2. Pour chaque adulte, quel est le lien de parenté avec la**

35  
36 **Personne 1 ?** \_\_\_\_\_

37 **G3. Combien d'enfants de moins de 15 ans l'accompagnait ?**

38 /\_/\_/\_/

39  
40 **G4. Quel âge ont les enfants ?** /\_/\_/\_/ /\_/\_/\_/ .....

41  
42  
43 **H. Est-ce que d'autres adultes, seuls ou accompagnés de leurs conjoints et enfants, sont venus vous**

44 **rejoindre ?**  1. Oui  2. Non

45  
46 **Pour chaque adulte, remplir une nouvelle fiche « Personne 2 » si d'autres sont présents**

47  
48  
49  
50  
51 **IC6. Est-ce que des personnes qui étaient venues vous rejoindre à cause du Coronavirus sont reparties**

52 **dans leur vie habituelle ?**  1. Oui  2. Non

53  
54  
55 **↳ Si oui, combien ?** /\_/\_/\_/\_/ personnes

56  
57  
58  
59 .....**Pourquoi sont-elles reparties ?**

60  1. La menace du Coronavirus était moins forte qu'on l'avait craint

2. Autre : \_\_\_\_\_

**Personne 1 (adulte principal) :**

A. Est-ce qu'il s'agit d'un homme ou d'une femme ?  1. Homme  2. Femme

B. Quel est son âge ? |\_|\_| ans

C. Combien de temps cette personne est-elle restée dans votre cuisine ?

D. Est-ce que cette personne est étudiante ?

1. Oui  2. Non

E. Où est reparti cette personne ? \_\_\_\_\_

F. Pourquoi est-ce que cette personne est repartie ?

1. La menace du Coronavirus était moins forte qu'on l'avait craint

2. Autre : \_\_\_\_\_

F. Est-ce que cette personne a un travail ou une activité économique qu'elle a retrouvé ?

1. Oui  2. Non

↳ F1. Quelle est son activité principale (celle qui lui prend le plus de votre temps) ? \_\_\_\_\_

F2. Actuellement, est-ce que cette personne aide la cuisine en envoyant de l'argent ?

1. Oui, régulièrement  2. Oui, quand elle le peut  2. Non

F2. Est-ce que cette personne aidait d'avantage la cuisine avant le Coronavirus ?

1. Oui  2. Non

G. Est-ce que cette personne est repartie seule ?

1. Oui  2. Non

↳ G1. Combien d'adultes de 15 ans et plus l'accompagnait ?

/\_/\_/

G2. Pour chaque adulte, quel est le lien de parenté avec la

Personne 1 ? \_\_\_\_\_

G2. Combien d'enfants de moins de 15 ans l'accompagnait ?

/\_/\_/

G3. Quel âge ont les enfants ? /\_/\_/ /\_/\_/ .....

**H. Est-ce que d'autres adultes, seuls ou accompagnés de leurs conjoints et enfants, sont venus vous rejoindre ?**

1. Oui  2. Non

**Pour chaque adulte, remplir une nouvelle fiche « Personne 2 » si d'autres sont présents**

**IC7. Est-ce que la vie dans votre cuisine est plus compliquée à cause du Coronavirus ?**

1. Oui, parce que nous sommes plus nombreux dans la cuisine
2. Oui, parce qu'il est difficile de vendre notre production au marché
3. Oui, parce qu'on a moins d'argent pour acheter ce dont on a besoin
4. Non, parce que nous sommes assez peu nombreux à vivre dans la cuisine
5. Non, parce que nous sommes plus nombreux à travailler
6. Autre : \_\_\_\_\_

**IC8. Avez-vous reçu une aide du gouvernement parce que vous étiez en difficulté à cause du Coronavirus ?**

1. Oui  2. Non

↳ Si oui, ...

**IC9. Avez-vous reçu une aide du maire parce que vous étiez en difficulté à cause du Coronavirus ?**

1. Oui  2. Non

↳ Si oui, de quoi s'agissait-il ? \_\_\_\_\_

**IC10. Avez-vous reçu une aide de personnes de bonne volonté ou de vos voisins parce que vous étiez en difficulté à cause du Coronavirus ?**

1. Oui  2. Non

↳ Si oui, de quoi s'agissait-il ? \_\_\_\_\_

**IC11. Vous-même, avez-vous aidé une autre cuisine qui était en difficulté à cause du Coronavirus ?**

1. Oui  2. Non

↳ Si oui, de quoi s'agissait-il ? \_\_\_\_\_

**IC14. A propos du Coronavirus, on entend beaucoup de choses. Etes-vous d'accord avec les affirmations suivantes ?****IC104A. Le COVID-19, c'est surtout une maladie de blanc.**

1. D'accord  2. Pas d'accord

**IC14B. Le COVID-19, c'est surtout une maladie des villes.**

1. D'accord  2. Pas d'accord

**IC14C. Le COVID-19, c'est juste une grippe.**

1. D'accord  2. Pas d'accord

**IC104D. Le COVID-19, c'est une punition divine.**

1. D'accord  2. Pas d'accord



1  
2  
3  
4  
5  
6  
7  
8  
9  
10  
11  
12  
13  
14  
15  
16  
17  
18  
19  
20  
21  
22  
23  
24  
25  
26  
27  
28  
29  
30  
31  
32  
33  
34  
35  
36  
37  
38  
39  
40  
41  
42  
43  
44  
45  
46  
47  
48  
49  
50  
51  
52  
53  
54  
55  
56  
57  
58  
59  
60

**IC14E. On peut se protéger ou guérir du COVID-19 en mangeant certains aliments (ail, gingembre, citron vert...).**

1. D'accord       2. Pas d'accord

**IC14F. On peut se protéger ou guérir du COVID-19 grâce à la prière.**

1. D'accord       2. Pas d'accord

**IC104G. On peut se protéger ou guérir du COVID-19 grâce à la médecine traditionnelle.**

1. D'accord       2. Pas d'accord

**IC14H. On peut se protéger ou guérir du COVID-19 grâce à des antibiotiques.**

1. D'accord       2. Pas d'accord

**IC14I. Le COVID-19 se transmet par les moustiques.**

1. D'accord       2. Pas d'accord

**IC14J. Le COVID-19 se transmet par l'air.**

1. D'accord       2. Pas d'accord

**IC14K. Le COVID-19 se transmet par les ondes 5G.**

1. D'accord       2. Pas d'accord

**IC14L. Le COVID-19 disparaît au soleil ou quand il fait chaud.**

1. D'accord       2. Pas d'accord

**POUR TERMINER...**

**D1. Comment vous sentez-vous aujourd'hui, sur une échelle de 0 à 10 (indiquez votre réponse entre 0 (Tout à fait mal) et 10 (Tout à fait bien))**

| Tout à fait mal |   |   |   |   |   |   |   |   |   | Tout à fait bien |  |
|-----------------|---|---|---|---|---|---|---|---|---|------------------|--|
| 0               | 1 | 2 | 3 | 4 | 5 | 6 | 7 | 8 | 9 | 10               |  |

**D2. Quel est votre statut matrimonial ?**

- 1. Marié(e)
- 2. Célibataire
- 3. Veuf(ve)
- 4. Divorcé(e)

**D3. Si vous êtes marié(e), êtes-vous dans une union...**

- 1. Polygame
- 2. Monogame
- 3. Non concerné (non marié)

**D4. Est-ce que votre (première) épouse est inquiète qu'un membre de votre cuisine attrape le coronavirus ?**

- 1. Très inquiète
- 2. Plutôt inquiète
- 3. Plutôt pas inquiète
- 4. Pas inquiète du tout

**D5. Comment votre (première) épouse voit-elle son risque d'attraper le Coronavirus ? Est-ce que pour elle, il est ?**

- 1. Très faible
- 2. Plutôt faible
- 3. Plutôt élevé
- 4. Très élevé

**D6. Par rapport aux femmes de son âge, comment votre (première) épouse voit-elle son risque d'attraper le Coronavirus est :**

- 1. Beaucoup moins importants que pour les autres femmes de son âge
- 2. Moins importants que pour les autres femmes de son âge
- 3. Ni plus ni moins importants que pour les autres femmes de son âge
- 4. Plus importants que pour les autres femmes de son âge
- 5. Beaucoup plus importants que pour les autres femmes de son âge

**D7. Combien d'enfants avez-vous ?** |\_|\_|

**D8. A propos des enfants, êtes-vous d'accord pour qu'ils retournent à l'école ?**

- 1. Oui, tout à fait
- 2. Oui, plutôt
- 3. Non, plutôt pas
- 4. Non, pas du tout

**Si D8=3ou4, Pourquoi ?** \_\_\_\_\_

1  
2  
3  
4  
5  
6  
7  
8  
9  
10  
11  
12  
13  
14  
15  
16  
17  
18  
19  
20  
21  
22  
23  
24  
25  
26  
27  
28  
29  
30  
31  
32  
33  
34  
35  
36  
37  
38  
39  
40  
41  
42  
43  
44  
45  
46  
47  
48  
49  
50  
51  
52  
53  
54  
55  
56  
57  
58  
59  
60

**D9. Vous-même, êtes-vous allé à l'école publique (quelquefois appelée école « française ») ?**

1. Oui       2. Non

↳ Jusqu'à quelle classe ? \_\_\_\_\_ OU Jusqu'à quel âge ? \_\_\_\_\_ OU Combien d'années ? \_\_\_\_\_

**D10. Etes-vous allée à l'école coranique ?**

1. Oui       2. Non

↳ Pendant combien d'années ? \_\_\_\_\_

**D11. Quelle est votre activité principale (celle qui vous prend le plus de votre temps) :**

---

**D12. Dans cette activité, vous travaillez comme :** (une seule réponse possible)

1. Fonctionnaire  
 2. Salarié avec un contrat écrit  
 3. Salarié avec un accord oral  
 4. Indépendant à votre compte et sans employé  
 5. Entrepreneur ou patron, avec employé(s)  
 6. Apprenti  
 7. Aide familiale

**D13. Si, au cours des 12 derniers mois, vous n'avez pas travaillé et vous n'avez pas eu d'activité économique, quelle est votre situation actuelle ?**

1. En recherche d'emploi  
 2. Personne âgée ne travaillant plus/ retraité(e)  
 3. Etude/ formation  
 4. Invalidité/ handicap permanent/ longue maladie  
 5. Autre sans occupation (personne au foyer)

## Epouse en charge : A PROPOS DU CORONAVIRUS...

### C1. Avez-vous déjà entendu parler du Coronavirus ?

1. Oui  2. Non → **Aller à la question IC1**

### C3. Est-ce que vous allez sur Internet pour avoir des informations sur le Coronavirus ?

1. Oui, tous les jours  
 2. Oui, quelques fois par semaine  
 3. Oui, de temps en temps  
 4. Non, jamais

### C4. Avez-vous acheté des masques au cours des 2 dernières semaines ? (plusieurs réponses possibles)

1. Oui, combien ? \_\_\_\_\_  
 2. Non, on a bénéficié de la distribution de masques  
 2. Non, on en a fabriqué nous-mêmes  
 3. Non et on n'en porte pas

### C5. Avez-vous acheté du gel hydroalcolique au cours des 2 dernières semaines ?

1. Oui  
 2. Non, mais j'aimerais en trouver  
 2. Non et je n'en ressens pas le besoin

### C6. Actuellement, êtes-vous inquiète qu'un membre de votre cuisine attrape le coronavirus ?

1. Très inquiète  2. Plutôt inquiète  3. Plutôt pas inquiète  4. Pas inquiète du tout

### C7. Avez-vous changé vos habitudes pour éviter que le Coronavirus arrive dans votre cuisine ? (plusieurs réponses possibles)

1. Vous n'avez rien changé à vos habitudes  
 2. Chacun doit se laver les mains à chaque fois que vous revenez à la cuisine  
 3. Chacun doit se laver les mains seulement quand vous revenez du marché ou du magasin  
 4. Chacun doit porter un masque pour aller au marché ou au magasin  
 5. Vous utilisez du désinfectant pour nettoyer la cuisine  
 6. Autre : \_\_\_\_\_

### C8. Pour vous-même, pensez-vous que votre risque d'attraper le Coronavirus est ?

1. Très faible  
 2. Plutôt faible  
 3. Plutôt élevé  
 4. Très élevé

### C9. Par rapport aux femmes de votre âge, est-ce que vous pensez que votre risque d'attraper le Coronavirus est ?

1. Beaucoup moins importants que pour les autres femmes de mon âge  
 2. Moins importants que pour les autres femmes de mon âge  
 3. Ni plus ni moins importants que pour les autres femmes de mon âge  
 4. Plus importants que pour les autres femmes de mon âge  
 5. Beaucoup plus importants que pour les autres femmes de mon âge

**C10. Est-ce que des personnes qui vivent avec vous actuellement sont venues vous rejoindre à cause du Coronavirus ?**

1. Oui, à cause du Coronavirus  
 2. Non, pour les récoltes ou le travail de la ferme  
 3. Non, personne n'est venu nous rejoindre

**Si C10=1,2 ou 3 : C10A. Quand ces personnes sont arrivées dans votre cuisine, avez-vous craint que certaines d'entre elles soient malades du Coronavirus sans le savoir ?**

1. Oui, tout à fait    2. Oui, plutôt    3. Non, plutôt pas    4. Non, pas du tout

**C11. Avez-vous pris des précautions pour éviter le Coronavirus dans votre cuisine ?**

1. Oui    2. Non

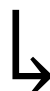

**Si oui, lesquelles ?** \_\_\_\_\_

**C12. Si vous ou un membre de votre famille attrapait le Coronavirus, où iriez-vous pour les soins ?**

1. Poste de Sante    2. Guérisseur    3. Autre ; Préciser \_\_\_\_\_

**C13. Pensez-vous à un médicament pour soigner le coronavirus ?**

1. Oui    2. Non

**C13A. Si oui, lequel ?** \_\_\_\_\_

**C14. En général, craignez-vous d'acheter de faux médicaments ?**

1. Oui, tout à fait    2. Oui, plutôt    3. Non, plutôt pas    4. Non, pas du tout

**C15. En général, êtes-vous réticente à l'idée de vous faire vacciner ?**

1. Oui, tout à fait    2. Oui, plutôt    3. Non, plutôt pas    4. Non, pas du tout

**C16. Si un vaccin contre le Coronavirus était disponible et gratuit, est-ce que vous voudriez vous faire vacciner ?**

1. Oui, certainement    2. Oui, probablement    3. Non, probablement pas    4. Non, certainement pas

**Si C16=3ou4 : C16A. Pour quelles raisons ne vous feriez-vous pas vacciner ?**

1. Vous êtes contre la vaccination en général  
 2. Vous pensez qu'un vaccin élaboré dans l'urgence est trop dangereux  
 3. Vous pensez que c'est inutile parce que le COVID-19 est peu dangereux  
 4. Autre : \_\_\_\_\_

**C17. Si un vaccin contre le Coronavirus était disponible et gratuit, est-ce que vous voudriez faire vacciner les enfants ?**

1. Oui, certainement    2. Oui, probablement    3. Non, probablement pas    4. Non, certainement pas

**C18. Connaissez-vous des personnes dans votre famille, ou parmi vos amis ou connaissances, qui sont, ou qui ont été malades du Coronavirus ?**

1. Oui, dans la famille    2. Oui, parmi les amis ou connaissances  
 3. Oui, à la fois dans la famille et parmi les amis ou connaissances    3. Non

**C19. Si C18=1 à 3 :, est-ce qu'il s'agit de personnes qui vivent actuellement avec vous ?**

1. Oui  2. Non

↳ **C19.A. Quel est votre lien de parenté avec cette ou ces personnes ?** \_\_\_\_\_

**C19.B. Avez-vous pris des précautions pour éviter d'être contaminés à votre tour par le Coronavirus ?**

2. Non, et personne l'a attrapé dans la cuisine  
 2. Non, mais une ou plusieurs personnes de la cuisine ont attrapé le Coronavirus  
 1. Oui : Lesquelles ? \_\_\_\_\_

**C19.C. Est-ce que la ou les personnes malades sont allées dans un centre de traitement ?**

1. Oui, toutes sont allées dans un centre de traitement  
 2. Non, certaines ont refusé d'aller dans un centre de traitement  
 2. Non, aucune n'est allée dans un centre de traitement

**C19.D. Est-ce que la ou les personnes malades sont aujourd'hui guéries ?**

1. Oui, toutes  2. Non, certaines ont des séquelles  2. Non, certaines sont décédées

↳ **C19.F. Comment est-ce que cette/ces personnes ont été soignées ?**

1. Toutes par Chloroquine  
 1. Certaines par Chloroquine et d'autres par médecine traditionnelle  
 2. Toutes par médecine traditionnelle  
 3. Autre : \_\_\_\_\_

**C20. Selon vous, est-ce que le couvre-feu dans le bassin de Niakhar est nécessaire pour limiter l'épidémie de Coronavirus ?**

1. Oui, tout à fait  2. Oui, plutôt  3. Non, plutôt pas  4. Non, pas du tout

**C21. Selon vous, est-ce que le couvre-feu dans les villes permet de limiter l'épidémie de Coronavirus ?**

1. Oui, tout à fait  2. Oui, plutôt  3. Non, plutôt pas  4. Non, pas du tout

**C22. Selon vous, qu'est-ce qui est préférable ?**

1. Imposer le couvre-feu seulement dans les zones où il y a des malades du Coronavirus  
 2. Imposer le couvre-feu dans tout le Sénégal pour que tous les citoyens vivent la même chose  
 3. Ne pas imposer de couvre-feu du tout parce qu'il y a peu de malades au Sénégal

**C23. Selon vous, dans combien de temps est-ce que l'épidémie de Coronavirus sera terminée au Sénégal ? (en mois ou en semaines)**

\_\_|\_\_| mois OU \_\_|\_\_| semaines

## QUELLE EST VOTRE PERCEPTION DES RISQUES DE CORONAVIRUS ?

### PR1. A quel point la possibilité d'attraper le Coronavirus vous inquiète-t-elle ?

Donnez une note entre 0 et 10 : la note 0 signifie que ça ne vous inquiète pas du tout, et la note 10 que ça vous inquiète énormément.

|   |   |   |   |   |   |   |   |   |   |    |
|---|---|---|---|---|---|---|---|---|---|----|
| 0 | 1 | 2 | 3 | 4 | 5 | 6 | 7 | 8 | 9 | 10 |
|---|---|---|---|---|---|---|---|---|---|----|

### PR2. Selon vous, quelle est la contagiosité du Coronavirus, c'est-à-dire la facilité avec laquelle ce virus peut se transmettre d'une personne à l'autre ?

Donnez une note entre 0 et 10 : la note 0 signifie que ça le Coronavirus est très peu contagieux et la note 10 qu'il est vraiment très contagieux.

|   |   |   |   |   |   |   |   |   |   |    |
|---|---|---|---|---|---|---|---|---|---|----|
| 0 | 1 | 2 | 3 | 4 | 5 | 6 | 7 | 8 | 9 | 10 |
|---|---|---|---|---|---|---|---|---|---|----|

### PR3. Selon vous, quelle est la gravité du Coronavirus ?

Donnez une note entre 0 et 10 : la note 0 signifie qu'attraper le Coronavirus n'est pas du tout grave et la note 10 que c'est vraiment très grave.

|   |   |   |   |   |   |   |   |   |   |    |
|---|---|---|---|---|---|---|---|---|---|----|
| 0 | 1 | 2 | 3 | 4 | 5 | 6 | 7 | 8 | 9 | 10 |
|---|---|---|---|---|---|---|---|---|---|----|

### PR4. Selon vous, sur 100 personnes qui attrapent le Coronavirus, combien d'entre elles pourraient mourir des suites de la maladie ?

Donnez un nombre entre 0 et 100 :

/ \_ / \_ / \_ / personnes

## ET POUR LE PALUDISME ?

### PR1BIS. A quel point la possibilité d'attraper le paludisme vous inquiète-t-il ?

Donnez une note entre 0 et 10 : la note 0 signifie que ça ne vous inquiète pas du tout, et la note 10 que ça vous inquiète énormément.

|   |   |   |   |   |   |   |   |   |   |    |
|---|---|---|---|---|---|---|---|---|---|----|
| 0 | 1 | 2 | 3 | 4 | 5 | 6 | 7 | 8 | 9 | 10 |
|---|---|---|---|---|---|---|---|---|---|----|

### PR3BIS. Selon vous, quelle est la gravité du paludisme ?

Donnez une note entre 0 et 10 : la note 0 signifie qu'attraper le paludisme n'est pas du tout grave et la note 10 que c'est vraiment très grave.

|   |   |   |   |   |   |   |   |   |   |    |
|---|---|---|---|---|---|---|---|---|---|----|
| 0 | 1 | 2 | 3 | 4 | 5 | 6 | 7 | 8 | 9 | 10 |
|---|---|---|---|---|---|---|---|---|---|----|

### PR4BIS. Selon vous, sur 100 personnes qui attrapent le paludisme, combien d'entre elles pourraient mourir des suites de la maladie ?

Donnez un nombre entre 0 et 100 :

/ \_ / \_ / \_ / personnes

## QUEL IMPACT DU CORONAVIRUS SUR VOTRE CUISINE ?

### IC1. Comment évaluez-vous l'impact de l'épidémie de Coronavirus sur votre vie personnelle en général ?

1. C'est très négatif
2. Il y a plus de mauvais que du bon
3. En fait, ça ne change pas grand chose par rapport à ma vie d'avant
4. Il y a plus de bon que de mauvais
5. C'est très positif

### IC2. Comment évaluez-vous l'impact de l'épidémie de Coronavirus sur la cuisine ?

1. C'est très négatif
2. Il y a plus de mauvais que du bon
3. En fait, ça ne change pas grand chose par rapport à avant
4. Il y a plus de bon que de mauvais
5. C'est très positif

### IC3. Est-ce qu'à cause du couvre-feu, il est plus difficile qu'avant d'acheter ce dont vous avez besoin ?

1. Oui, parce que les prix ont augmenté
2. Oui, parce qu'on trouve plus difficilement ce qu'on cherche
3. Oui, pour d'autres raisons ; Lesquelles : \_\_\_\_\_
4. Non

### IC4. Est-ce qu'à cause du couvre-feu, il est plus difficile qu'avant de vendre votre production ?

1. Oui, parce que les gros marchés sont fermés
2. Oui, parce que vous n'arrivez pas à vendre vos produits au prix qu'ils devraient avoir
3. Oui, pour d'autres raisons ; Lesquelles : \_\_\_\_\_
4. Non

### IC5. Actuellement, est-ce que c'est compliqué de nourrir tout le monde dans la cuisine ?

1. Oui, tout à fait     2. Oui, plutôt     3. Non, plutôt pas     4. Non, pas du tout

### IC6. Si IC3=1 à 3 : Selon vous, est-ce que vous avez ces difficultés à cause du Coronavirus ?

1. Oui, tout à fait     2. Oui, plutôt     3. Non, plutôt pas     4. Non, pas du tout

### IC7. On entend beaucoup de choses à propos du Coronavirus. Etes-vous d'accord avec les affirmations suivantes ?

#### IC7A. Le COVID-19, c'est surtout une maladie de blanc.

1. D'accord     2. Pas d'accord

#### IC7B. Le COVID-19, c'est surtout une maladie des villes.

1. D'accord     2. Pas d'accord

#### IC7C. Le COVID-19, c'est juste une grippe.

1. D'accord     2. Pas d'accord

#### IC7D. Le COVID-19, c'est une punition divine.

1. D'accord     2. Pas d'accord

#### IC7E. On peut se protéger ou guérir du COVID-19 en mangeant certains aliments (ail, gingembre ...).

1. D'accord     2. Pas d'accord

#### IC7F. On peut se protéger ou guérir du COVID-19 grâce à la prière.

1. D'accord     2. Pas d'accord



1 **IC7G. On peut se protéger ou guérir du COVID-19 grâce à la médecine traditionnelle.**

- 2  1. D'accord  2. Pas d'accord

3 **IC7H. On peut se protéger ou guérir du COVID-19 grâce à des antibiotiques.**

- 4  1. D'accord  2. Pas d'accord

5 **IC7I. Le COVID-19 se transmet par les moustiques.**

- 6  1. D'accord  2. Pas d'accord

7 **IC7J. Le COVID-19 se transmet par l'air.**

- 8  1. D'accord  2. Pas d'accord

9 **IC7K. Le COVID-19 se transmet par les ondes 5G.**

- 10  1. D'accord  2. Pas d'accord

11 **IC7L. Le COVID-19 disparaît au soleil ou quand il fait chaud.**

- 12  1. D'accord  2. Pas d'accord

13  
14  
15  
16  
17  
18  
19  
20  
21  
22  
23  
24  
25  
26  
27  
28  
29  
30  
31  
32  
33  
34  
35  
36  
37  
38  
39  
40  
41  
42  
43  
44  
45  
46  
47  
48  
49  
50  
51  
52  
53  
54  
55  
56  
57  
58  
59  
60

For peer review only

## POUR TERMINER...

**D1. Comment vous sentez-vous aujourd'hui, sur une échelle de 0 à 10 (indiquez votre réponse entre 0 (Tout à fait mal) et 10 (Tout à fait bien))**

|  | Tout à fait mal |   |   |   |   |   |   |   |   | Tout à fait bien |    |
|--|-----------------|---|---|---|---|---|---|---|---|------------------|----|
|  | 0               | 1 | 2 | 3 | 4 | 5 | 6 | 7 | 8 | 9                | 10 |

**D2. Est-ce que votre mari est inquiet qu'un membre de votre cuisine attrape le Coronavirus ?**

1. Très inquiet     2. Plutôt inquiet     3. Plutôt pas inquiet     4. Pas inquiet du tout

**D3. Comment votre mari voit-il son risque d'attraper le Coronavirus ? Est-ce que pour lui, son risque est ?**

1. Très faible  
 2. Plutôt faible  
 3. Plutôt élevé  
 4. Très élevé

**D4. Par rapport aux hommes de son âge, comment votre mari voit-il son risque d'attraper le Coronavirus ? Est-ce que pour lui, son risque est ?**

1. Beaucoup moins importants que pour les autres hommes de son âge  
 2. Moins importants que pour les autres hommes de son âge  
 3. Ni plus ni moins importants que pour les autres hommes de son âge  
 4. Plus importants que pour les autres hommes de son âge  
 5. Beaucoup plus importants que pour les autres hommes de son âge

**D5. A propos des enfants, êtes-vous d'accord pour qu'ils retournent à l'école ?**

1. Oui, tout à fait     2. Oui, plutôt     3. Non, plutôt pas     4. Non, pas du tout

**Si D5=3 ou 4, Pourquoi ?** \_\_\_\_\_

**D6. Vous-même, êtes-vous allée à l'école publique (quelquefois appelée école « française ») ?**

1. Oui     2. Non

↳ **Jusqu'à quelle classe ?** \_\_\_\_\_ **OU** **Jusqu'à quel âge ?** \_\_\_\_\_ **OU** **Combien d'années ?** \_\_\_\_\_

**D7. Êtes-vous allée à l'école coranique ?**

1. Oui     2. Non

↳ **Pendant combien d'années ?** \_\_\_\_\_

## Nouvel arrivant : A PROPOS DU CORONAVIRUS...

**C1. Confirmez-vous que vous vivez actuellement dans la cuisine à cause du Coronavirus ?**

1. Oui  2. Non

↳ **C1A. Quelle est la principale raison qui vous a poussé(e) à rejoindre la cuisine ?**

1. La peur d'attraper le Coronavirus  
 2. La peur de ne plus gagner assez d'argent pour vivre  
 .... 3. Autre : \_\_\_\_\_

**C2. Etes-vous étudiant ?**

1. Oui  2. Non

↳ **C2A. Quelle est la principale raison qui vous a poussé(e) à rejoindre la cuisine ?**

1. La peur d'attraper le Coronavirus  
 2. La peur de ne plus gagner assez d'argent pour vivre  
 .... 3. Autre : \_\_\_\_\_

**Si C1=2 et C2=2, alors STOP.**

**C3. Est-ce que vous allez sur Internet pour avoir des informations sur le Coronavirus ?**

1. Oui, tous les jours  
 2. Oui, quelques fois par semaine  
 3. Oui, de temps en temps  
 4. Non, jamais

**C4. Quand vous êtes arrivé(e) dans la cuisine, est-ce que vous aviez-vous peur d'être malade du Coronavirus sans le savoir ?**

1. Oui, tout à fait  2. Oui, plutôt  3. Non, plutôt pas  4. Non, pas du tout

**C5. A votre arrivée, est-ce que des précautions ont été prises pour éviter le Coronavirus ?**

1. Oui  2. Non

↳ **C5.A. Est-ce que vous dormiez à l'écart des autres membres de la famille ?**

1. Oui  2. Non

**C5.B. Est-ce que vous preniez vos repas à l'écart des autres membres de la famille ?**

1. Oui  2. Non

**C5.C. Au bout de combien de temps avez-vous pu vous joindre au reste de la famille ?**

/ \_\_ / \_\_ / jours

**C5.D. Est-ce que cette expérience a été difficile ?**

1. Oui, tout à fait  2. Oui, plutôt  3. Non, plutôt pas  4. Non, pas du tout

**C6. Actuellement, êtes-vous inquiet qu'un membre de la cuisine attrape le coronavirus ?**

1. Très inquiet     2. Plutôt inquiet     3. Plutôt pas inquiet     4. Pas inquiet du tout

**C7. Pour vous-même, pensez-vous que votre risque d'attraper le Coronavirus est ?**

1. Très faible  
 2. Plutôt faible  
 3. Plutôt élevé  
 4. Très élevé

**C8. Par rapport aux hommes/femmes de votre âge, est-ce que vous pensez que votre risque d'attraper le Coronavirus est :**

1. Beaucoup moins importants que pour les autres hommes/femmes de mon âge  
 2. Moins importants que pour les autres hommes/femmes de mon âge  
 3. Ni plus ni moins importants que pour les autres hommes/femmes de mon âge  
 4. Plus importants que pour les autres hommes/femmes de mon âge  
 5. Beaucoup plus importants que pour les autres hommes/femmes de mon âge

**C9. Si vous ou un membre de votre famille attrapait le Coronavirus, où iriez-vous pour les soins ?**

1. Poste de Santé     2. Guérisseur     3. Autre ; Préciser \_\_\_\_\_

**C10. Pensez-vous à un médicament pour soigner le coronavirus ?**

1. Oui     2. Non

**C10A. Si oui, lequel ?** \_\_\_\_\_

**C11. En général, craignez-vous d'acheter de faux médicaments ?**

1. Oui, tout à fait     2. Oui, plutôt     3. Non, plutôt pas     4. Non, pas du tout

**C12. En général, êtes-vous réticent(e) à l'idée de vous faire vacciner ?**

1. Oui, tout à fait     2. Oui, plutôt     3. Non, plutôt pas     4. Non, pas du tout

**C13. Si un vaccin contre le Coronavirus était disponible et gratuit, est-ce que vous voudriez vous faire vacciner ?**

1. Oui, certainement     2. Oui, probablement     3. Non, probablement pas     4. Non, certainement pas

**Si C16=3 ou 4 : C16A. Pour quelles raisons ne vous feriez-vous pas vacciner ?**

1. Vous êtes contre la vaccination en général  
 2. Vous pensez qu'un vaccin élaboré dans l'urgence est trop dangereux  
 3. Vous pensez que c'est inutile parce que le COVID-19 est peu dangereux  
 4. Autre : \_\_\_\_\_

**C14. Si un vaccin contre le Coronavirus était disponible et gratuit, est-ce que vous voudriez faire vacciner vos enfants ?**

1. Oui, certainement     2. Oui, probablement     3. Non, probablement pas     4. Non, certainement pas

1  
2  
3  
4  
5  
6  
7  
8  
9  
10  
11  
12  
13  
14  
15  
16  
17  
18  
19  
20  
21  
22  
23  
24  
25  
26  
27  
28  
29  
30  
31  
32  
33  
34  
35  
36  
37  
38  
39  
40  
41  
42  
43  
44  
45  
46  
47  
48  
49  
50  
51  
52  
53  
54  
55  
56  
57  
58  
59  
60

**C16. Connaissez-vous des personnes dans votre famille, ou parmi vos amis ou connaissances, qui sont, ou qui ont été malades du Coronavirus ?**

1. Oui, dans la famille     2. Oui, parmi les amis ou connaissances  
 3. Oui, à la fois dans la famille et parmi les amis ou connaissances     3. Non

**C17. Selon vous, est-ce que le couvre-feu dans le bassin de Niakhar est nécessaire pour limiter l'épidémie de Coronavirus?**

1. Oui, tout à fait     2. Oui, plutôt     3. Non, plutôt pas     4. Non, pas du tout

**C18. Selon vous, est-ce que le couvre-feu dans les villes permet de limiter l'épidémie de Coronavirus ?**

1. Oui, tout à fait     2. Oui, plutôt     3. Non, plutôt pas     4. Non, pas du tout

**C19. Selon vous, qu'est-ce qui est préférable ?**

1. Imposer le couvre-feu seulement dans les zones où il y a des malades du Coronavirus  
 2. Imposer le couvre-feu dans tout le Sénégal pour que tous les citoyens vivent la même chose  
 3. Ne pas imposer de couvre-feu du tout parce qu'il y a peu de malades au Sénégal

**C20. Selon vous, dans combien de temps est-ce que l'épidémie de Coronavirus sera terminée ?  
(en mois ou en semaines)**

| mois    **OU**      | semaines

## QUELLE EST VOTRE PERCEPTION DES RISQUES DE CORONAVIRUS ?

### PR1. A quel point la possibilité d'attraper le Coronavirus vous inquiète-t-elle ?

Donnez une note entre 0 et 10 : la note 0 signifie que ça ne vous inquiète pas du tout, et la note 10 que ça vous inquiète énormément.

|   |   |   |   |   |   |   |   |   |   |    |
|---|---|---|---|---|---|---|---|---|---|----|
| 0 | 1 | 2 | 3 | 4 | 5 | 6 | 7 | 8 | 9 | 10 |
|---|---|---|---|---|---|---|---|---|---|----|

### PR2. Selon vous, quelle est la contagiosité du Coronavirus, c'est-à-dire la facilité avec laquelle ce virus peut se transmettre d'une personne à l'autre ?

Donnez une note entre 0 et 10 : la note 0 signifie que le Coronavirus est très peu contagieux et la note 10 qu'il est vraiment très contagieux.

|   |   |   |   |   |   |   |   |   |   |    |
|---|---|---|---|---|---|---|---|---|---|----|
| 0 | 1 | 2 | 3 | 4 | 5 | 6 | 7 | 8 | 9 | 10 |
|---|---|---|---|---|---|---|---|---|---|----|

### PR3. Selon vous, quelle est la gravité du Coronavirus ?

Donnez une note entre 0 et 10 : la note 0 signifie qu'attraper le Coronavirus n'est pas du tout grave et la note 10 que c'est vraiment très grave.

|   |   |   |   |   |   |   |   |   |   |    |
|---|---|---|---|---|---|---|---|---|---|----|
| 0 | 1 | 2 | 3 | 4 | 5 | 6 | 7 | 8 | 9 | 10 |
|---|---|---|---|---|---|---|---|---|---|----|

### PR4. Selon vous, sur 100 personnes qui attrapent le Coronavirus, combien d'entre elles pourraient mourir des suites de la maladie ?

Donnez un nombre entre 0 et 100 :      / \_ / \_ / \_ / personnes

## ET POUR LE PALUDISME ?

### PR1BIS. A quel point la possibilité d'attraper le paludisme vous inquiète-t-il ?

Donnez une note entre 0 et 10 : la note 0 signifie que ça ne vous inquiète pas du tout, et la note 10 que ça vous inquiète énormément.

|   |   |   |   |   |   |   |   |   |   |    |
|---|---|---|---|---|---|---|---|---|---|----|
| 0 | 1 | 2 | 3 | 4 | 5 | 6 | 7 | 8 | 9 | 10 |
|---|---|---|---|---|---|---|---|---|---|----|

### PR3BIS. Selon vous, quelle est la gravité du paludisme ?

Donnez une note entre 0 et 10 : la note 0 signifie qu'attraper le paludisme n'est pas du tout grave et la note 10 que c'est vraiment très grave.

|   |   |   |   |   |   |   |   |   |   |    |
|---|---|---|---|---|---|---|---|---|---|----|
| 0 | 1 | 2 | 3 | 4 | 5 | 6 | 7 | 8 | 9 | 10 |
|---|---|---|---|---|---|---|---|---|---|----|

### PR4BIS. Selon vous, sur 100 personnes qui attrapent le paludisme, combien d'entre elles pourraient mourir des suites de la maladie ?

Donnez un nombre entre 0 et 100 :      / \_ / \_ / \_ / personnes

**D1. Comment évaluez-vous l'impact de l'épidémie de Coronavirus sur votre vie personnelle en général ?**

- 1. C'est très négatif
- 2. Il y a plus de mauvais que du bon
- 3. En fait, ça ne change pas grand chose par rapport à ma vie d'avant
- 4. Il y a plus de bon que de mauvais
- 5. C'est très positif

**D2. Comment évaluez-vous l'impact de l'épidémie de Coronavirus sur la cuisine ?**

- 1. C'est très négatif
- 2. Il y a plus de mauvais que du bon
- 3. En fait, ça ne change pas grand chose par rapport à avant
- 4. Il y a plus de bon que de mauvais
- 5. C'est très positif

**D3. A propos du Coronavirus, on entend beaucoup de choses. Etes-vous d'accord avec les affirmations suivantes ?**

**D3A. Le COVID-19, c'est surtout une maladie de blanc.**

- 1. D'accord
- 2. Pas d'accord

**D3B. Le COVID-19, c'est surtout une maladie des villes.**

- 1. D'accord
- 2. Pas d'accord

**D3C. Le COVID-19, c'est juste une grippe.**

- 1. D'accord
- 2. Pas d'accord

**D3D. Le COVID-19, c'est une punition divine.**

- 1. D'accord
- 2. Pas d'accord

**D3E. On peut se protéger ou guérir du COVID-19 en mangeant certains aliments (ail, gingembre, citron vert...).**

- 1. D'accord
- 2. Pas d'accord

**D3F. On peut se protéger ou guérir du COVID-19 grâce à la prière.**

- 1. D'accord
- 2. Pas d'accord

**D3G. On peut se protéger ou guérir du COVID-19 grâce à la médecine traditionnelle.**

- 1. D'accord
- 2. Pas d'accord

**D3H. On peut se protéger ou guérir du COVID-19 grâce à des antibiotiques.**

- 1. D'accord
- 2. Pas d'accord

**D3I. Le COVID-19 se transmet par les moustiques.**

- 1. D'accord
- 2. Pas d'accord

**D3J. Le COVID-19 se transmet par l'air.**

- 1. D'accord
- 2. Pas d'accord

**D3K. Le COVID-19 se transmet par les ondes 5G.**

- 1. D'accord
- 2. Pas d'accord

**D3L. Le COVID-19 disparaît au soleil ou quand il fait chaud.**

- 1. D'accord
- 2. Pas d'accord

**POUR TERMINER...**

**D1. Comment vous sentez-vous aujourd'hui, sur une échelle de 0 à 10 (indiquez votre réponse entre 0 (Tout à fait mal) et 10 (Tout à fait bien))**

| Tout à fait mal |   |   |   |   |   |   |   |   | Tout à fait bien |    |
|-----------------|---|---|---|---|---|---|---|---|------------------|----|
| 0               | 1 | 2 | 3 | 4 | 5 | 6 | 7 | 8 | 9                | 10 |

**D2. Selon vous, est-ce que le chef de ménage et sa (première) épouse sont inquiets qu'un membre de la cuisine attrape le Coronavirus ?**

1. Très inquiets     2. Plutôt inquiets     3. Plutôt pas inquiets     4. Pas inquiets du tout

**D3. Quel est votre statut matrimonial ?**

1. Marié(e)  
 2. Célibataire  
 3. Veuf(ve)  
 4. Divorcé(e)

**D4. Si vous êtes marié(e), êtes-vous dans une union...**

1. Polygame  
 2. Monogame  
 3. Non concerné (non marié)

**D5. Avez-vous des enfants ?**

1. Oui     2. Non

**D6. Si D4=1 : Combien ? \_\_\_\_\_ de quel(s) âge(s) ? \_\_\_\_\_**

**D7. Quelle est votre activité principale (celle qui vous prend le plus de votre temps) : \_\_\_\_\_**

**D8. Dans cette activité, vous travaillez comme : (une seule réponse possible)**

1. Fonctionnaire  
 2. Salarié avec un contrat écrit  
 3. Salarié avec un accord oral  
 4. Indépendant à votre compte et sans employé  
 5. Entrepreneur ou patron, avec employé(s)  
 6. Apprenti  
 7. Aide familiale

**D9. Est-ce que votre activité est dans le secteur ?**

1. Des transports  
 2. De la pêche  
 3. Du tourisme  
 3. Non, un autre secteur

**D10. Si, au cours des 12 derniers mois, vous n'avez pas travaillé et vous n'avez pas eu d'activité économique, quelle est votre situation actuelle ?**

1. En recherche d'emploi  
 2. Personne âgée ne travaillant plus/ retraité(e)  
 3. Etude/ formation  
 4. Invalidité/ handicap permanent/ longue maladie  
 5. Autre sans occupation (personne au foyer)



# BMJ Open

## COVID-19-related attitudes, risk perceptions, preventive behaviours and economic impact in Sub-Saharan African countries: Implementing a longitudinal phone-based survey protocol in rural Senegalese households

|                                 |                                                                                                                                                                                                                                                                                                                                                                                                                                                                                                                                                                                                                                                                          |
|---------------------------------|--------------------------------------------------------------------------------------------------------------------------------------------------------------------------------------------------------------------------------------------------------------------------------------------------------------------------------------------------------------------------------------------------------------------------------------------------------------------------------------------------------------------------------------------------------------------------------------------------------------------------------------------------------------------------|
| Journal:                        | <i>BMJ Open</i>                                                                                                                                                                                                                                                                                                                                                                                                                                                                                                                                                                                                                                                          |
| Manuscript ID                   | bmjopen-2021-050090.R2                                                                                                                                                                                                                                                                                                                                                                                                                                                                                                                                                                                                                                                   |
| Article Type:                   | Protocol                                                                                                                                                                                                                                                                                                                                                                                                                                                                                                                                                                                                                                                                 |
| Date Submitted by the Author:   | 29-May-2021                                                                                                                                                                                                                                                                                                                                                                                                                                                                                                                                                                                                                                                              |
| Complete List of Authors:       | Seror, Valerie; IRD, VITROME; Aix-Marseille Universite Maradan, Gwenaëlle; INSERM, UMR912 (SESSTIM), 13006; Aix Marseille Université, UMR_S912, IRD, 13006 Ba, EH; Campus Universitaire de l'IRD Cortaredona, Sebastien; INSERM, UMR912 "Economics and Social Sciences Applied to Health & Analysis of Medical Information" (SESSTIM); ORS PACA, Southeastern Health Regional Observatory Berenger, Cyril; INSERM, UMR912 "Economics and Social Sciences Applied to Health & Analysis of Medical Information" (SESSTIM); ORS PACA, Southeastern Health Regional Observatory L'Haridon, O; University of Rennes 1; CNRS Sokhna, C; VITROME; Campus Universitaire de l'IRD |
| <b>Primary Subject Heading</b>: | Public health                                                                                                                                                                                                                                                                                                                                                                                                                                                                                                                                                                                                                                                            |
| Secondary Subject Heading:      | Global health, Health economics                                                                                                                                                                                                                                                                                                                                                                                                                                                                                                                                                                                                                                          |
| Keywords:                       | COVID-19, Public health < INFECTIOUS DISEASES, PUBLIC HEALTH, TROPICAL MEDICINE, HEALTH ECONOMICS                                                                                                                                                                                                                                                                                                                                                                                                                                                                                                                                                                        |
|                                 |                                                                                                                                                                                                                                                                                                                                                                                                                                                                                                                                                                                                                                                                          |

SCHOLARONE™  
Manuscripts



I, the Submitting Author has the right to grant and does grant on behalf of all authors of the Work (as defined in the below author licence), an exclusive licence and/or a non-exclusive licence for contributions from authors who are: i) UK Crown employees; ii) where BMJ has agreed a CC-BY licence shall apply, and/or iii) in accordance with the terms applicable for US Federal Government officers or employees acting as part of their official duties; on a worldwide, perpetual, irrevocable, royalty-free basis to BMJ Publishing Group Ltd ("BMJ") its licensees and where the relevant Journal is co-owned by BMJ to the co-owners of the Journal, to publish the Work in this journal and any other BMJ products and to exploit all rights, as set out in our [licence](#).

The Submitting Author accepts and understands that any supply made under these terms is made by BMJ to the Submitting Author unless you are acting as an employee on behalf of your employer or a postgraduate student of an affiliated institution which is paying any applicable article publishing charge ("APC") for Open Access articles. Where the Submitting Author wishes to make the Work available on an Open Access basis (and intends to pay the relevant APC), the terms of reuse of such Open Access shall be governed by a Creative Commons licence – details of these licences and which [Creative Commons](#) licence will apply to this Work are set out in our licence referred to above.

Other than as permitted in any relevant BMJ Author's Self Archiving Policies, I confirm this Work has not been accepted for publication elsewhere, is not being considered for publication elsewhere and does not duplicate material already published. I confirm all authors consent to publication of this Work and authorise the granting of this licence.

1  
2  
3  
4  
5  
6  
7  
8  
9  
10  
11  
12  
13  
14  
15  
16  
17  
18  
19  
20  
21  
22  
23  
24  
25  
26  
27  
28  
29  
30  
31  
32  
33  
34  
35  
36  
37  
38  
39  
40  
41  
42  
43  
44  
45  
46  
47  
48  
49  
50  
51  
52  
53  
54  
55  
56  
57  
58  
59  
60

**COVID-19-related attitudes, risk perceptions, preventive behaviours and economic impact in Sub-Saharan African countries: Implementing a longitudinal phone-based survey protocol in rural Senegalese households**

**Seror V<sup>1,2</sup>, Maradan G<sup>3</sup>, Ba EH<sup>4</sup>, Cortaredona S<sup>1,2</sup>, Berenger C<sup>3</sup>, L'Haridon O<sup>5,6</sup>, Sokhna C<sup>1,2,4</sup> and the CO3ELSER group**

<sup>1</sup> Aix Marseille Univ, IRD, AP-HM, SSA, VITROME, Marseille, France.

<sup>2</sup> IHU-Méditerranée Infection, Marseille, France.

<sup>3</sup> ORS PACA, Southeastern Health Regional Observatory, 13006, Marseille, France.

<sup>4</sup> VITROME, Campus Universitaire de l'IRD, Hann, Dakar, Senegal

<sup>5</sup> Faculty of Economics, University of Rennes 1, Rennes, France.

<sup>6</sup> Univ Rennes, CNRS, CREM UMR 6211, Rennes

**Corresponding author:**

Valérie Seror  
VITROME  
IHU Méditerranée Infection  
19-21 bd Jean Moulin  
13005 Marseille  
Tel. +33413732412 valerie.seror@inserm.fr

## Abstract

**Introduction.** Rural areas are considered safe havens against the increased spread of COVID-19 and associated restrictive measures, especially in contexts where public authorities are not in a position to systematically and substantially ease COVID-19-induced economic shocks. In the current Sub-Saharan Africa context, still marked by uncertainty surrounding the spread of COVID-19, we present the protocol of an ongoing longitudinal study aimed at investigating COVID-19-related attitudes, risks perceptions, preventive behaviours, and economic impact in rural areas in Senegal.

**Methods and analysis.** A prospective randomized longitudinal study of 600 households located in three semi-urban villages and nine randomly selected rural villages in the Niakhar area (located 135 km East of Dakar). Three ad hoc phone surveys are administered to 600 heads of households, their housewives in charge of managing the household and a relative living temporarily in the household, respectively. In addition to sharing identical sets of questions on several topics (risks perceptions, attitudes to curfew, attitudes to vaccines, beliefs about COVID-19 infection), the three separate survey questionnaires also include other topics (economic impact, local preventive strategies) whose related questions differ between questionnaires. As analysing evolutions is the study's primary focus, data on all the topics covered will be collected in three waves unless the spread of COVID-19 by mid-2021 justifies extending data collection. The present article presents the study protocol and details about the implementation of the first wave of data collection which started in July 2020. The decision to wait before presenting the protocol was based on the unprecedented context the COVID-19 pandemic.

**Ethics and dissemination.** The survey's protocol was approved by the Senegalese National Ethical Committee for Research in Health (131/MSAS/CNERS/Sec) and received authorisation from both the Senegalese Ministry of Health (619/MSAS/DPRS/DR) and the French Commission on Information Technology and Liberties (CNIL 2220771).

**Keywords:** COVID-19; attitudes; risk perceptions; preventive behaviours; economic impact; Sub-Saharan African ; longitudinal ; survey protocol.

## Article Summary

- The current Sub-Saharan African (SSA) context is still marked by uncertainty surrounding the spread of the COVID-19 pandemic and the scarce availability of individual data.
- This ongoing longitudinal study aims to investigate COVID-19-related attitudes, risk perceptions, preventive behaviours, and the economic impact in Senegalese rural areas.
- Three waves of data collection are planned (the first wave started in July 2020). However, this number may increase if the spread of COVID-19 by mid-2021 justifies extending data collection over a longer period of time.
- In the unprecedented context of the COVID-19 pandemic, the generalizability of the study's results needs to be explored.

## Introduction

After spreading from China to other Asian countries in late 2019, COVID-19 appeared in Western Europe in January 2020 where it rapidly led to overwhelmed hospitals and an exponential increase in deaths (COVID-19 data repository of the Johns Hopkins Center for Systems Science and Engineering, Baltimore, MD, USA). While most European countries adopted lockdown measures only several weeks after the first COVID-19 cases were reported (e.g., a 6-week delay in Italy and a 7-week delay in France), many Sub-Saharan African (SSA) countries decided to act sooner before the outbreak spread.

### **Spread of COVID-19 still limited in SSA, but uncertainties remain about how the pandemic will evolve**

The COVID-19 pandemic spread to SSA in February/March 2020. Senegal implemented restrictive measures (curfew, closing schools, banning of public gatherings, and cancellation of major national and religious celebrations) three weeks after the first COVID-19 cases had been reported in the country, whereas in Nigeria, a street publicity awareness campaign on COVID-19 preventive measures was launched in the capital Lagos, two days after the first cases had been identified. Concerns were expressed, especially in Senegal and Burkina Faso, with respect to the sharp increases in both these countries in the number of COVID-19 cases soon after the first cases were confirmed there <sup>1</sup>.

The announcements of restrictive measures led to mass movements of people from big cities to rural villages, both caused by fear of COVID-19 and the impact it could have in terms of economic losses. However, as time went by, it increasingly appeared that the outbreak was much less devastating than initially anticipated <sup>2</sup>, and the mass movements of people mentioned above were gradually reversed. Apart from the early adoption of restrictive measures, the most widely proposed hypothesis for the much lower spread of COVID-19 in SSA than in most other world regions is that different demographic characteristics (younger average ages, lower

1  
2  
3 population densities, and lower urbanization rates)<sup>3-6</sup>, and a higher immune response in relation  
4  
5 with more highly solicited immune systems<sup>7</sup> hamper the spread. Recently, another strong  
6  
7 hypothesis has been put forward, suggesting that the extensive implementation of local  
8  
9 preventive strategies may have played a crucial role in substantially lowering the spread of the  
10  
11 disease<sup>8,9</sup>.

12  
13  
14  
15 Nevertheless, the possibility cannot be ruled out that the COVID-19 pandemic could spread  
16  
17 throughout SSA countries<sup>2,10</sup>, as it did (and still continues to do) in North African and European  
18  
19 countries (i.e., all the countries north of SSA (see the Johns Hopkins Coronavirus world map:  
20  
21 <https://www.arcgis.com/apps/opsdashboard/index.html#/bda7594740fd40299423467b48e9ecf>  
22  
23 6)). Such a development is of great concern because of the associated risk of overwhelming  
24  
25 already fragile healthcare systems<sup>1,11</sup> in a context where the pandemic has brought about a  
26  
27 worldwide economic crisis whose consequences might be severe for SSA<sup>12</sup>.

### 31 32 **Few COVID-19 data are available from an individual perspective**

33  
34 Most published analyses to date on the COVID-19 pandemic in SSA countries have not been  
35  
36 supported by collected data, except for data on the numbers of confirmed cases and deaths. One  
37  
38 study conducted in seven English-speaking countries (Ghana, Kenya, South Africa, Tanzania,  
39  
40 Uganda and the English-speaking regions of Cameroon) assessed the extent to which these  
41  
42 populations were exposed to COVID-19-related misinformation. Using an online survey (April-  
43  
44 May 2020), it showed that false beliefs were shared by between 15 and 30% of the respondents,  
45  
46 depending on the false statement assessed, with a higher likelihood of false beliefs in older and  
47  
48 unemployed respondents<sup>13</sup>. In addition, three studies assessed COVID-19-related knowledge,  
49  
50 attitudes and practices in Nigeria, in Ghana/South Africa, and in the Republic of Chad (April-  
51  
52 May 2020, March-April 2020, and May-August 2020, respectively) using online surveys. All  
53  
54 three showed that study participants were very familiar with personal preventive measures  
55  
56 against COVID-19 and the disease's main symptoms<sup>14-16</sup>. However, the Nigerian study also  
57  
58  
59  
60

1  
2  
3 showed that approximately half of the surveyed individuals believed that only elderly people  
4 with comorbidities were likely to develop severe COVID-19, and 85% were unaware of the risk  
5 of being infected by asymptomatic individuals. Consistent with this finding and given that the  
6 participants in the Nigerian study were relatively young (69% aged between 21 and 30 years  
7 old), only 22.5% of surveyed individuals reported wearing a face mask when they went out <sup>14</sup>.  
8  
9 Another Nigerian study involving assessing perceived risks pointed out that despite good  
10 knowledge of COVID-19, implementing preventive behaviours would not be likely if the virus  
11 was not considered a risk (online survey in April 2020) <sup>17</sup>. More generally, the study conducted  
12 in the Republic of Chad showed significantly lower uptake of preventive practices in  
13 individuals with lower educational levels and precarious employment <sup>16</sup>. Furthermore, other  
14 published studies emphasized individuals' fear of serious COVID-19-related economic  
15 repercussions (notably people living in urban Ghanaian neighbourhoods with their own  
16 business in the informal economy <sup>18</sup> and farmers working in the Ethiopian vegetable sector <sup>19</sup>).  
17  
18  
19  
20  
21  
22  
23  
24  
25  
26  
27  
28  
29  
30  
31  
32

### 33 **Study Objectives**

34  
35  
36 The present ongoing study was designed in a setting marked by both uncertainty about the  
37 spread of COVID-19 in Sub-Saharan Africa and the scarce availability of individual data. Given  
38 the continued risk that the spread of COVID-19 will increase substantially in SSA, the memory  
39 of mass movements of people from big cities in March 2020 highlights the role that rural areas  
40 could play if such an event were to reoccur. This role could be major in a context where public  
41 authorities may not be in a position to systematically and substantially ease the economic shock  
42 induced by the pandemic<sup>20-22</sup>. While this role could evolve depending on rural populations'  
43 attitudes to such mass movements and their perceptions of the associated risks, we hypothesized  
44 that evaluating the evolution of individuals' perceived impact of COVID-19 pandemic could  
45 provide invaluable information about the potential pressure of the COVID-19 pandemic on  
46 these rural areas.  
47  
48  
49  
50  
51  
52  
53  
54  
55  
56  
57  
58  
59  
60



1  
2  
3 Accordingly, the present ongoing longitudinal study was designed to investigate the attitudes,  
4 risk perceptions and preventive behaviours of people living in a Senegalese rural area in terms  
5 of COVID-19, as well as their perceptions of the related economic impact. As rural areas often  
6 have limited access to the internet and given the increased risk of COVID-19 transmission  
7 during close contact interactions, the only available option was to conduct a phone-based  
8 survey.  
9

## 17 **Methods and analysis**

### 20 **Population**

21 This study includes adults (18 years old and over) living in all 30 villages of the rural Niakhar  
22 area covered by the Niakhar Health and Demographic Surveillance System (HDSS) <sup>23</sup>. The  
23 Niakhar HDSS, which is the oldest HDSS in Senegal (created in 1962) and one of the oldest in  
24 Western Africa, gathers regular data for the population covered, including demographic and  
25 health data. The Niakhar area itself is located 135 km East of Dakar and covers 203 km<sup>2</sup> with  
26 a population of 50 355 inhabitants (January 2018 census). More specifically, it is located in the  
27 ‘department’ (an administrative area) of Fatick (there are 45 departments in Senegal) which  
28 covers three different healthcare districts (including the Niakhar healthcare district). Most of  
29 the population (96.4%) living in this area belongs to the Serere ethnic group. The main  
30 economic activity is agriculture with food cultivation (millet) and a cash crop (peanuts), in  
31 addition to small-scale cattle breeding.  
32  
33  
34  
35  
36  
37  
38  
39  
40  
41  
42  
43  
44  
45  
46  
47

### 48 **Representativeness of Niakhar area with respect to COVID-19**

49 As the Niakhar area has been a site for research for several years, especially for infectology and  
50 epidemiology of infectious diseases, including malaria, meningitis and hepatitis <sup>23</sup>, the question  
51 arises as to how much the people living in the area are still truly representative of other  
52 Senegalese rural populations, especially regarding their knowledge of diseases that have long  
53 been studied there. However, given that COVID-19 is a new disease, we hypothesized that the  
54  
55  
56  
57  
58  
59  
60

1  
2  
3 Niakhar healthcare district would likely be comparable with other such districts in the country  
4  
5 with a similar population density, age distribution and poverty index <sup>24</sup>.  
6  
7

8  
9 To assess this hypothesis, we performed a multivariable Poisson regression on the numbers of  
10 confirmed COVID-19 cases at the district level (Senegalese Minister of Health:  
11 [http://www.sante.gouv.sn/Pr%2525C3%2525A9sentation/coronavirus-informations-](http://www.sante.gouv.sn/Pr%2525C3%2525A9sentation/coronavirus-informations-officielles-et-quotidiennes-du-msas)  
12 [officielles-et-quotidiennes-du-msas](http://www.sante.gouv.sn/Pr%2525C3%2525A9sentation/coronavirus-informations-officielles-et-quotidiennes-du-msas)). While standardized residuals represent variations in the  
13 data that cannot be explained by the model, residual plots enabled us to identify outliers (Figure  
14 1). As a result, the Niakhar healthcare district could not be considered an outlier in terms of the  
15 number of declared cases of COVID-19 (standardized residuals= -0.53). Furthermore, at the  
16 time the study began, the prevalence of COVID-19 in the department of Fatick was comparable  
17 with that in other Senegalese departments with similar population densities (Figure 2).  
18  
19  
20  
21  
22  
23  
24  
25  
26  
27  
28  
29

### 30 **Study design and procedure**

31 Study participants were randomly selected using a two-stage stratified sampling design. All 30  
32 villages in the Niakhar area were previously identified as rural (n=27) or semi-urban villages  
33 (n=3), depending on their infrastructure and equipment <sup>23</sup>. More specifically, unlike rural  
34 villages, the three semi-urbanised villages have health facilities, a weekly market, daily buses  
35 to the Senegal's capital Dakar, and several shops. The participating villages selected in the first  
36 stage (n=12) of the present study comprised the three semi-urban villages and a simple random  
37 sample of nine rural villages. In the second stage of sampling, 600 households from all the 1756  
38 households in these 12 participating villages were selected, again using simple random  
39 sampling.  
40  
41  
42  
43  
44  
45  
46  
47  
48  
49  
50  
51

52 This figure of 600 households was not arrived at from a calculation to determine the optimal  
53 number of households to be included, but was the result of a trade-off between the budgetary  
54 and logistic constraints of surveying up to three members in each household (i.e., a potential  
55 maximum of 1800 individuals) in three successive waves of data collection (the first wave  
56  
57  
58  
59  
60

1  
2  
3 started on July 27, 2020). Taking into account the design of previous surveys conducted in the  
4 same area <sup>25</sup>, we assumed a response rate of 90% for the first wave of data collection and an  
5 attrition rate of 15% over the data collection period, resulting in an estimated 500 surveyed  
6 households by the end of the third wave (scheduled for mid-2021). In the planned analyses,  
7 potential selection bias will be assessed and reduced by using sampling weights computed as  
8 reciprocals of the probabilities of selection of each household. Final weights will be calculated  
9 using an iterative process (ranking ratio estimation) involving sociodemographic data collected  
10 regularly by the Niakhar HDSS.  
11  
12  
13  
14  
15  
16  
17  
18  
19  
20  
21

### 22 **Longitudinal phone survey in multi-adult households**

23  
24 Data collection is expected to last at least until end-2021, unless the spread of COVID-19 at  
25 that time justifies extending data collection. The study started in March 2020 and it is funded  
26 until March 2022 (Inserm-ANRS, grant number ECTZ147735). Given that any application for  
27 funding for possible subsequent waves of data collection needs to occur well in advance, the  
28 decision about this issue has been postponed until mid-2021. For each wave, data are collected  
29 by surveying participants over their mobile phone. Participants' telephone numbers were  
30 recorded by community health workers (locally called *Badjanou Gokh*) prior to the first survey.  
31 Phone interviews are conducted using Computer assisted telephone interviews (CATI)  
32 software. To achieve higher response rates, 15 calls (1 initial and 14 callbacks) are planned  
33 during the several weeks of data collection, at different times of the day and on different days,  
34 before discarding a non-responsive telephone number. While 12 to 15 calls and 6 to 10 calls are  
35 generally recommended for landline and mobile CATI surveys respectively <sup>26</sup>, we opted for a  
36 maximum of 15 calls given the frequency of poor telephone connections in the area.  
37  
38  
39  
40  
41  
42  
43  
44  
45  
46  
47  
48  
49  
50  
51  
52  
53

54  
55 The COVID-19 sanitary context makes the implementation of the survey at each wave and the  
56 collection of data more complex than usual. Although this study protocol was the result of a  
57 close collaboration between Senegalese and French researchers, travelling restrictions  
58  
59  
60

1  
2  
3 prevented some of the latter from being physically present for the training of the CATI  
4 interviewers, for data collection preparatory meetings, for field meetings and for feedback  
5 sessions. Accordingly, the Senegalese research team is in charge of coordinating data collection  
6 and organizing CATI schedules, although regular internet-based meetings with the French  
7 research team ensure joint decision-making.  
8  
9

10  
11  
12  
13  
14  
15 The lack of the possibility to train interviewers up on CATI in Senegal because of the  
16 international travel restrictions meant that only experienced bilingual (French and Serere)  
17 interviewers already present in Senegal could administer the CATI surveys. As Serere is an oral  
18 only language, practice sessions to administer the questionnaires were performed by the  
19 interviewers in order to reach a consensus on the specific words to be used when performing  
20 the interviews in Serere. Consequently, the relevance and ease of understanding of each  
21 questionnaire item was assessed before the interviews took place in Serere. A total of seven  
22 interviewers collected data in the first wave. They were supervised by another senior  
23 interviewer whose specific role, in addition to supervision, was to share feedback on data  
24 collection with the two (Senegalese and French) research teams. In many aspects, the data  
25 collection process greatly benefits from long-term existing experience the interviewers have in  
26 administering research-based surveys.  
27  
28  
29  
30  
31  
32  
33  
34  
35  
36  
37  
38  
39  
40  
41  
42

### 43 **Data collection**

44  
45 The first data collection wave began on July 27, 2020 and interviewing lasted six weeks.  
46  
47 Furthermore, parallel data collection about local preventive strategies implemented in villages  
48 since July 2020 is about to be completed. Figure 3 summarizes the major steps of data collection  
49 and presents the study sample to be followed in our longitudinal design.  
50  
51  
52

53  
54  
55 For the first wave, phone interviews took place with three different persons in each participating  
56 household as follows: the head of the household, his wife (for those who had more than one  
57 wife, the wife responsible for managing the household), and a relative from a city who had  
58  
59  
60

1  
2  
3 decided to come and live momentarily in the rural household because of the risk of COVID-19  
4 and the fear of associated economic consequences. Specifically, heads of households had to  
5  
6 and the fear of associated economic consequences. Specifically, heads of households had to  
7  
8 decide which wife and which temporary visiting relative would be surveyed, and to provide  
9  
10 their names and mobile phone numbers during the first phone interview. When interviewing  
11  
12 heads of households, their designated wives and visiting relatives on their mobile phones, the  
13  
14 interviewers first presented the study and informed them about its longitudinal design, obtained  
15  
16 their consent to participate, and then interviewed them. As a way of thanking households for  
17  
18 their participation, the community health workers provided them with a personal protection kit  
19  
20 including hydroalcoholic gel and a face mask at the end of the first wave of data collection.  
21  
22

23  
24 As regards relatives temporarily living in the household, those individuals interviewed in the  
25  
26 first wave of data collection will be surveyed in successive waves. New visiting relatives  
27  
28 identified between two different waves of data collection will also be included in the study  
29  
30 design by interviewing them in all data collection waves subsequent to their inclusion. As we  
31  
32 wanted to ensure that our study design and protocol were feasible given current national and  
33  
34 international restrictive measures due to COVID-19, we chose to wait until the first wave of  
35  
36 data collection neared completion before presenting the study design here.  
37  
38  
39

### 40 41 **Questionnaires**

42  
43 Three questionnaires were constructed (one each) for the heads of the selected households, their  
44  
45 designated wives in charge of managing the household, and their designated relative  
46  
47 temporarily living with them (Supplementary file 1, 2 and 3, respectively). In addition to  
48  
49 sharing identical sets of questions on several topics (risks perceptions, attitudes to curfew,  
50  
51 attitudes to vaccines, beliefs about COVID-19 infection), the three separate survey  
52  
53 questionnaires also contain other questions on other topics (economic impact, local preventive  
54  
55 strategies). These questions differ between questionnaires. For example, with regard to local  
56  
57 preventive strategies, household heads are asked about the local COVID-19 prevention  
58  
59  
60

1  
2  
3 strategies implemented in their village, while their wives are asked about anti-COVID-19  
4 private prevention measures in the household, and newcomers about personal preventive  
5 measures in the household and possibly asked to implement when they first arrived (e.g.,  
6 quarantine). While this study involves collecting data at different moments in time, the same  
7 topics and associated sets of questions presented below will be used throughout the study in  
8 order to evaluate evolutions.  
9  
10  
11  
12  
13  
14  
15

## 16 17 18 **Measures**

### 19 20 *Sociodemographic characteristics*

21  
22 As the study's framework provides for collected data to be matched with existing data in the  
23 Niakhar HDSS <sup>23</sup> database, only individual sociodemographic data needs to be collected during  
24 the telephone interviews, including marital status, educational level, number of children, the  
25 latter's ages and type of schooling (public or religious school), as well as the respondent's level  
26 of access to the internet. With regard to employment at the time of the survey, participants are  
27 invited to answer open-ended questions whose responses are consequently recoded into nine  
28 different standard categories (Farmers, Craftsmen, Workers, Employees, Intermediate  
29 professions, Managers and higher intellectual professions, Students, Pensioners, Not engaged  
30 in active employment). While these categories are consistent with those adopted in some  
31 Northern countries, they will be grouped into broader categories if necessary (such as  
32 Employed, Seeking employment, and Other, inactive (Students, Pensioners)), and then  
33 considered in relation to educational level <sup>27</sup>.  
34  
35  
36  
37  
38  
39  
40  
41  
42  
43  
44  
45  
46  
47  
48  
49  
50

### 51 *Risk perceptions*

52  
53 Collecting data on the perceived risks of COVID-19 is of crucial importance in understanding  
54 individuals' related attitudes and behaviours. In line with previous survey studies, the  
55 assessment of risk perceptions in the present study involves collecting information on  
56 introspective judgements <sup>28,29</sup>. After asking surveyed individuals whether they have heard about  
57  
58  
59  
60

1  
2  
3 COVID-19 pandemic before being surveyed, an assessment is performed using a scale from 0  
4 (not at all) to 10 (extremely) to measure how worried they are about getting the disease, and  
5 how contagious and severe they perceive it to be<sup>30</sup>. In addition, perceived mortality of COVID-  
6  
7  
8  
9  
10  
11  
12  
13  
14  
15  
16  
17  
18  
19  
20  
21  
22  
23  
24  
25  
26  
27  
28  
29  
30  
31  
32  
33  
34  
35  
36  
37  
38  
39  
40  
41  
42  
43  
44  
45  
46  
47  
48  
49  
50  
51  
52  
53  
54  
55  
56  
57  
58  
59  
60

COVID-19 is assessed based on a question about what the participant believes will be the number of deaths out of every 100 people with COVID-19. To provide greater insight into participants' COVID-19 risk perceptions, all the questions mentioned above are asked again for malaria, a well-known and common viral infection in Sub-Saharan African countries which also starts with flu-like symptoms.

Finally, respondents are invited to self-assess their perceived absolute and relative risks of COVID-19 infection<sup>31</sup> by ranking their level of self-perceived risk (four-point Likert-type scale from "very low" (=1) to "very high" (=4)) and by positioning their own perceived risks with respect to others of the same age and gender (five-point Likert-type scale from "much lower" (=1) to "much higher" (=5)). The questionnaires also include items measuring the extent of the respondent's fear that the visiting relative is unknowingly infected with COVID-19 and asymptomatic.

Other questionnaire items assessing risk perceptions include asking heads of households (/their surveyed wife) to adopt their spouse's perspective and to report the extent to which they believe their spouse is worried about COVID-19. Similarly, both individuals are asked to report the extent to which they believe their spouse perceives that she (/he) is at risk of COVID-19 and how she (/he) places this level of perceived risk in relation to that of other wives (/husbands) of the same age and gender. Accounting for the potential impact of respondents' current health state on their perceived risks, respondents are asked how they feel in terms of their state of health at the time of the survey (eleven-point Likert-type scale from "very poor" (=0) to "very well" (=10)).

### *Attitudes*

Given the unprecedented context of COVID-19 pandemic, assessing individual attitudes to the disease necessitates using ad-hoc questions. Considering the restrictive measures adopted in Senegal from March 2020 onward, attitudes to curfews in general, whether implemented in rural or urban areas are assessed in the present study. With regard to health issues, surveyed individuals are invited to report how worried they are about buying counterfeit drugs, their attitudes to vaccination in general and to (unavailable at the time of the first wave of data collection) the anti-COVID-19 vaccine. In addition, participants are asked whether they would consider having anti-COVID-19 vaccine for themselves and for their children if it were free of charge (four-point Likert-type scale from “certainly yes” (=1) to “definitely not” (=4) in all cases). Assessing knowledge of COVID-19 variants and their perceived risks in comparison with the risks of the original strain is planned for subsequent waves of data collection. Finally, individuals’ agreement (agree/disagree) is assessed regarding statements circulating on the internet and reflecting rumour-related fake information on COVID-19 transmission and cure.

### *Preventive behaviours*

It has been recently suggested that locally implemented COVID-19 preventive strategies could potentially explain, at least in part, the as yet slow spread of COVID-19 in SSA<sup>89</sup>. The present study collected data which could shed some more light on this issue. In our ongoing longitudinal study, preventive behaviours cover individual protection measures by the study’s participants and collective prevention strategies implemented by administrative, religious or medical authorities in the area covered by the survey. With regard to the former, the study’s questionnaires include items measuring how much the COVID-19 pandemic has led to changes in everyday life in the participating households, in changes in journeys to and from the local market or the closest city, and in changes in the way relatives from cities are welcomed, especially in terms of possible quarantine upon their arrival.



1  
2  
3 In order to compare participant recall with objective data on locally implemented collective  
4 prevention strategies, specific data has been gathered from the outset of the study to document  
5 the dates, duration and nature of all collective actions implemented in the study's 12 study  
6 villages. To do this, the interviewers who conduct the phone surveys have also been in charge  
7 of conducting face-to-face interviews in each village, with the village chief, the healthpost  
8 nurses, the community health workers (*Badjanou Gokh*), and representatives from both the  
9 town hall and the subprefecture, local associations involved in the fight against Covid-19 spread  
10 (e.g., former military personnel, student and youth associations), and non-governmental  
11 organizations (e.g., local branches of the Red Cross). At the regional level, interviews have also  
12 been conducted on a regular basis with representatives of the healthcare districts. The  
13 preventive measures identified mainly consist in the distribution of leaflets, antiseptic soap and  
14 face masks, as well as the installation of hand washing facilities in schools, markets, village  
15 entrances, households, churches and mosques. These data will continue to be collected over the  
16 whole data collection period.

### 35 ***Economic impact on everyday life***

36  
37 One primary concern about the spread of COVID-19 in Sub-Saharan African countries is a  
38 possible resulting economic shock<sup>12 20-22</sup>. Supposing that urban areas would most likely be the  
39 first to be highly impacted by the COVID-19 pandemic, rural areas could indeed be in position  
40 to soften, at least in part, the economic consequences of COVID-19 pandemic. In this respect,  
41 our ongoing study assesses the pandemic's impact with questions about the main  
42 sociodemographic characteristics of relatives from cities currently living in the household  
43 because of COVID-19, and questions about the perceived burden on the rural household (e.g.,  
44 having to provide food for more people) as well as the benefits (e.g., larger labour force for  
45 agricultural work) associated with their arrival in the household. In addition, the study examines  
46 possible assistance from administrative authorities or neighbours locally implemented, as well  
47  
48  
49  
50  
51  
52  
53  
54  
55  
56  
57  
58  
59  
60

1  
2  
3 as possible assistance given to neighbours because of the COVID-19 pandemic. Furthermore,  
4 possible COVID-19 pandemic-related financial difficulties are explored concerning everyday  
5 purchases and sales of crops in local markets. Finally, relatives from cities temporarily living  
6 in the household because of their fear of COVID-19 and induced economic losses are asked to  
7 self-assess the extent to which the pandemic has impacted their own life as well as everyday  
8 life in the household. In terms of financial support provided to the household, heads of  
9 households are asked about those relatives currently living with them and whether these  
10 relatives provided support before they arrived to temporarily stay. Similarly, they are asked  
11 about the extent to which relatives who left the household to go back to cities currently  
12 financially support the household.  
13  
14  
15  
16  
17  
18  
19  
20  
21  
22  
23  
24  
25  
26

### 27 **Main relationships to be tested**

28  
29 In this unprecedented COVID-19 pandemic sanitary context, while the present study serves a  
30 descriptive purpose, its primary aim is to assess various relationships. In line with the economic-  
31 based approach recently published in the French context of COVID-19 <sup>32</sup>, our study should  
32 enable the calibration of individual risk perceptions to be assessed based on the consistency  
33 between perceived mortality of COVID-19 and epidemiological information available at the  
34 time of data collection. Furthermore, a greater understanding of calibration should be gained by  
35 the fact that we are taking perceived worry, severity and contagiousness of COVID-19 into  
36 account, and conducting comparisons with introspective judgements relating to malaria. In  
37 addition, taking participants' socio-demographic characteristics into account should provide  
38 greater insight into the determinants of risk perceptions. Following on from Attema et al.  
39 (2021), we will examine the calibration, heterogeneity and determinants of risk perceptions,  
40 accounting for the temporal dynamics of the COVID-19 pandemic in Senegal. Finally, by  
41 focusing on the extent to which interviewed persons (husbands, wives) assess their spouse's  
42 perceived risk of getting COVID-19, this study could also help to estimate the potential impact  
43  
44  
45  
46  
47  
48  
49  
50  
51  
52  
53  
54  
55  
56  
57  
58  
59  
60

1  
2  
3 of discrepancies in couples' risk perceptions regarding the extent of preventive measures  
4 actually adopted in households.  
5  
6

7  
8 As regards the COVID-19 preventive strategies implemented at the village and household  
9 levels, it is possible that experience gained from the Ebola and HIV/AIDS pandemics has  
10 helped people manage the risk of COVID-19<sup>10</sup>. In the present study, we hypothesize that  
11 accurate recall of local prevention strategies currently in place is higher in villages with more  
12 prevention strategies implemented. We also hypothesize that implementing preventive  
13 strategies at the village level might have a positive impact on adopting strategies at the  
14 household level. Exploring the relationship between collective and individual preventive  
15 behaviours will therefore enable us to evaluate the impact of locally implemented preventive  
16 measures on slowing the spread of COVID-19. Using the prospectively collected data will also  
17 allow us to analyse the dynamics of this relationship over time with respect to attitudes and risk  
18 perceptions.  
19  
20  
21  
22  
23  
24  
25  
26  
27  
28  
29  
30  
31  
32

33  
34 With regard to the economic impact of COVID-19 pandemic on everyday lives, adopting a  
35 descriptive approach will be useful given the scarce data available. In addition, accounting for  
36 the sociodemographic characteristics of both heads of households and relatives who temporarily  
37 left big cities will allow us to assess the size of any possible gradient in the economic pressure  
38 of the COVID-19 pandemic on rural areas and its evolution over time. In the unprecedented  
39 context of the COVID-19 pandemic, the generalizability of the study's results will however  
40 remain to be explored.  
41  
42  
43  
44  
45  
46  
47  
48  
49  
50

### 51 **Patient and public involvement**

52 No patient involved. We plan to disseminate results to the study participants and all the villagers  
53 interested in the study in participating villages at the end of the study (currently March 2022).  
54  
55 If restrictive measures against the gathering of people are no longer in place, dissemination is  
56  
57  
58  
59  
60

1  
2  
3 planned to be held in the open air and in the presence of each village chief, healthpost  
4 representatives, and the *Badjanou Gokh*. In addition, restitution workshops are planned to be  
5 organised at the sanitary district and regional level and to involve administrative and sanitary  
6 authorities. Lastly, the main findings from the study are planned to be compiled in a document  
7 distributed at sub-national and national levels to the administrative and sanitary authorities.  
8  
9  
10  
11  
12  
13  
14

## 15 **Ethics and dissemination**

16  
17  
18 COVID-19 is currently (as of February 2021) spreading relatively slowly in SSA although a  
19 sharp increase in its spread cannot be excluded. Given the current context, the present ongoing  
20 longitudinal study protocol aims to provide data on the attitudinal, behavioural and economic  
21 consequences of the disease in a rural area in Senegal at a time when very few data are available.  
22 Since rural areas may likely be seen as safe refuges, our study collects data from heads of rural  
23 households, their wives (in charge of managing the household) and relatives who leave cities  
24 to temporarily live in these households, specifically because of the COVID-19 pandemic. The  
25 study protocol was approved by the Senegalese National Ethical Committee for Research in  
26 Health (131/MSAS/CNERS/Sec) and received authorisation from the Senegalese Ministry of  
27 Health (619/MSAS/DPRS/DR) and the French Commission on Information Technology and  
28 Liberties (CNIL 2220771).  
29  
30  
31  
32  
33  
34  
35  
36  
37  
38  
39  
40  
41  
42  
43

44 To conclude, this ongoing study benefits greatly from close previously established research  
45 relationships between the researchers and the interviewers involved. Now that data collection  
46 for the first wave is nearing completion, and that data collection has been proven to be feasible  
47 despite COVID-19 restrictions, we believe that the primary benefit of our longitudinal design  
48 will be to provide data which could help to analyse evolutions in risk perceptions, attitudes, and  
49 preventive behaviours of the disease, as well as its economic impact on everyday lives. In the  
50  
51  
52  
53  
54  
55  
56  
57  
58  
59  
60

unprecedented context of the COVID-19 pandemic, the generalizability of the study's results needs to be explored.

## Acknowledgements

We would like to thank the interviewers involved in the study, i.e. Modou DIOME, Cheikh DIOUF, Ndèye Selbé DIOUF, Moussa GUEYE, Fadiène NDIAYE, Mayé NDOUR, Coumba Sandiane SENE, Natalie TINE. Finally, our thanks to Jude Sweeney (Milan, Italy) for the English revision and editing of our manuscript.

## Group Information

Members of the CO3ELSER Study Group are Elhadji Ba ; Assane Ndiaye ; Cheikh Sokhna (UMR VITROME, IRD-Université Aix Marseille, AP-HM, SSA, IHU-Méditerranée Infection, Marseille, France, and Campus International, IRD-UCAD de l'IRD, Dakar, Sénégal) Cyril Berenger, Gwenaëlle Maradan (ORS PACA, Southeastern Health Regional Observatory, 13006, Marseille, France), Valerie Seror, Sebastien Cortaredona, Patrick Peretti-Watel (Aix Marseille Univ, IRD, AP-HM, SSA, VITROME, Marseille, France, IHU-Méditerranée Infection, Marseille, France), Olivier L'Haridon (Faculty of Economics, University of Rennes 1, Univ Rennes, CNRS, CREM UMR 6211, Rennes, France), Jocelyn Raude (EHESP School of Public Health, Rennes, France).

**Figure 1. Multivariable Poisson regression at the district level and residual dependence plot (n=79).**

Note: Outcome: number of confirmed COVID-19 cases at the healthcare district level (data accessed on November 26, 2020: <http://www.sante.gouv.sn/Pr%2525C3%2525A9sentation/coronavirus-informations-officielles-et-quotidiennes-du-msas>). Offset: total population of the healthcare district. Covariates: Urbanization rates (%), Poverty index (%), and Rates of people aged 50 and older (%).

## Figure 2. Number of COVID-19 confirmed cases at the department level (n=45)

Source: <http://www.sante.gouv.sn/Pr%2525C3%2525A9sentation/coronavirus-informations-officielles-et-quotidiennes-du-msas>; data accessed on November 26, 2020.

Note: The administrative 'department' of Fatick covers several healthcare districts, including the Niakhar healthcare district).

## Figure 3. Study flow diagram

Note: Mobile phone numbers provided by community health workers (Badjanou Gokh). 500 surveyed households were expected to participate by the end of the third wave of data collection (scheduled for mid-2021), given a 90% response rate for the first wave and a 15% attrition rate at each subsequent wave.

## References

1. Martinez-Alvarez M, Jarde A, Usuf E, et al. COVID-19 pandemic in west Africa. *Lancet Glob Health* 2020;8(5):e631-e32. doi: 10.1016/S2214-109X(20)30123-6 [published Online First: 2020/04/05]
2. Sun H, Dickens BL, Cook AR, et al. Importations of COVID-19 into African countries and risk of onward spread. *BMC Infect Dis* 2020;20(1):598. doi: 10.1186/s12879-020-05323-w [published Online First: 2020/08/15]
3. Cabore JW, Karamagi HC, Kipruto H, et al. The potential effects of widespread community transmission of SARS-CoV-2 infection in the World Health Organization African Region: a predictive model. *BMJ Glob Health* 2020;5(5) doi: 10.1136/bmjgh-2020-002647 [published Online First: 2020/05/27]
4. Diop BZ, Ngom M, Pougue Biyong C, et al. The relatively young and rural population may limit the spread and severity of COVID-19 in Africa: a modelling study. *BMJ Glob Health* 2020;5(5) doi: 10.1136/bmjgh-2020-002699 [published Online First: 2020/05/27]
5. Ghisolfi S, Almas I, Sandefur JC, et al. Predicted COVID-19 fatality rates based on age, sex, comorbidities and health system capacity. *BMJ Glob Health* 2020;5(9) doi: 10.1136/bmjgh-2020-003094 [published Online First: 2020/09/12]
6. Nguimkeu P, Tadadjeu S. Why is the number of COVID-19 cases lower than expected in Sub-Saharan Africa? A cross-sectional analysis of the role of demographic and

- 1  
2  
3 geographic factors. *World Dev* 2021;138:105251. doi:  
4 10.1016/j.worlddev.2020.105251 [published Online First: 2020/10/28]  
5  
6 7. Netea MG, Dominguez-Andres J, Barreiro LB, et al. Defining trained immunity and its role  
7 in health and disease. *Nat Rev Immunol* 2020;20(6):375-88. doi: 10.1038/s41577-020-  
8 0285-6 [published Online First: 2020/03/07]  
9  
10 8. Colebunders R, Siewe Fodjo JN, Vanham G, et al. A call for strengthened evidence on  
11 targeted, non-pharmaceutical interventions against COVID-19 for the protection of  
12 vulnerable individuals in sub-Saharan Africa. *Int J Infect Dis* 2020;99:482-84. doi:  
13 10.1016/j.ijid.2020.08.060 [published Online First: 2020/08/31]  
14  
15 9. Evans MV, Garchitorea A, Rakotonanahary RJL, et al. Reconciling model predictions with  
16 low reported cases of COVID-19 in Sub-Saharan Africa: insights from Madagascar.  
17 *Glob Health Action* 2020;13(1):1816044. doi: 10.1080/16549716.2020.1816044  
18 [published Online First: 2020/10/06]  
19  
20 10. Payne C. COVID-19 in Africa. *Nat Hum Behav* 2020;4(5):436-37. doi: 10.1038/s41562-  
21 020-0870-5 [published Online First: 2020/04/05]  
22  
23 11. Paintsil E. COVID-19 threatens health systems in sub-Saharan Africa: the eye of the  
24 crocodile. *J Clin Invest* 2020;130(6):2741-44. doi: 10.1172/JCI138493 [published  
25 Online First: 2020/04/01]  
26  
27 12. Ataguba JE. COVID-19 Pandemic, a War to be Won: Understanding its Economic  
28 Implications for Africa. *Appl Health Econ Health Policy* 2020;18(3):325-28. doi:  
29 10.1007/s40258-020-00580-x [published Online First: 2020/04/07]  
30  
31 13. Osuagwu UL, Miner CA, Bhattarai D, et al. Misinformation About COVID-19 in Sub-  
32 Saharan Africa: Evidence from a Cross-Sectional Survey. *Health Secur* 2021;19(1):44-  
33 56. doi: 10.1089/HS.2020.0202 [published Online First: 2021/02/20]  
34  
35 14. Adesegun OA, Binuyo T, Adeyemi O, et al. The COVID-19 Crisis in Sub-Saharan Africa:  
36 Knowledge, Attitudes, and Practices of the Nigerian Public. *Am J Trop Med Hyg*  
37 2020;103(5):1997-2004. doi: 10.4269/ajtmh.20-0461 [published Online First:  
38 2020/09/26]  
39  
40 15. Reddy SP, Sewpaul R, Mabaso M, et al. South Africans' understanding of and response to  
41 the COVID-19 outbreak: An online survey. *S Afr Med J* 2020;110(9):894-902.  
42 [published Online First: 2020/09/04]  
43  
44 16. Takoudjou Dzomo GR, Bernales M, Lopez R, et al. Knowledge, Attitudes and Practices  
45 Regarding COVID19 in N'Djamena, Chad. *J Community Health* 2021;46(2):259-66.  
46 doi: 10.1007/s10900-021-00963-8 [published Online First: 2021/01/24]  
47  
48  
49  
50  
51  
52  
53  
54  
55  
56  
57  
58  
59  
60

- 1  
2  
3 17. Iorfa SK, Ottu IFA, Oguntayo R, et al. COVID-19 Knowledge, Risk Perception, and  
4 Precautionary Behavior Among Nigerians: A Moderated Mediation Approach. *Front*  
5 *Psychol* 2020;11:566773. doi: 10.3389/fpsyg.2020.566773 [published Online First:  
6 2020/12/18]  
7  
8  
9
- 10 18. Durizzo K, Asiedu E, Van der Merwe A, et al. Managing the COVID-19 pandemic in poor  
11 urban neighborhoods: The case of Accra and Johannesburg. *World Dev*  
12 2021;137:105175. doi: 10.1016/j.worlddev.2020.105175 [published Online First:  
13 2020/09/10]  
14  
15  
16
- 17 19. Minten B, Mohammed B, Tamru S. Emerging Medium-Scale Tenant Farming, Gig  
18 Economies, and the COVID-19 Disruption: The Case of Commercial Vegetable  
19 Clusters in Ethiopia. *Eur J Dev Res* 2020:1-28. doi: 10.1057/s41287-020-00315-7  
20 [published Online First: 2020/10/27]  
21  
22  
23
- 24 20. Amewu S, Asante S, Pauw K, et al. The Economic Costs of COVID-19 in Sub-Saharan  
25 Africa: Insights from a Simulation Exercise for Ghana. *Eur J Dev Res* 2020:1-26. doi:  
26 10.1057/s41287-020-00332-6 [published Online First: 2020/11/05]  
27  
28
- 29 21. Haider N, Osman AY, Gadzekpo A, et al. Lockdown measures in response to COVID-19  
30 in nine sub-Saharan African countries. *BMJ Glob Health* 2020;5(10) doi:  
31 10.1136/bmjgh-2020-003319 [published Online First: 2020/10/09]  
32  
33
- 34 22. Renzaho AMN. The Need for the Right Socio-Economic and Cultural Fit in the COVID-19  
35 Response in Sub-Saharan Africa: Examining Demographic, Economic Political, Health,  
36 and Socio-Cultural Differentials in COVID-19 Morbidity and Mortality. *Int J Environ*  
37 *Res Public Health* 2020;17(10) doi: 10.3390/ijerph17103445 [published Online First:  
38 2020/05/21]  
39  
40  
41  
42
- 43 23. Delaunay V, Douillot L, Diallo A, et al. Profile: the Niakhar Health and Demographic  
44 Surveillance System. *Int J Epidemiol* 2013;42(4):1002-11. doi: 10.1093/ije/dyt100  
45 [published Online First: 2013/09/26]  
46  
47
- 48 24. Khaliloulah I. Accessibilité géographique des structures sanitaires au Sénégal. *Annales des*  
49 *sciences de la santé* 2017;1(10):10-25.  
50
- 51 25. Coste M, De Seze M, Diallo A, et al. Burden and impacts of chronic hepatitis B infection  
52 in rural Senegal: study protocol of a cross-sectional survey in the area of Niakhar  
53 (AmBASS ANRS 12356). *BMJ Open* 2019;9(7):e030211. doi: 10.1136/bmjopen-2019-  
54 030211 [published Online First: 2019/07/20]  
55  
56  
57  
58  
59  
60



- 1  
2  
3 26. Vicente P, Marques C, Reis E. Effects of call patterns on the likelihood of contact and of  
4 interview in mobile CATI surveys. Retrieved from <https://surveyinsightsorg/?p=9044>  
5 2017  
6  
7  
8 27. Fiorentino M, Eubanks A, Coulaud PJ, et al. Homonegativity, sexual violence and condom  
9 use with women in men who have sex with men and women in West Africa. *AIDS*  
10 2021;35(4):681-87. doi: 10.1097/QAD.0000000000002782 [published Online First:  
11 2020/12/12]  
12  
13 28. Carman KG, Kooreman P. Probability perceptions and preventive health care. *J Risk*  
14 *Uncertain* 2014;49(1):43-71.  
15  
16 29. Viscusi WK. Do smokers underestimate risks? *J Polit Econ* 1990;98(6):1253-56.  
17  
18 30. Ibuka Y, Chapman GB, Meyers LA, et al. The dynamics of risk perceptions and  
19 precautionary behavior in response to 2009 (H1N1) pandemic influenza. *BMC Infect*  
20 *Dis* 2010;10:296. doi: 10.1186/1471-2334-10-296 [published Online First: 2010/10/16]  
21  
22 31. Malenka DJ, Baron JA, Johansen S, et al. The framing effect of relative and absolute risk.  
23 *J Gen Intern Med* 1993;8(10):543-8. doi: 10.1007/BF02599636 [published Online First:  
24 1993/10/01]  
25  
26 32. Attema AE, L'Haridon O, Raude J, et al. Beliefs and Risk Perceptions About COVID-19:  
27 Evidence From Two Successive French Representative Surveys During Lockdown.  
28 *Front Psychol* 2021;12:619145. doi: 10.3389/fpsyg.2021.619145 [published Online  
29 First: 2021/02/19]  
30  
31  
32  
33  
34  
35  
36  
37  
38  
39  
40  
41  
42  
43  
44  
45  
46  
47  
48  
49  
50  
51  
52  
53  
54  
55  
56  
57  
58  
59  
60

1  
2  
3 **Authors' contributions:** VS and CS conceptualised the study and obtained funding. GM, E-  
4 HB, OLH and SC contributed to the development of the study design. GM, E-HB, and CB were  
5 responsible for the development of the data collection platform, field testing of the study  
6 logistics, and participant recruitment. VS, CS, GM, OLH and SC drafted the first version of the  
7 manuscript. All authors read, edited and approved the final version.  
8  
9

10  
11  
12  
13  
14  
15 **Funding statement:** This work is supported by the French National Institute for Health and  
16 Medical Research-French National Agency for Aids and Viral Hepatitis Research (Inserm-  
17 ANRS, grant number ECTZ147735).  
18  
19

20  
21  
22  
23 **Competing interests statement.** No competing interests to declare.  
24

25  
26 **Word Count:** 4701 words.  
27  
28  
29  
30  
31  
32  
33  
34  
35  
36  
37  
38  
39  
40  
41  
42  
43  
44  
45  
46  
47  
48  
49  
50  
51  
52  
53  
54  
55  
56  
57  
58  
59  
60

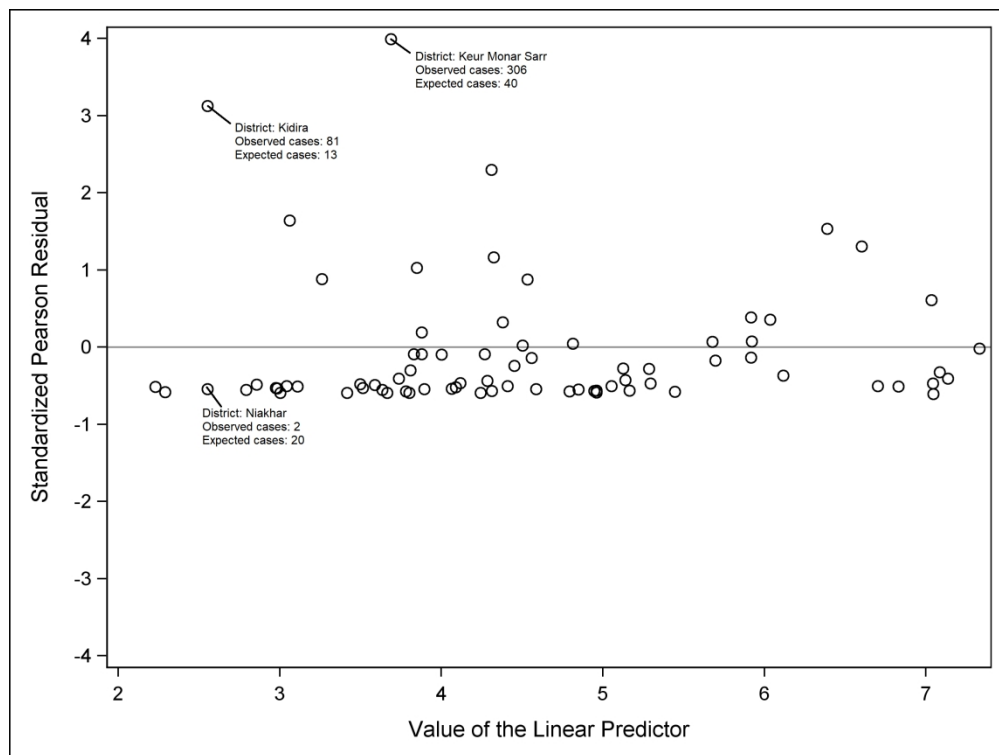

Figure 1. Multivariable Poisson regression at the district level and residual dependence plot (n=79).

225x169mm (300 x 300 DPI)

1  
2  
3  
4  
5  
6  
7  
8  
9  
10  
11  
12  
13  
14  
15  
16  
17  
18  
19  
20  
21  
22  
23  
24  
25  
26  
27  
28  
29  
30  
31  
32  
33  
34  
35  
36  
37  
38  
39  
40  
41  
42  
43  
44  
45  
46  
47  
48  
49  
50  
51  
52  
53  
54  
55  
56  
57  
58  
59  
60

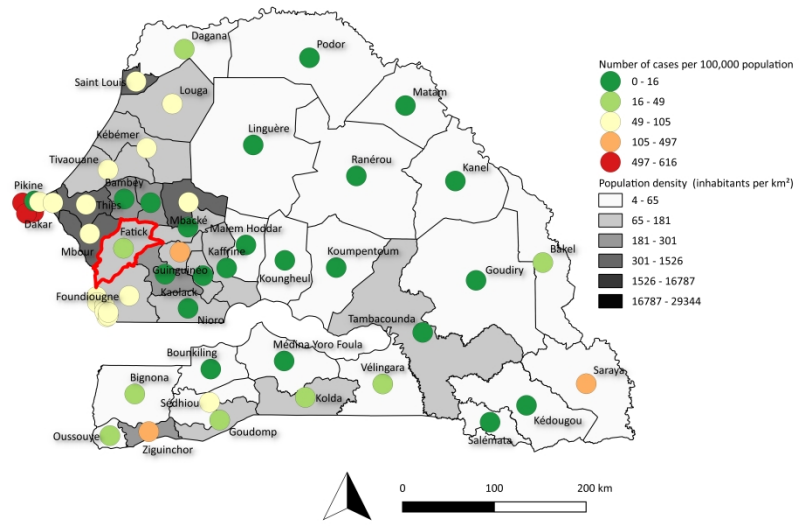

Figure 2. Number of COVID-19 confirmed cases at the department level (n=45)

593x419mm (300 x 300 DPI)

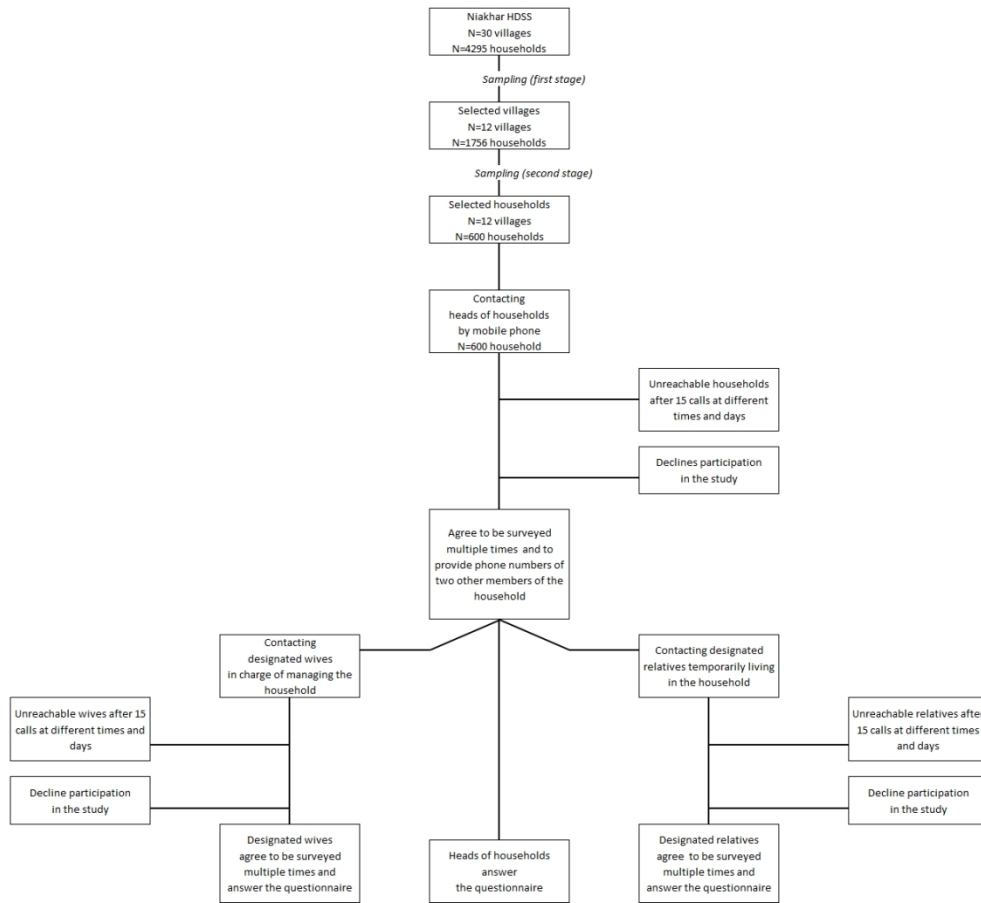

Figure 3. Study flow diagram

107x98mm (300 x 300 DPI)

## Chef de famille : A PROPOS DU CORONAVIRUS...

### C1. Avez-vous déjà entendu parler du Coronavirus ?

1. Oui                       2. Non → **Aller à la question IC1**

### C2. Quand avez-vous appris qu'il y a une épidémie de Coronavirus ?

1. Quand l'épidémie était en Chine ou en Asie  
 2. Quand l'épidémie est arrivée en Europe  
 3. Quand l'épidémie est arrivée en Afrique  
 4. Quand l'épidémie est arrivée au Sénégal  
 5. Autre : \_\_\_\_\_

### C3. Comment avez-vous appris qu'il y a une épidémie de Coronavirus ?

1. Par la radio ou la télévision  
 2. Par Internet  
 3. Par des membres de la famille en ville  
 4. Par des voisins  
 5. Par le chef du village  
 6. Par le Centre de santé  
 7. Par votre représentant religieux (l'imam ou le curé)  
 8. Par les relais communautaires  
 9. Par les Badienou Gokh  
 10. Autre : \_\_\_\_\_

### C4. Avez-vous accès à Internet ?

1. Très facilement     2. Plutôt facilement     3. Plutôt difficilement     4. Très difficilement

### C5. Si C4=1 à 3 : Est-ce que vous allez sur Internet pour avoir des informations sur le Coronavirus ?

1. Oui, tous les jours  
 2. Oui, quelques fois par semaine  
 3. Oui, de temps en temps  
 4. Non, jamais

### C6. Etes-vous inquiet qu'un membre de votre cuisine attrape le coronavirus ?

1. Très inquiet     2. Plutôt inquiet     3. Plutôt pas inquiet     4. Pas inquiet du tout

### C7. Avez-vous changé vos habitudes pour éviter que le Coronavirus arrive dans votre cuisine ?

1. Oui                       2. Non

### C8. Est-ce que le Chef du village a pris des mesures pour éviter que les habitants attrapent le Coronavirus ?

1. Oui                       2. Non

↳ Lesquelles ? \_\_\_\_\_

### C9. Est-ce que le Centre de santé a pris des mesures pour éviter que les habitants attrapent le Coronavirus ?

1. Oui                       2. Non

↳ Lesquelles ? \_\_\_\_\_

**C10. Pour vous-même, pensez-vous que votre risque d'attraper le Coronavirus est ?**

1. Très faible
2. Plutôt faible
3. Plutôt élevé
4. Très élevé

**C11. Par rapport aux hommes de votre âge, est-ce que vous pensez que votre risque d'attraper le Coronavirus est ?**

1. Beaucoup moins importants que pour les autres hommes de mon âge
2. Moins importants que pour les autres hommes de mon âge
3. Ni plus ni moins importants que pour les autres hommes de mon âge
4. Plus importants que pour les autres hommes de mon âge
5. Beaucoup plus importants que pour les autres hommes de mon âge

**C13A. Si vous ou un membre de votre famille attrapait le Coronavirus, où iriez-vous pour les soins ?**

1. Poste de Santé     2. Guérisseur     3. Autre ; Préciser \_\_\_\_\_

**C13B. Pensez-vous à un médicament pour soigner le coronavirus ?**

1. Oui     2. Non

**C13C. Si oui, lequel ?** \_\_\_\_\_.

**C14. En général, craignez-vous d'acheter de faux médicaments ?**

1. Oui, tout à fait     2. Oui, plutôt     3. Non, plutôt pas     4. Non, pas du tout

**C15. En général, êtes-vous réticent à l'idée de vous faire vacciner ?**

1. Oui, tout à fait     2. Oui, plutôt     3. Non, plutôt pas     4. Non, pas du tout

**C16. Si un vaccin contre le Coronavirus était disponible et gratuit, est-ce que vous voudriez vous faire vacciner ?**

1. Oui, certainement     2. Oui, probablement     3. Non, probablement pas     4. Non, certainement pas

**Si C16=3 ou 4 : C16A. Pour quelles raisons ne vous feriez-vous pas vacciner ?**

1. Vous êtes contre la vaccination en général
2. Vous pensez qu'un vaccin élaboré dans l'urgence est trop dangereux
3. Vous pensez que c'est inutile parce que le COVID-19 est peu dangereux
4. Autre : \_\_\_\_\_

**C17. Connaissez-vous des personnes dans votre famille, ou parmi vos amis ou connaissances, qui sont, ou qui ont été malades du Coronavirus ?**

1. Oui, dans la famille     2. Oui, parmi les amis ou connaissances
3. Oui, à la fois dans la famille et parmi les amis ou connaissances     3. Non

**C18. Si C17=1,3 : Est-ce qu'il s'agit de personnes qui vivent actuellement avec vous ?**

1. Oui     2. Non

1 **C19. Selon vous, est-ce que le couvre-feux dans le bassin de Niakhar est nécessaire pour limiter**  
2 **l'épidémie de Coronavirus ?**

- 3  1. Oui, tout à fait  2. Oui, plutôt  3. Non, plutôt pas  4. Non, pas du tout

5 **C20. Selon vous, est-ce que le couvre-feux dans les villes permet de limiter l'épidémie de Coronavirus ?**

- 6  1. Oui, tout à fait  2. Oui, plutôt  3. Non, plutôt pas  4. Non, pas du tout

8 **C21. Selon vous, qu'est-ce qui est préférable ?**

- 9  1. Imposer le couvre-feu seulement dans les zones où il y a des malades du Coronavirus  
10  2. Imposer le couvre-feu dans tout le Sénégal pour que tous les citoyens vivent la même chose  
11  3. Ne pas imposer de couvre-feu du tout parce qu'il y a très peu de malades au Sénégal

12 **C22. Selon vous, dans combien de temps est-ce que l'épidémie de Coronavirus sera terminée au Sénégal ?**  
13 **(en mois ou en semaines) ?** |\_\_|\_\_| mois **OU** |\_\_|\_\_| semaines



## QUELLE EST VOTRE PERCEPTION DES RISQUES DE CORONAVIRUS ?

### PR1. A quel point la possibilité d'attraper le Coronavirus vous inquiète-t-elle ?

Donnez une note entre 0 et 10 : la note 0 signifie que ça ne vous inquiète pas du tout, et la note 10 que ça vous inquiète énormément.

|   |   |   |   |   |   |   |   |   |   |    |
|---|---|---|---|---|---|---|---|---|---|----|
| 0 | 1 | 2 | 3 | 4 | 5 | 6 | 7 | 8 | 9 | 10 |
|---|---|---|---|---|---|---|---|---|---|----|

### PR2. Selon vous, quelle est la contagiosité du Coronavirus, c'est-à-dire la facilité avec laquelle ce virus peut se transmettre d'une personne à l'autre ?

Donnez une note entre 0 et 10 : la note 0 signifie que ça le Coronavirus est très peu contagieux et la note 10 qu'il est vraiment très contagieux.

|   |   |   |   |   |   |   |   |   |   |    |
|---|---|---|---|---|---|---|---|---|---|----|
| 0 | 1 | 2 | 3 | 4 | 5 | 6 | 7 | 8 | 9 | 10 |
|---|---|---|---|---|---|---|---|---|---|----|

### PR3. Selon vous, quelle est la gravité du Coronavirus ?

Donnez une note entre 0 et 10 : la note 0 signifie qu'attraper le Coronavirus n'est pas du tout grave et la note 10 que c'est vraiment très grave.

|   |   |   |   |   |   |   |   |   |   |    |
|---|---|---|---|---|---|---|---|---|---|----|
| 0 | 1 | 2 | 3 | 4 | 5 | 6 | 7 | 8 | 9 | 10 |
|---|---|---|---|---|---|---|---|---|---|----|

### PR4. Selon vous, sur 100 personnes qui attrapent le Coronavirus, combien d'entre elles pourraient mourir des suites de la maladie ?

Donnez un nombre entre 0 et 100 :      / \_ / \_ / \_ / personnes

## ET POUR LE PALUDISME ?

### PR1BIS. A quel point la possibilité d'attraper le paludisme vous inquiète-t-il ?

Donnez une note entre 0 et 10 : la note 0 signifie que ça ne vous inquiète pas du tout, et la note 10 que ça vous inquiète énormément.

|   |   |   |   |   |   |   |   |   |   |    |
|---|---|---|---|---|---|---|---|---|---|----|
| 0 | 1 | 2 | 3 | 4 | 5 | 6 | 7 | 8 | 9 | 10 |
|---|---|---|---|---|---|---|---|---|---|----|

### PR3BIS. Selon vous, quelle est la gravité du paludisme ?

Donnez une note entre 0 et 10 : la note 0 signifie qu'attraper le paludisme n'est pas du tout grave et la note 10 que c'est vraiment très grave.

|   |   |   |   |   |   |   |   |   |   |    |
|---|---|---|---|---|---|---|---|---|---|----|
| 0 | 1 | 2 | 3 | 4 | 5 | 6 | 7 | 8 | 9 | 10 |
|---|---|---|---|---|---|---|---|---|---|----|

### PR4BIS. Selon vous, sur 100 personnes qui attrapent le paludisme, combien d'entre elles pourraient mourir des suites de la maladie ?

Donnez un nombre entre 0 et 100 :      / \_ / \_ / \_ / personnes

## QUEL IMPACT DU CORONAVIRUS SUR VOTRE CUISINE ?

1  
2  
3  
4 **IC1. Combien de personnes vivent actuellement dans votre cuisine, y compris vous-même ?**

5 /\_/\_/\_/ personnes  
6

7 **IC2. Est-ce que des personnes qui vivent avec vous actuellement sont venues vous rejoindre à cause du**  
8 **Coronavirus ou du couvre-feu ?**  
9

- 10  1. Oui, à cause du Coronavirus  
11  2. Non, pour les récoltes ou le travail de la ferme  
12  3. Non, personne n'est venu nous rejoindre → Aller directement à la question IC7  
13

14  
15  
16 **↳ IC3. Si oui, combien ?** /\_/\_/\_/ personnes

17 Combien d'adultes ? /\_/\_/\_/ adultes

18 Combien d'enfants de moins de 15 ans ? /\_/\_/\_/ enfants  
19  
20  
21

22 **IC4. Quand ces personnes sont arrivées dans votre cuisine, avez-vous craint qu'elles soient malades du**  
23 **Coronavirus sans le savoir ?**  
24

- 25  1. Oui, tout à fait  2. Oui, plutôt  3. Non, plutôt pas  4. Non, pas du tout  
26  
27  
28  
29  
30  
31  
32  
33  
34  
35  
36  
37  
38  
39  
40  
41  
42  
43  
44  
45  
46  
47  
48  
49  
50  
51  
52  
53  
54  
55  
56  
57  
58  
59  
60

1  
2  
3  
4  
5  
6  
7  
8  
9  
10  
11  
12  
13  
14  
15  
16  
17  
18  
19  
20  
21  
22  
23  
24  
25  
26  
27  
28  
29  
30  
31  
32  
33  
34  
35  
36  
37  
38  
39  
40  
41  
42  
43  
44  
45  
46  
47  
48  
49  
50  
51  
52  
53  
54  
55  
56  
57  
58  
59  
60

**IC5. Qui sont ces personnes qui sont venus vous rejoindre et sont-elles toujours là ? Les questions suivantes**

**Personne 1 (adulte principal) :**

**A. Est-ce qu'il s'agit d'un homme ou d'une femme ?**  1. Homme  2. Femme

**B. Quel est son âge ?** |\_\_|\_\_| ans

**C. D'où venait cette personne ?** \_\_\_\_\_

**D. Quand cette personne est-elle arrivée ? (ou depuis combien de temps est-elle là ?)**

Arrivée le |\_\_|\_\_| **OU** présente depuis |\_\_|\_\_| mois / |\_\_|\_\_| semaines

**E. Est-ce que cette personne est étudiante ?**

1. Oui  2. Non

**F. Est-ce que cette personne avait un travail ou une activité économique avant de vous rejoindre ?**

1. Oui  2. Non

↳ **F1. Quelle était son activité principale (celle qui lui prend le plus de votre temps) ?** \_\_\_\_\_

**F2. Est-ce que cette personne aidait la cuisine en envoyant de l'argent ?**

1. Oui, régulièrement  2. Oui, quand elle le pouvait  2. Non

**G. Est-ce que cette personne est arrivée seule dans votre cuisine ?**

1. Oui  2. Non

↳ **G1. Combien d'adultes de 15 ans et plus l'accompagnait ?**

/\_/\_/\_/

**G2. Pour chaque adulte, quel est le lien de parenté avec la**

**Personne 1 ?** \_\_\_\_\_

**G3. Combien d'enfants de moins de 15 ans l'accompagnait ?**

/\_/\_/\_/

**G4. Quel âge ont les enfants ?** /\_/\_/\_/ /\_/\_/\_/ .....

**H. Est-ce que d'autres adultes, seuls ou accompagnés de leurs conjoints et enfants, sont venus vous rejoindre ?**

1. Oui  2. Non

**Pour chaque adulte, remplir une nouvelle fiche « Personne 2 » si d'autres sont présents**

**IC6. Est-ce que des personnes qui étaient venues vous rejoindre à cause du Coronavirus sont reparties dans leur vie habituelle ?**

1. Oui  2. Non

↳ **Si oui, combien ?** /\_/\_/\_/\_/ personnes

.....**Pourquoi sont-elles reparties ?**

1. La menace du Coronavirus était moins forte qu'on l'avait craint

2. Autre : \_\_\_\_\_

**Personne 1 (adulte principal) :**

A. Est-ce qu'il s'agit d'un homme ou d'une femme ?  1. Homme  2. Femme

B. Quel est son âge ? |\_|\_| ans

C. Combien de temps cette personne est-elle restée dans votre cuisine ?

D. Est-ce que cette personne est étudiante ?

1. Oui  2. Non

E. Où est reparti cette personne ? \_\_\_\_\_

F. Pourquoi est-ce que cette personne est repartie ?

1. La menace du Coronavirus était moins forte qu'on l'avait craint

2. Autre : \_\_\_\_\_

F. Est-ce que cette personne a un travail ou une activité économique qu'elle a retrouvé ?

1. Oui  2. Non

↳ F1. Quelle est son activité principale (celle qui lui prend le plus de votre temps) ? \_\_\_\_\_

F2. Actuellement, est-ce que cette personne aide la cuisine en envoyant de l'argent ?

1. Oui, régulièrement  2. Oui, quand elle le peut  2. Non

F2. Est-ce que cette personne aidait d'avantage la cuisine avant le Coronavirus ?

1. Oui  2. Non

G. Est-ce que cette personne est repartie seule ?

1. Oui  2. Non

↳ G1. Combien d'adultes de 15 ans et plus l'accompagnait ?

/\_/\_/

G2. Pour chaque adulte, quel est le lien de parenté avec la

Personne 1 ? \_\_\_\_\_

G2. Combien d'enfants de moins de 15 ans l'accompagnait ?

/\_/\_/

G3. Quel âge ont les enfants ? /\_/\_/ /\_/\_/ .....

**H. Est-ce que d'autres adultes, seuls ou accompagnés de leurs conjoints et enfants, sont venus vous rejoindre ?**

1. Oui  2. Non

**Pour chaque adulte, remplir une nouvelle fiche « Personne 2 » si d'autres sont présents**

**IC7. Est-ce que la vie dans votre cuisine est plus compliquée à cause du Coronavirus ?**

1. Oui, parce que nous sommes plus nombreux dans la cuisine
2. Oui, parce qu'il est difficile de vendre notre production au marché
3. Oui, parce qu'on a moins d'argent pour acheter ce dont on a besoin
4. Non, parce que nous sommes assez peu nombreux à vivre dans la cuisine
5. Non, parce que nous sommes plus nombreux à travailler
6. Autre : \_\_\_\_\_

**IC8. Avez-vous reçu une aide du gouvernement parce que vous étiez en difficulté à cause du Coronavirus ?**

1. Oui  2. Non

↳ Si oui, ...

**IC9. Avez-vous reçu une aide du maire parce que vous étiez en difficulté à cause du Coronavirus ?**

1. Oui  2. Non

↳ Si oui, de quoi s'agissait-il ? \_\_\_\_\_

**IC10. Avez-vous reçu une aide de personnes de bonne volonté ou de vos voisins parce que vous étiez en difficulté à cause du Coronavirus ?**

1. Oui  2. Non

↳ Si oui, de quoi s'agissait-il ? \_\_\_\_\_

**IC11. Vous-même, avez-vous aidé une autre cuisine qui était en difficulté à cause du Coronavirus ?**

1. Oui  2. Non

↳ Si oui, de quoi s'agissait-il ? \_\_\_\_\_

**IC14. A propos du Coronavirus, on entend beaucoup de choses. Etes-vous d'accord avec les affirmations suivantes ?****IC104A. Le COVID-19, c'est surtout une maladie de blanc.**

1. D'accord  2. Pas d'accord

**IC14B. Le COVID-19, c'est surtout une maladie des villes.**

1. D'accord  2. Pas d'accord

**IC14C. Le COVID-19, c'est juste une grippe.**

1. D'accord  2. Pas d'accord

**IC104D. Le COVID-19, c'est une punition divine.**

1. D'accord  2. Pas d'accord

1 **IC14E. On peut se protéger ou guérir du COVID-19 en mangeant certains aliments (ail, gingembre,**  
2 **citron vert...).**

- 3  1. D'accord  2. Pas d'accord

4  
5 **IC14F. On peut se protéger ou guérir du COVID-19 grâce à la prière.**

- 6  1. D'accord  2. Pas d'accord

7  
8  
9 **IC104G. On peut se protéger ou guérir du COVID-19 grâce à la médecine traditionnelle.**

- 10  1. D'accord  2. Pas d'accord

11  
12  
13 **IC14H. On peut se protéger ou guérir du COVID-19 grâce à des antibiotiques.**

- 14  1. D'accord  2. Pas d'accord

15  
16  
17 **IC14I. Le COVID-19 se transmet par les moustiques.**

- 18  1. D'accord  2. Pas d'accord

19  
20  
21 **IC14J. Le COVID-19 se transmet par l'air.**

- 22  1. D'accord  2. Pas d'accord

23  
24 **IC14K. Le COVID-19 se transmet par les ondes 5G.**

- 25  1. D'accord  2. Pas d'accord

26  
27  
28 **IC14L. Le COVID-19 disparaît au soleil ou quand il fait chaud.**

- 29  1. D'accord  2. Pas d'accord

## POUR TERMINER...

**D1. Comment vous sentez-vous aujourd'hui, sur une échelle de 0 à 10 (indiquez votre réponse entre 0 (Tout à fait mal) et 10 (Tout à fait bien))**

|  | Tout à fait<br>mal |   |   |   |   |   |   |   |   | Tout à fait<br>bien |    |
|--|--------------------|---|---|---|---|---|---|---|---|---------------------|----|
|  | 0                  | 1 | 2 | 3 | 4 | 5 | 6 | 7 | 8 | 9                   | 10 |

**D2. Quel est votre statut matrimonial ?**

- 1. Marié(e)
- 2. Célibataire
- 3. Veuf(ve)
- 4. Divorcé(e)

**D3. Si vous êtes marié(e), êtes-vous dans une union...**

- 1. Polygame
- 2. Monogame
- 3. Non concerné (non marié)

**D4. Est-ce que votre (première) épouse est inquiète qu'un membre de votre cuisine attrape le coronavirus ?**

- 1. Très inquiète
- 2. Plutôt inquiète
- 3. Plutôt pas inquiète
- 4. Pas inquiète du tout

**D5. Comment votre (première) épouse voit-elle son risque d'attraper le Coronavirus ? Est-ce que pour elle, il est ?**

- 1. Très faible
- 2. Plutôt faible
- 3. Plutôt élevé
- 4. Très élevé

**D6. Par rapport aux femmes de son âge, comment votre (première) épouse voit-elle son risque d'attraper le Coronavirus est :**

- 1. Beaucoup moins importants que pour les autres femmes de son âge
- 2. Moins importants que pour les autres femmes de son âge
- 3. Ni plus ni moins importants que pour les autres femmes de son âge
- 4. Plus importants que pour les autres femmes de son âge
- 5. Beaucoup plus importants que pour les autres femmes de son âge

**D7. Combien d'enfants avez-vous ?** | \_ | \_ |

**D8. A propos des enfants, êtes-vous d'accord pour qu'ils retournent à l'école ?**

- 1. Oui, tout à fait
- 2. Oui, plutôt
- 3. Non, plutôt pas
- 4. Non, pas du tout

**Si D8=3 ou 4, Pourquoi ?** \_\_\_\_\_

1 **D9. Vous-même, êtes-vous allé à l'école publique (quelquefois appelée école « française ») ?**

- 2  1. Oui  2. Non

3  
4 **↳ Jusqu'à quelle classe ? \_\_\_\_\_ OU Jusqu'à quel âge ? \_\_\_\_\_ OU Combien d'années ? \_\_\_\_\_**

7 **D10. Etes-vous allée à l'école coranique ?**

- 8  1. Oui  2. Non

9  
10  
11 **↳ Pendant combien d'années ? \_\_\_\_\_**

14 **D11. Quelle est votre activité principale (celle qui vous prend le plus de votre temps) :**

17  
18 **D12. Dans cette activité, vous travaillez comme :** (une seule réponse possible)

- 19  1. Fonctionnaire  
20  2. Salarié avec un contrat écrit  
21  3. Salarié avec un accord oral  
22  4. Indépendant à votre compte et sans employé  
23  5. Entrepreneur ou patron, avec employé(s)  
24  6. Apprenti  
25  7. Aide familiale

26  
27  
28 **D13. Si, au cours des 12 derniers mois, vous n'avez pas travaillé et vous n'avez pas eu d'activité**  
29 **économique, quelle est votre situation actuelle ?**

- 30  1. En recherche d'emploi  
31  2. Personne âgée ne travaillant plus/ retraité(e)  
32  3. Etude/ formation  
33  4. Invalidité/ handicap permanent/ longue maladie  
34  5. Autre sans occupation (personne au foyer)



## Epouse en charge : A PROPOS DU CORONAVIRUS...

### C1. Avez-vous déjà entendu parler du Coronavirus ?

1. Oui  2. Non → **Aller à la question IC1**

### C3. Est-ce que vous allez sur Internet pour avoir des informations sur le Coronavirus ?

1. Oui, tous les jours  
 2. Oui, quelques fois par semaine  
 3. Oui, de temps en temps  
 4. Non, jamais

### C4. Avez-vous acheté des masques au cours des 2 dernières semaines ? (plusieurs réponses possibles)

1. Oui, combien ? \_\_\_\_\_  
 2. Non, on a bénéficié de la distribution de masques  
 2. Non, on en a fabriqué nous-mêmes  
 3. Non et on n'en porte pas

### C5. Avez-vous acheté du gel hydroalcoolique au cours des 2 dernières semaines ?

1. Oui  
 2. Non, mais j'aimerais en trouver  
 2. Non et je n'en ressens pas le besoin

### C6. Actuellement, êtes-vous inquiète qu'un membre de votre cuisine attrape le coronavirus ?

1. Très inquiète  2. Plutôt inquiète  3. Plutôt pas inquiète  4. Pas inquiète du tout

### C7. Avez-vous changé vos habitudes pour éviter que le Coronavirus arrive dans votre cuisine ? (plusieurs réponses possibles)

1. Vous n'avez rien changé à vos habitudes  
 2. Chacun doit se laver les mains à chaque fois que vous revenez à la cuisine  
 3. Chacun doit se laver les mains seulement quand vous revenez du marché ou du magasin  
 4. Chacun doit porter un masque pour aller au marché ou au magasin  
 5. Vous utilisez du désinfectant pour nettoyer la cuisine  
 6. Autre : \_\_\_\_\_

### C8. Pour vous-même, pensez-vous que votre risque d'attraper le Coronavirus est ?

1. Très faible  
 2. Plutôt faible  
 3. Plutôt élevé  
 4. Très élevé

### C9. Par rapport aux femmes de votre âge, est-ce que vous pensez que votre risque d'attraper le Coronavirus est ?

1. Beaucoup moins importants que pour les autres femmes de mon âge  
 2. Moins importants que pour les autres femmes de mon âge  
 3. Ni plus ni moins importants que pour les autres femmes de mon âge  
 4. Plus importants que pour les autres femmes de mon âge  
 5. Beaucoup plus importants que pour les autres femmes de mon âge

**C10. Est-ce que des personnes qui vivent avec vous actuellement sont venues vous rejoindre à cause du Coronavirus ?**

1. Oui, à cause du Coronavirus  
 2. Non, pour les récoltes ou le travail de la ferme  
 3. Non, personne n'est venu nous rejoindre

**Si C10=1,2 ou 3 : C10A. Quand ces personnes sont arrivées dans votre cuisine, avez-vous craint que certaines d'entre elles soient malades du Coronavirus sans le savoir ?**

1. Oui, tout à fait     2. Oui, plutôt     3. Non, plutôt pas     4. Non, pas du tout

**C11. Avez-vous pris des précautions pour éviter le Coronavirus dans votre cuisine ?**

1. Oui     2. Non

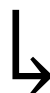

**Si oui, lesquelles ?** \_\_\_\_\_

**C12. Si vous ou un membre de votre famille attrapait le Coronavirus, où iriez-vous pour les soins ?**

1. Poste de Sante     2. Guérisseur     3. Autre ; Préciser \_\_\_\_\_

**C13. Pensez-vous à un médicament pour soigner le coronavirus ?**

1. Oui     2. Non

**C13A. Si oui, lequel ?** \_\_\_\_\_

**C14. En général, craignez-vous d'acheter de faux médicaments ?**

1. Oui, tout à fait     2. Oui, plutôt     3. Non, plutôt pas     4. Non, pas du tout

**C15. En général, êtes-vous réticente à l'idée de vous faire vacciner ?**

1. Oui, tout à fait     2. Oui, plutôt     3. Non, plutôt pas     4. Non, pas du tout

**C16. Si un vaccin contre le Coronavirus était disponible et gratuit, est-ce que vous voudriez vous faire vacciner ?**

1. Oui, certainement     2. Oui, probablement     3. Non, probablement pas     4. Non, certainement pas

**Si C16=3ou4 : C16A. Pour quelles raisons ne vous feriez-vous pas vacciner ?**

1. Vous êtes contre la vaccination en général  
 2. Vous pensez qu'un vaccin élaboré dans l'urgence est trop dangereux  
 3. Vous pensez que c'est inutile parce que le COVID-19 est peu dangereux  
 4. Autre : \_\_\_\_\_

**C17. Si un vaccin contre le Coronavirus était disponible et gratuit, est-ce que vous voudriez faire vacciner les enfants ?**

1. Oui, certainement     2. Oui, probablement     3. Non, probablement pas     4. Non, certainement pas

**C18. Connaissez-vous des personnes dans votre famille, ou parmi vos amis ou connaissances, qui sont, ou qui ont été malades du Coronavirus ?**

1. Oui, dans la famille     2. Oui, parmi les amis ou connaissances  
 3. Oui, à la fois dans la famille et parmi les amis ou connaissances     3. Non

**C19. Si C18=1 à 3 :, est-ce qu'il s'agit de personnes qui vivent actuellement avec vous ?**

1. Oui  2. Non

↳ **C19.A. Quel est votre lien de parenté avec cette ou ces personnes ?** \_\_\_\_\_

**C19.B. Avez-vous pris des précautions pour éviter d'être contaminés à votre tour par le Coronavirus ?**

2. Non, et personne l'a attrapé dans la cuisine  
 2. Non, mais une ou plusieurs personnes de la cuisine ont attrapé le Coronavirus  
 1. Oui : Lesquelles ? \_\_\_\_\_

**C19.C. Est-ce que la ou les personnes malades sont allées dans un centre de traitement ?**

1. Oui, toutes sont allées dans un centre de traitement  
 2. Non, certaines ont refusé d'aller dans un centre de traitement  
 2. Non, aucune n'est allée dans un centre de traitement

**C19.D. Est-ce que la ou les personnes malades sont aujourd'hui guéries ?**

1. Oui, toutes  2. Non, certaines ont des séquelles  2. Non, certaines sont décédées

↳ **C19.F. Comment est-ce que cette/ces personnes ont été soignées ?**

1. Toutes par Chloroquine  
 1. Certaines par Chloroquine et d'autres par médecine traditionnelle  
 2. Toutes par médecine traditionnelle  
 3. Autre : \_\_\_\_\_

**C20. Selon vous, est-ce que le couvre-feu dans le bassin de Niakhar est nécessaire pour limiter l'épidémie de Coronavirus ?**

1. Oui, tout à fait  2. Oui, plutôt  3. Non, plutôt pas  4. Non, pas du tout

**C21. Selon vous, est-ce que le couvre-feu dans les villes permet de limiter l'épidémie de Coronavirus ?**

1. Oui, tout à fait  2. Oui, plutôt  3. Non, plutôt pas  4. Non, pas du tout

**C22. Selon vous, qu'est-ce qui est préférable ?**

1. Imposer le couvre-feu seulement dans les zones où il y a des malades du Coronavirus  
 2. Imposer le couvre-feu dans tout le Sénégal pour que tous les citoyens vivent la même chose  
 3. Ne pas imposer de couvre-feu du tout parce qu'il y a peu de malades au Sénégal

**C23. Selon vous, dans combien de temps est-ce que l'épidémie de Coronavirus sera terminée au Sénégal ? (en mois ou en semaines)**

\_\_|\_\_| mois **OU** \_\_|\_\_| semaines

## QUELLE EST VOTRE PERCEPTION DES RISQUES DE CORONAVIRUS ?

### PR1. A quel point la possibilité d'attraper le Coronavirus vous inquiète-t-elle ?

Donnez une note entre 0 et 10 : la note 0 signifie que ça ne vous inquiète pas du tout, et la note 10 que ça vous inquiète énormément.

|   |   |   |   |   |   |   |   |   |   |    |
|---|---|---|---|---|---|---|---|---|---|----|
| 0 | 1 | 2 | 3 | 4 | 5 | 6 | 7 | 8 | 9 | 10 |
|---|---|---|---|---|---|---|---|---|---|----|

### PR2. Selon vous, quelle est la contagiosité du Coronavirus, c'est-à-dire la facilité avec laquelle ce virus peut se transmettre d'une personne à l'autre ?

Donnez une note entre 0 et 10 : la note 0 signifie que ça le Coronavirus est très peu contagieux et la note 10 qu'il est vraiment très contagieux.

|   |   |   |   |   |   |   |   |   |   |    |
|---|---|---|---|---|---|---|---|---|---|----|
| 0 | 1 | 2 | 3 | 4 | 5 | 6 | 7 | 8 | 9 | 10 |
|---|---|---|---|---|---|---|---|---|---|----|

### PR3. Selon vous, quelle est la gravité du Coronavirus ?

Donnez une note entre 0 et 10 : la note 0 signifie qu'attraper le Coronavirus n'est pas du tout grave et la note 10 que c'est vraiment très grave.

|   |   |   |   |   |   |   |   |   |   |    |
|---|---|---|---|---|---|---|---|---|---|----|
| 0 | 1 | 2 | 3 | 4 | 5 | 6 | 7 | 8 | 9 | 10 |
|---|---|---|---|---|---|---|---|---|---|----|

### PR4. Selon vous, sur 100 personnes qui attrapent le Coronavirus, combien d'entre elles pourraient mourir des suites de la maladie ?

Donnez un nombre entre 0 et 100 :

/ \_ / \_ / \_ / personnes

## ET POUR LE PALUDISME ?

### PR1BIS. A quel point la possibilité d'attraper le paludisme vous inquiète-t-il ?

Donnez une note entre 0 et 10 : la note 0 signifie que ça ne vous inquiète pas du tout, et la note 10 que ça vous inquiète énormément.

|   |   |   |   |   |   |   |   |   |   |    |
|---|---|---|---|---|---|---|---|---|---|----|
| 0 | 1 | 2 | 3 | 4 | 5 | 6 | 7 | 8 | 9 | 10 |
|---|---|---|---|---|---|---|---|---|---|----|

### PR3BIS. Selon vous, quelle est la gravité du paludisme ?

Donnez une note entre 0 et 10 : la note 0 signifie qu'attraper le paludisme n'est pas du tout grave et la note 10 que c'est vraiment très grave.

|   |   |   |   |   |   |   |   |   |   |    |
|---|---|---|---|---|---|---|---|---|---|----|
| 0 | 1 | 2 | 3 | 4 | 5 | 6 | 7 | 8 | 9 | 10 |
|---|---|---|---|---|---|---|---|---|---|----|

### PR4BIS. Selon vous, sur 100 personnes qui attrapent le paludisme, combien d'entre elles pourraient mourir des suites de la maladie ?

Donnez un nombre entre 0 et 100 :

/ \_ / \_ / \_ / personnes

## QUEL IMPACT DU CORONAVIRUS SUR VOTRE CUISINE ?

### IC1. Comment évaluez-vous l'impact de l'épidémie de Coronavirus sur votre vie personnelle en général ?

1. C'est très négatif
2. Il y a plus de mauvais que du bon
3. En fait, ça ne change pas grand chose par rapport à ma vie d'avant
4. Il y a plus de bon que de mauvais
5. C'est très positif

### IC2. Comment évaluez-vous l'impact de l'épidémie de Coronavirus sur la cuisine ?

1. C'est très négatif
2. Il y a plus de mauvais que du bon
3. En fait, ça ne change pas grand chose par rapport à avant
4. Il y a plus de bon que de mauvais
5. C'est très positif

### IC3. Est-ce qu'à cause du couvre-feu, il est plus difficile qu'avant d'acheter ce dont vous avez besoin ?

1. Oui, parce que les prix ont augmenté
2. Oui, parce qu'on trouve plus difficilement ce qu'on cherche
3. Oui, pour d'autres raisons ; Lesquelles : \_\_\_\_\_
4. Non

### IC4. Est-ce qu'à cause du couvre-feu, il est plus difficile qu'avant de vendre votre production ?

1. Oui, parce que les gros marchés sont fermés
2. Oui, parce que vous n'arrivez pas à vendre vos produits au prix qu'ils devraient avoir
3. Oui, pour d'autres raisons ; Lesquelles : \_\_\_\_\_
4. Non

### IC5. Actuellement, est-ce que c'est compliqué de nourrir tout le monde dans la cuisine ?

1. Oui, tout à fait     2. Oui, plutôt     3. Non, plutôt pas     4. Non, pas du tout

### IC6. Si IC3=1 à 3 : Selon vous, est-ce que vous avez ces difficultés à cause du Coronavirus ?

1. Oui, tout à fait     2. Oui, plutôt     3. Non, plutôt pas     4. Non, pas du tout

### IC7. On entend beaucoup de choses à propos du Coronavirus. Etes-vous d'accord avec les affirmations suivantes ?

#### IC7A. Le COVID-19, c'est surtout une maladie de blanc.

1. D'accord     2. Pas d'accord

#### IC7B. Le COVID-19, c'est surtout une maladie des villes.

1. D'accord     2. Pas d'accord

#### IC7C. Le COVID-19, c'est juste une grippe.

1. D'accord     2. Pas d'accord

#### IC7D. Le COVID-19, c'est une punition divine.

1. D'accord     2. Pas d'accord

#### IC7E. On peut se protéger ou guérir du COVID-19 en mangeant certains aliments (ail, gingembre ...).

1. D'accord     2. Pas d'accord

#### IC7F. On peut se protéger ou guérir du COVID-19 grâce à la prière.

1. D'accord     2. Pas d'accord

1 **IC7G. On peut se protéger ou guérir du COVID-19 grâce à la médecine traditionnelle.**

- 2  1. D'accord  2. Pas d'accord

3 **IC7H. On peut se protéger ou guérir du COVID-19 grâce à des antibiotiques.**

- 4  1. D'accord  2. Pas d'accord

5 **IC7I. Le COVID-19 se transmet par les moustiques.**

- 6  1. D'accord  2. Pas d'accord

7 **IC7J. Le COVID-19 se transmet par l'air.**

- 8  1. D'accord  2. Pas d'accord

9 **IC7K. Le COVID-19 se transmet par les ondes 5G.**

- 10  1. D'accord  2. Pas d'accord

11 **IC7L. Le COVID-19 disparaît au soleil ou quand il fait chaud.**

- 12  1. D'accord  2. Pas d'accord

13  
14  
15  
16  
17  
18  
19  
20  
21  
22  
23  
24  
25  
26  
27  
28  
29  
30  
31  
32  
33  
34  
35  
36  
37  
38  
39  
40  
41  
42  
43  
44  
45  
46  
47  
48  
49  
50  
51  
52  
53  
54  
55  
56  
57  
58  
59  
60

For peer review only

## POUR TERMINER...

**D1. Comment vous sentez-vous aujourd'hui, sur une échelle de 0 à 10 (indiquez votre réponse entre 0 (Tout à fait mal) et 10 (Tout à fait bien))**

|  | Tout à fait mal |   |   |   |   |   |   |   |   | Tout à fait bien |    |
|--|-----------------|---|---|---|---|---|---|---|---|------------------|----|
|  | 0               | 1 | 2 | 3 | 4 | 5 | 6 | 7 | 8 | 9                | 10 |

**D2. Est-ce que votre mari est inquiet qu'un membre de votre cuisine attrape le Coronavirus ?**

1. Très inquiet     2. Plutôt inquiet     3. Plutôt pas inquiet     4. Pas inquiet du tout

**D3. Comment votre mari voit-il son risque d'attraper le Coronavirus ? Est-ce que pour lui, son risque est ?**

1. Très faible  
 2. Plutôt faible  
 3. Plutôt élevé  
 4. Très élevé

**D4. Par rapport aux hommes de son âge, comment votre mari voit-il son risque d'attraper le Coronavirus ? Est-ce que pour lui, son risque est ?**

1. Beaucoup moins importants que pour les autres hommes de son âge  
 2. Moins importants que pour les autres hommes de son âge  
 3. Ni plus ni moins importants que pour les autres hommes de son âge  
 4. Plus importants que pour les autres hommes de son âge  
 5. Beaucoup plus importants que pour les autres hommes de son âge

**D5. A propos des enfants, êtes-vous d'accord pour qu'ils retournent à l'école ?**

1. Oui, tout à fait     2. Oui, plutôt     3. Non, plutôt pas     4. Non, pas du tout

**Si D5=3 ou 4, Pourquoi ?** \_\_\_\_\_

**D6. Vous-même, êtes-vous allée à l'école publique (quelquefois appelée école « française ») ?**

1. Oui     2. Non

↳ **Jusqu'à quelle classe ?** \_\_\_\_\_ **OU** **Jusqu'à quel âge ?** \_\_\_\_\_ **OU** **Combien d'années ?** \_\_\_\_\_

**D7. Etes-vous allée à l'école coranique ?**

1. Oui     2. Non

↳ **Pendant combien d'années ?** \_\_\_\_\_

## Nouvel arrivant : A PROPOS DU CORONAVIRUS...

**C1. Confirmez-vous que vous vivez actuellement dans la cuisine à cause du Coronavirus ?**

1. Oui  2. Non

↳ **C1A. Quelle est la principale raison qui vous a poussé(e) à rejoindre la cuisine ?**

1. La peur d'attraper le Coronavirus  
 2. La peur de ne plus gagner assez d'argent pour vivre  
 .... 3. Autre : \_\_\_\_\_

**C2. Etes-vous étudiant ?**

1. Oui  2. Non

↳ **C2A. Quelle est la principale raison qui vous a poussé(e) à rejoindre la cuisine ?**

1. La peur d'attraper le Coronavirus  
 2. La peur de ne plus gagner assez d'argent pour vivre  
 .... 3. Autre : \_\_\_\_\_

**Si C1=2 et C2=2, alors STOP.**

**C3. Est-ce que vous allez sur Internet pour avoir des informations sur le Coronavirus ?**

1. Oui, tous les jours  
 2. Oui, quelques fois par semaine  
 3. Oui, de temps en temps  
 4. Non, jamais

**C4. Quand vous êtes arrivé(e) dans la cuisine, est-ce que vous aviez-vous peur d'être malade du Coronavirus sans le savoir ?**

1. Oui, tout à fait  2. Oui, plutôt  3. Non, plutôt pas  4. Non, pas du tout

**C5. A votre arrivée, est-ce que des précautions ont été prises pour éviter le Coronavirus ?**

1. Oui  2. Non

↳ **C5.A. Est-ce que vous dormiez à l'écart des autres membres de la famille ?**

1. Oui  2. Non

**C5.B. Est-ce que vous preniez vos repas à l'écart des autres membres de la famille ?**

1. Oui  2. Non

**C5.C. Au bout de combien de temps avez-vous pu vous joindre au reste de la famille ?**

/ \_\_ / \_\_ / jours

**C5.D. Est-ce que cette expérience a été difficile ?**

1. Oui, tout à fait  2. Oui, plutôt  3. Non, plutôt pas  4. Non, pas du tout



**C6. Actuellement, êtes-vous inquiet qu'un membre de la cuisine attrape le coronavirus ?**

1. Très inquiet     2. Plutôt inquiet     3. Plutôt pas inquiet     4. Pas inquiet du tout

**C7. Pour vous-même, pensez-vous que votre risque d'attraper le Coronavirus est ?**

1. Très faible  
 2. Plutôt faible  
 3. Plutôt élevé  
 4. Très élevé

**C8. Par rapport aux hommes/femmes de votre âge, est-ce que vous pensez que votre risque d'attraper le Coronavirus est :**

1. Beaucoup moins importants que pour les autres hommes/femmes de mon âge  
 2. Moins importants que pour les autres hommes/femmes de mon âge  
 3. Ni plus ni moins importants que pour les autres hommes/femmes de mon âge  
 4. Plus importants que pour les autres hommes/femmes de mon âge  
 5. Beaucoup plus importants que pour les autres hommes/femmes de mon âge

**C9. Si vous ou un membre de votre famille attrapait le Coronavirus, où iriez-vous pour les soins ?**

1. Poste de Santé     2. Guérisseur     3. Autre ; Préciser \_\_\_\_\_

**C10. Pensez-vous à un médicament pour soigner le coronavirus ?**

1. Oui     2. Non

**C10A. Si oui, lequel ?** \_\_\_\_\_

**C11. En général, craignez-vous d'acheter de faux médicaments ?**

1. Oui, tout à fait     2. Oui, plutôt     3. Non, plutôt pas     4. Non, pas du tout

**C12. En général, êtes-vous réticent(e) à l'idée de vous faire vacciner ?**

1. Oui, tout à fait     2. Oui, plutôt     3. Non, plutôt pas     4. Non, pas du tout

**C13. Si un vaccin contre le Coronavirus était disponible et gratuit, est-ce que vous voudriez vous faire vacciner ?**

1. Oui, certainement     2. Oui, probablement     3. Non, probablement pas     4. Non, certainement pas

**Si C16=3 ou 4 : C16A. Pour quelles raisons ne vous feriez-vous pas vacciner ?**

1. Vous êtes contre la vaccination en général  
 2. Vous pensez qu'un vaccin élaboré dans l'urgence est trop dangereux  
 3. Vous pensez que c'est inutile parce que le COVID-19 est peu dangereux  
 4. Autre : \_\_\_\_\_

**C14. Si un vaccin contre le Coronavirus était disponible et gratuit, est-ce que vous voudriez faire vacciner vos enfants ?**

1. Oui, certainement     2. Oui, probablement     3. Non, probablement pas     4. Non, certainement pas

1 **C16. Connaissez-vous des personnes dans votre famille, ou parmi vos amis ou connaissances, qui sont, ou**  
2 **qui ont été malades du Coronavirus ?**

- 3  1. Oui, dans la famille     2. Oui, parmi les amis ou connaissances  
4  3. Oui, à la fois dans la famille et parmi les amis ou connaissances     3. Non

7 **C17. Selon vous, est-ce que le couvre-feu dans le bassin de Niakhar est nécessaire pour limiter**  
8 **l'épidémie de Coronavirus?**

- 10  1. Oui, tout à fait     2. Oui, plutôt     3. Non, plutôt pas     4. Non, pas du tout

12 **C18. Selon vous, est-ce que le couvre-feu dans les villes permet de limiter l'épidémie de Coronavirus ?**

- 14  1. Oui, tout à fait     2. Oui, plutôt     3. Non, plutôt pas     4. Non, pas du tout

16 **C19. Selon vous, qu'est-ce qui est préférable ?**

- 17  1. Imposer le couvre-feu seulement dans les zones où il y a des malades du Coronavirus  
18  2. Imposer le couvre-feu dans tout le Sénégal pour que tous les citoyens vivent la même chose  
19  3. Ne pas imposer de couvre-feu du tout parce qu'il y a peu de malades au Sénégal

23 **C20. Selon vous, dans combien de temps est-ce que l'épidémie de Coronavirus sera terminée ?**  
24 **(en mois ou en semaines)**

25 |\_\_|\_\_| mois **OU** |\_\_|\_\_| semaines

## QUELLE EST VOTRE PERCEPTION DES RISQUES DE CORONAVIRUS ?

### PR1. A quel point la possibilité d'attraper le Coronavirus vous inquiète-t-elle ?

Donnez une note entre 0 et 10 : la note 0 signifie que ça ne vous inquiète pas du tout, et la note 10 que ça vous inquiète énormément.

|   |   |   |   |   |   |   |   |   |   |    |
|---|---|---|---|---|---|---|---|---|---|----|
| 0 | 1 | 2 | 3 | 4 | 5 | 6 | 7 | 8 | 9 | 10 |
|---|---|---|---|---|---|---|---|---|---|----|

### PR2. Selon vous, quelle est la contagiosité du Coronavirus, c'est-à-dire la facilité avec laquelle ce virus peut se transmettre d'une personne à l'autre ?

Donnez une note entre 0 et 10 : la note 0 signifie que le Coronavirus est très peu contagieux et la note 10 qu'il est vraiment très contagieux.

|   |   |   |   |   |   |   |   |   |   |    |
|---|---|---|---|---|---|---|---|---|---|----|
| 0 | 1 | 2 | 3 | 4 | 5 | 6 | 7 | 8 | 9 | 10 |
|---|---|---|---|---|---|---|---|---|---|----|

### PR3. Selon vous, quelle est la gravité du Coronavirus ?

Donnez une note entre 0 et 10 : la note 0 signifie qu'attraper le Coronavirus n'est pas du tout grave et la note 10 que c'est vraiment très grave.

|   |   |   |   |   |   |   |   |   |   |    |
|---|---|---|---|---|---|---|---|---|---|----|
| 0 | 1 | 2 | 3 | 4 | 5 | 6 | 7 | 8 | 9 | 10 |
|---|---|---|---|---|---|---|---|---|---|----|

### PR4. Selon vous, sur 100 personnes qui attrapent le Coronavirus, combien d'entre elles pourraient mourir des suites de la maladie ?

Donnez un nombre entre 0 et 100 :      / \_ / \_ / \_ / personnes

## ET POUR LE PALUDISME ?

### PR1BIS. A quel point la possibilité d'attraper le paludisme vous inquiète-t-il ?

Donnez une note entre 0 et 10 : la note 0 signifie que ça ne vous inquiète pas du tout, et la note 10 que ça vous inquiète énormément.

|   |   |   |   |   |   |   |   |   |   |    |
|---|---|---|---|---|---|---|---|---|---|----|
| 0 | 1 | 2 | 3 | 4 | 5 | 6 | 7 | 8 | 9 | 10 |
|---|---|---|---|---|---|---|---|---|---|----|

### PR3BIS. Selon vous, quelle est la gravité du paludisme ?

Donnez une note entre 0 et 10 : la note 0 signifie qu'attraper le paludisme n'est pas du tout grave et la note 10 que c'est vraiment très grave.

|   |   |   |   |   |   |   |   |   |   |    |
|---|---|---|---|---|---|---|---|---|---|----|
| 0 | 1 | 2 | 3 | 4 | 5 | 6 | 7 | 8 | 9 | 10 |
|---|---|---|---|---|---|---|---|---|---|----|

### PR4BIS. Selon vous, sur 100 personnes qui attrapent le paludisme, combien d'entre elles pourraient mourir des suites de la maladie ?

Donnez un nombre entre 0 et 100 :      / \_ / \_ / \_ / personnes

**D1. Comment évaluez-vous l'impact de l'épidémie de Coronavirus sur votre vie personnelle en général ?**

- 1. C'est très négatif
- 2. Il y a plus de mauvais que du bon
- 3. En fait, ça ne change pas grand chose par rapport à ma vie d'avant
- 4. Il y a plus de bon que de mauvais
- 5. C'est très positif

**D2. Comment évaluez-vous l'impact de l'épidémie de Coronavirus sur la cuisine ?**

- 1. C'est très négatif
- 2. Il y a plus de mauvais que du bon
- 3. En fait, ça ne change pas grand chose par rapport à avant
- 4. Il y a plus de bon que de mauvais
- 5. C'est très positif

**D3. A propos du Coronavirus, on entend beaucoup de choses. Etes-vous d'accord avec les affirmations suivantes ?**

**D3A. Le COVID-19, c'est surtout une maladie de blanc.**

- 1. D'accord
- 2. Pas d'accord

**D3B. Le COVID-19, c'est surtout une maladie des villes.**

- 1. D'accord
- 2. Pas d'accord

**D3C. Le COVID-19, c'est juste une grippe.**

- 1. D'accord
- 2. Pas d'accord

**D3D. Le COVID-19, c'est une punition divine.**

- 1. D'accord
- 2. Pas d'accord

**D3E. On peut se protéger ou guérir du COVID-19 en mangeant certains aliments (ail, gingembre, citron vert...).**

- 1. D'accord
- 2. Pas d'accord

**D3F. On peut se protéger ou guérir du COVID-19 grâce à la prière.**

- 1. D'accord
- 2. Pas d'accord

**D3G. On peut se protéger ou guérir du COVID-19 grâce à la médecine traditionnelle.**

- 1. D'accord
- 2. Pas d'accord

**D3H. On peut se protéger ou guérir du COVID-19 grâce à des antibiotiques.**

- 1. D'accord
- 2. Pas d'accord

**D3I. Le COVID-19 se transmet par les moustiques.**

- 1. D'accord
- 2. Pas d'accord

**D3J. Le COVID-19 se transmet par l'air.**

- 1. D'accord
- 2. Pas d'accord

**D3K. Le COVID-19 se transmet par les ondes 5G.**

- 1. D'accord
- 2. Pas d'accord

**D3L. Le COVID-19 disparaît au soleil ou quand il fait chaud.**

- 1. D'accord
- 2. Pas d'accord

## POUR TERMINER...

**D1. Comment vous sentez-vous aujourd'hui, sur une échelle de 0 à 10 (indiquez votre réponse entre 0 (Tout à fait mal) et 10 (Tout à fait bien))**

| Tout à fait mal |   |   |   |   |   |   |   |   | Tout à fait bien |    |
|-----------------|---|---|---|---|---|---|---|---|------------------|----|
| 0               | 1 | 2 | 3 | 4 | 5 | 6 | 7 | 8 | 9                | 10 |

**D2. Selon vous, est-ce que le chef de ménage et sa (première) épouse sont inquiets qu'un membre de la cuisine attrape le Coronavirus ?**

1. Très inquiets   
  2. Plutôt inquiets   
  3. Plutôt pas inquiets   
  4. Pas inquiets du tout

**D3. Quel est votre statut matrimonial ?**

1. Marié(e)  
 2. Célibataire  
 3. Veuf(ve)  
 4. Divorcé(e)

**D4. Si vous êtes marié(e), êtes-vous dans une union...**

1. Polygame  
 2. Monogame  
 3. Non concerné (non marié)

**D5. Avez-vous des enfants ?**

1. Oui     2. Non

**D6. Si D4=1 : Combien ? \_\_\_\_\_ de quel(s) âge(s) ? \_\_\_\_\_**

**D7. Quelle est votre activité principale (celle qui vous prend le plus de votre temps) : \_\_\_\_\_**

**D8. Dans cette activité, vous travaillez comme : (une seule réponse possible)**

1. Fonctionnaire  
 2. Salarié avec un contrat écrit  
 3. Salarié avec un accord oral  
 4. Indépendant à votre compte et sans employé  
 5. Entrepreneur ou patron, avec employé(s)  
 6. Apprenti  
 7. Aide familiale

**D9. Est-ce que votre activité est dans le secteur ?**

1. Des transports  
 2. De la pêche  
 3. Du tourisme  
 3. Non, un autre secteur

**D10. Si, au cours des 12 derniers mois, vous n'avez pas travaillé et vous n'avez pas eu d'activité économique, quelle est votre situation actuelle ?**

1. En recherche d'emploi  
 2. Personne âgée ne travaillant plus/ retraité(e)  
 3. Etude/ formation  
 4. Invalidité/ handicap permanent/ longue maladie  
 5. Autre sans occupation (personne au foyer)
