# Supplementary material for: COVID-19-related attitudes, risk perceptions, preventive behaviours and economic impact in sub-Saharan African countries: implementing a longitudinal phone-based survey protocol in rural Senegalese households
Source: PubMed Central journal article supplement — BMJ Open. 2021 Jul 16;11(7):e050090. doi: 10.1136/bmjopen-2021-050090 (PMC8288240; doi:10.1136/bmjopen-2021-050090), 2021-07-16
Supplement: bmjopen-2021-050090supp001.pdf [file bmjopen-2021-050090supp001.pdf]

## Chef de famille : A PROPOS DU CORONAVIRUS...

### C1. Avez-vous déjà entendu parler du Coronavirus ?

1. Oui  2. Non → **Aller à la question IC1**

### C2. Quand avez-vous appris qu'il y a une épidémie de Coronavirus ?

1. Quand l'épidémie était en Chine ou en Asie  
 2. Quand l'épidémie est arrivée en Europe  
 3. Quand l'épidémie est arrivée en Afrique  
 4. Quand l'épidémie est arrivée au Sénégal  
 5. Autre : \_\_\_\_\_

### C3. Comment avez-vous appris qu'il y a une épidémie de Coronavirus ?

1. Par la radio ou la télévision  
 2. Par Internet  
 3. Par des membres de la famille en ville  
 4. Par des voisins  
 5. Par le chef du village  
 6. Par le Centre de santé  
 7. Par votre représentant religieux (l'imam ou le curé)  
 8. Par les relais communautaires  
 9. Par les Badienou Gokh  
 10. Autre : \_\_\_\_\_

### C4. Avez-vous accès à Internet ?

1. Très facilement  2. Plutôt facilement  3. Plutôt difficilement  4. Très difficilement

### C5. Si C4=1 à 3 : Est-ce que vous allez sur Internet pour avoir des informations sur le Coronavirus ?

1. Oui, tous les jours  
 2. Oui, quelques fois par semaine  
 3. Oui, de temps en temps  
 4. Non, jamais

### C6. Etes-vous inquiet qu'un membre de votre cuisine attrape le coronavirus ?

1. Très inquiet  2. Plutôt inquiet  3. Plutôt pas inquiet  4. Pas inquiet du tout

### C7. Avez-vous changé vos habitudes pour éviter que le Coronavirus arrive dans votre cuisine ?

1. Oui  2. Non

### C8. Est-ce que le Chef du village a pris des mesures pour éviter que les habitants attrapent le Coronavirus ?

1. Oui  2. Non

↳ Lesquelles ? \_\_\_\_\_

### C9. Est-ce que le Centre de santé a pris des mesures pour éviter que les habitants attrapent le Coronavirus ?

1. Oui  2. Non

↳ Lesquelles ? \_\_\_\_\_

**C10. Pour vous-même, pensez-vous que votre risque d'attraper le Coronavirus est ?**

- 1. Très faible
- 2. Plutôt faible
- 3. Plutôt élevé
- 4. Très élevé

**C11. Par rapport aux hommes de votre âge, est-ce que vous pensez que votre risque d'attraper le Coronavirus est ?**

- 1. Beaucoup moins importants que pour les autres hommes de mon âge
- 2. Moins importants que pour les autres hommes de mon âge
- 3. Ni plus ni moins importants que pour les autres hommes de mon âge
- 4. Plus importants que pour les autres hommes de mon âge
- 5. Beaucoup plus importants que pour les autres hommes de mon âge

**C13A. Si vous ou un membre de votre famille attrapait le Coronavirus, où iriez-vous pour les soins ?**

- 1. Poste de Santé
- 2. Guérisseur
- 3. Autre ; Préciser \_\_\_\_\_

**C13B. Pensez-vous à un médicament pour soigner le coronavirus ?**

- 1. Oui
- 2. Non

**C13C. Si oui, lequel ?** \_\_\_\_\_.

**C14. En général, craignez-vous d'acheter de faux médicaments ?**

- 1. Oui, tout à fait
- 2. Oui, plutôt
- 3. Non, plutôt pas
- 4. Non, pas du tout

**C15. En général, êtes-vous réticent à l'idée de vous faire vacciner ?**

- 1. Oui, tout à fait
- 2. Oui, plutôt
- 3. Non, plutôt pas
- 4. Non, pas du tout

**C16. Si un vaccin contre le Coronavirus était disponible et gratuit, est-ce que vous voudriez vous faire vacciner ?**

- 1. Oui, certainement
- 2. Oui, probablement
- 3. Non, probablement pas
- 4. Non, certainement pas

**Si C16=3ou4 : C16A. Pour quelles raisons ne vous feriez-vous pas vacciner ?**

- 1. Vous êtes contre la vaccination en général
- 2. Vous pensez qu'un vaccin élaboré dans l'urgence est trop dangereux
- 3. Vous pensez que c'est inutile parce que le COVID-19 est peu dangereux
- 4. Autre : \_\_\_\_\_

**C17. Connaissez-vous des personnes dans votre famille, ou parmi vos amis ou connaissances, qui sont, ou qui ont été malades du Coronavirus ?**

- 1. Oui, dans la famille
- 2. Oui, parmi les amis ou connaissances
- 3. Oui, à la fois dans la famille et parmi les amis ou connaissances
- 3. Non

**C18. Si C17=1,3 : Est-ce qu'il s'agit de personnes qui vivent actuellement avec vous ?**

- 1. Oui
- 2. Non

**C19. Selon vous, est-ce que le couvre-feux dans le bassin de Niakhar est nécessaire pour limiter l'épidémie de Coronavirus ?**

1. Oui, tout à fait  2. Oui, plutôt  3. Non, plutôt pas  4. Non, pas du tout

**C20. Selon vous, est-ce que le couvre-feux dans les villes permet de limiter l'épidémie de Coronavirus ?**

1. Oui, tout à fait  2. Oui, plutôt  3. Non, plutôt pas  4. Non, pas du tout

**C21. Selon vous, qu'est-ce qui est préférable ?**

1. Imposer le couvre-feu seulement dans les zones où il y a des malades du Coronavirus  
 2. Imposer le couvre-feu dans tout le Sénégal pour que tous les citoyens vivent la même chose  
 3. Ne pas imposer de couvre-feu du tout parce qu'il y a très peu de malades au Sénégal

**C22. Selon vous, dans combien de temps est-ce que l'épidémie de Coronavirus sera terminée au Sénégal ? (en mois ou en semaines) ?**    || mois **OU** || semaines

## QUELLE EST VOTRE PERCEPTION DES RISQUES DE CORONAVIRUS ?

### PR1. A quel point la possibilité d'attraper le Coronavirus vous inquiète-t-elle ?

Donnez une note entre 0 et 10 : la note 0 signifie que ça ne vous inquiète pas du tout, et la note 10 que ça vous inquiète énormément.

|   |   |   |   |   |   |   |   |   |   |    |
|---|---|---|---|---|---|---|---|---|---|----|
| 0 | 1 | 2 | 3 | 4 | 5 | 6 | 7 | 8 | 9 | 10 |
|---|---|---|---|---|---|---|---|---|---|----|

### PR2. Selon vous, quelle est la contagiosité du Coronavirus, c'est-à-dire la facilité avec laquelle ce virus peut se transmettre d'une personne à l'autre ?

Donnez une note entre 0 et 10 : la note 0 signifie que ça le Coronavirus est très peu contagieux et la note 10 qu'il est vraiment très contagieux.

|   |   |   |   |   |   |   |   |   |   |    |
|---|---|---|---|---|---|---|---|---|---|----|
| 0 | 1 | 2 | 3 | 4 | 5 | 6 | 7 | 8 | 9 | 10 |
|---|---|---|---|---|---|---|---|---|---|----|

### PR3. Selon vous, quelle est la gravité du Coronavirus ?

Donnez une note entre 0 et 10 : la note 0 signifie qu'attraper le Coronavirus n'est pas du tout grave et la note 10 que c'est vraiment très grave.

|   |   |   |   |   |   |   |   |   |   |    |
|---|---|---|---|---|---|---|---|---|---|----|
| 0 | 1 | 2 | 3 | 4 | 5 | 6 | 7 | 8 | 9 | 10 |
|---|---|---|---|---|---|---|---|---|---|----|

### PR4. Selon vous, sur 100 personnes qui attrapent le Coronavirus, combien d'entre elles pourraient mourir des suites de la maladie ?

Donnez un nombre entre 0 et 100 :            / \_ / \_ / \_ / personnes

## ET POUR LE PALUDISME ?

### PR1BIS. A quel point la possibilité d'attraper le paludisme vous inquiète-t-il ?

Donnez une note entre 0 et 10 : la note 0 signifie que ça ne vous inquiète pas du tout, et la note 10 que ça vous inquiète énormément.

|   |   |   |   |   |   |   |   |   |   |    |
|---|---|---|---|---|---|---|---|---|---|----|
| 0 | 1 | 2 | 3 | 4 | 5 | 6 | 7 | 8 | 9 | 10 |
|---|---|---|---|---|---|---|---|---|---|----|

### PR3BIS. Selon vous, quelle est la gravité du paludisme ?

Donnez une note entre 0 et 10 : la note 0 signifie qu'attraper le paludisme n'est pas du tout grave et la note 10 que c'est vraiment très grave.

|   |   |   |   |   |   |   |   |   |   |    |
|---|---|---|---|---|---|---|---|---|---|----|
| 0 | 1 | 2 | 3 | 4 | 5 | 6 | 7 | 8 | 9 | 10 |
|---|---|---|---|---|---|---|---|---|---|----|

### PR4BIS. Selon vous, sur 100 personnes qui attrapent le paludisme, combien d'entre elles pourraient mourir des suites de la maladie ?

Donnez un nombre entre 0 et 100 :            / \_ / \_ / \_ / personnes

## QUEL IMPACT DU CORONAVIRUS SUR VOTRE CUISINE ?

**IC1. Combien de personnes vivent actuellement dans votre cuisine, y compris vous-même ?**

/\_/\_/\_/ personnes

**IC2. Est-ce que des personnes qui vivent avec vous actuellement sont venus vous rejoindre à cause du Coronavirus ou du couvre-feu ?**

- 1. Oui, à cause du Coronavirus
- 2. Non, pour les récoltes ou le travail de la ferme
- 3. Non, personne n'est venu nous rejoindre → Aller directement à la question IC7

↳ **IC3. Si oui, combien ?** /\_/\_/\_/ personnes

Combien d'adultes ? /\_/\_/\_/ adultes

Combien d'enfants de moins de 15 ans ? /\_/\_/\_/ enfants

**IC4. Quand ces personnes sont arrivées dans votre cuisine, avez-vous craint qu'elles soient malades du Coronavirus sans le savoir ?**

- 1. Oui, tout à fait
- 2. Oui, plutôt
- 3. Non, plutôt pas
- 4. Non, pas du tout

**IC5. Qui sont ces personnes qui sont venus vous rejoindre et sont-elles toujours là ? Les questions suivantes**

**Personne 1 (adulte principal) :**

A. Est-ce qu'il s'agit d'un homme ou d'une femme ?  1. Homme  2. Femme

B. Quel est son âge ? |\_\_|\_\_| ans

C. D'où venait cette personne ? \_\_\_\_\_

D. Quand cette personne est-elle arrivée ? (ou depuis combien de temps est-elle là ?)

Arrivée le |\_\_|\_\_| OU présente depuis |\_\_|\_\_| mois / |\_\_|\_\_| semaines

E. Est-ce que cette personne est étudiante ?

1. Oui  2. Non

F. Est-ce que cette personne avait un travail ou une activité économique avant de vous rejoindre ?

1. Oui  2. Non

↳ F1. Quelle était son activité principale (celle qui lui prend le plus de votre temps) ? \_\_\_\_\_

F2. Est-ce que cette personne aidait la cuisine en envoyant de l'argent ?

1. Oui, régulièrement  2. Oui, quand elle le pouvait  2. Non

G. Est-ce que cette personne est arrivée seule dans votre cuisine ?

1. Oui  2. Non

↳ G1. Combien d'adultes de 15 ans et plus l'accompagnait ?

/\_/\_/

G2. Pour chaque adulte, quel est le lien de parenté avec la

Personne 1 ? \_\_\_\_\_

G3. Combien d'enfants de moins de 15 ans l'accompagnait ?

/\_/\_/

G4. Quel âge ont les enfants ? /\_/\_/ /\_/\_/ .....

**H. Est-ce que d'autres adultes, seuls ou accompagnés de leurs conjoints et enfants, sont venus vous rejoindre ?**

1. Oui  2. Non

**Pour chaque adulte, remplir une nouvelle fiche « Personne 2 » si d'autres sont présents**

**IC6. Est-ce que des personnes qui étaient venues vous rejoindre à cause du Coronavirus sont reparties dans leur vie habituelle ?**

1. Oui  2. Non

↳ Si oui, combien ? /\_/\_/\_/ personnes

.....**Pourquoi sont-elles reparties ?**

1. La menace du Coronavirus était moins forte qu'on l'avait craint

2. Autre : \_\_\_\_\_

**Personne 1 (adulte principal) :**

A. Est-ce qu'il s'agit d'un homme ou d'une femme ?  1. Homme  2. Femme

B. Quel est son âge ? |\_|\_| ans

C. Combien de temps cette personne est-elle restée dans votre cuisine ?

D. Est-ce que cette personne est étudiante ?

1. Oui  2. Non

E. Où est reparti cette personne ? \_\_\_\_\_

F. Pourquoi est-ce que cette personne est repartie ?

1. La menace du Coronavirus était moins forte qu'on l'avait craint

2. Autre : \_\_\_\_\_

F. Est-ce que cette personne a un travail ou une activité économique qu'elle a retrouvé ?

1. Oui  2. Non

↳ F1. Quelle est son activité principale (celle qui lui prend le plus de votre temps) ? \_\_\_\_\_

F2. Actuellement, est-ce que cette personne aide la cuisine en envoyant de l'argent ?

1. Oui, régulièrement  2. Oui, quand elle le peut  2. Non

F2. Est-ce que cette personne aidait d'avantage la cuisine avant le Coronavirus ?

1. Oui  2. Non

G. Est-ce que cette personne est repartie seule ?

1. Oui  2. Non

↳ G1. Combien d'adultes de 15 ans et plus l'accompagnait ?

/\_/\_/

G2. Pour chaque adulte, quel est le lien de parenté avec la  
Personne 1 ? \_\_\_\_\_

G2. Combien d'enfants de moins de 15 ans l'accompagnait ?

/\_/\_/

G3. Quel âge ont les enfants ? /\_/\_/ /\_/\_/ .....

**H. Est-ce que d'autres adultes, seuls ou accompagnés de leurs conjoints et enfants, sont venus vous rejoindre ?**

1. Oui  2. Non

**Pour chaque adulte, remplir une nouvelle fiche « Personne 2 » si d'autres sont présents**

**IC7. Est-ce que la vie dans votre cuisine est plus compliquée à cause du Coronavirus ?**

1. Oui, parce que nous sommes plus nombreux dans la cuisine
2. Oui, parce qu'il est difficile de vendre notre production au marché
3. Oui, parce qu'on a moins d'argent pour acheter ce dont on a besoin
4. Non, parce que nous sommes assez peu nombreux à vivre dans la cuisine
5. Non, parce que nous sommes plus nombreux à travailler
6. Autre : \_\_\_\_\_

**IC8. Avez-vous reçu une aide du gouvernement parce que vous étiez en difficulté à cause du Coronavirus ?**

1. Oui  2. Non

↳ Si oui, ...

**IC9. Avez-vous reçu une aide du maire parce que vous étiez en difficulté à cause du Coronavirus ?**

1. Oui  2. Non

↳ Si oui, de quoi s'agissait-il ? \_\_\_\_\_

**IC10. Avez-vous reçu une aide de personnes de bonne volonté ou de vos voisins parce que vous étiez en difficulté à cause du Coronavirus ?**

1. Oui  2. Non

↳ Si oui, de quoi s'agissait-il ? \_\_\_\_\_

**IC11. Vous-même, avez-vous aidé une autre cuisine qui était en difficulté à cause du Coronavirus ?**

1. Oui  2. Non

↳ Si oui, de quoi s'agissait-il ? \_\_\_\_\_

**IC14. A propos du Coronavirus, on entend beaucoup de choses. Etes-vous d'accord avec les affirmations suivantes ?****IC104A. Le COVID-19, c'est surtout une maladie de blanc.**

1. D'accord  2. Pas d'accord

**IC14B. Le COVID-19, c'est surtout une maladie des villes.**

1. D'accord  2. Pas d'accord

**IC14C. Le COVID-19, c'est juste une grippe.**

1. D'accord  2. Pas d'accord

**IC104D. Le COVID-19, c'est une punition divine.**

1. D'accord  2. Pas d'accord



**IC14E. On peut se protéger ou guérir du COVID-19 en mangeant certains aliments (ail, gingembre, citron vert...).**

1. D'accord       2. Pas d'accord

**IC14F. On peut se protéger ou guérir du COVID-19 grâce à la prière.**

1. D'accord       2. Pas d'accord

**IC104G. On peut se protéger ou guérir du COVID-19 grâce à la médecine traditionnelle.**

1. D'accord       2. Pas d'accord

**IC14H. On peut se protéger ou guérir du COVID-19 grâce à des antibiotiques.**

1. D'accord       2. Pas d'accord

**IC14I. Le COVID-19 se transmet par les moustiques.**

1. D'accord       2. Pas d'accord

**IC14J. Le COVID-19 se transmet par l'air.**

1. D'accord       2. Pas d'accord

**IC14K. Le COVID-19 se transmet par les ondes 5G.**

1. D'accord       2. Pas d'accord

**IC14L. Le COVID-19 disparaît au soleil ou quand il fait chaud.**

1. D'accord       2. Pas d'accord

**POUR TERMINER...**

**D1. Comment vous sentez-vous aujourd'hui, sur une échelle de 0 à 10 (indiquez votre réponse entre 0 (Tout à fait mal) et 10 (Tout à fait bien))**

| Tout à fait mal |   |   |   |   |   |   |   |   |   | Tout à fait bien |  |
|-----------------|---|---|---|---|---|---|---|---|---|------------------|--|
| 0               | 1 | 2 | 3 | 4 | 5 | 6 | 7 | 8 | 9 | 10               |  |

**D2. Quel est votre statut matrimonial ?**

- 1. Marié(e)
- 2. Célibataire
- 3. Veuf(ve)
- 4. Divorcé(e)

**D3. Si vous êtes marié(e), êtes-vous dans une union...**

- 1. Polygame
- 2. Monogame
- 3. Non concerné (non marié)

**D4. Est-ce que votre (première) épouse est inquiète qu'un membre de votre cuisine attrape le coronavirus ?**

- 1. Très inquiète
- 2. Plutôt inquiète
- 3. Plutôt pas inquiète
- 4. Pas inquiète du tout

**D5. Comment votre (première) épouse voit-elle son risque d'attraper le Coronavirus ? Est-ce que pour elle, il est ?**

- 1. Très faible
- 2. Plutôt faible
- 3. Plutôt élevé
- 4. Très élevé

**D6. Par rapport aux femmes de son âge, comment votre (première) épouse voit-elle son risque d'attraper le Coronavirus est :**

- 1. Beaucoup moins importants que pour les autres femmes de son âge
- 2. Moins importants que pour les autres femmes de son âge
- 3. Ni plus ni moins importants que pour les autres femmes de son âge
- 4. Plus importants que pour les autres femmes de son âge
- 5. Beaucoup plus importants que pour les autres femmes de son âge

**D7. Combien d'enfants avez-vous ?** |\_|\_|

**D8. A propos des enfants, êtes-vous d'accord pour qu'ils retournent à l'école ?**

- 1. Oui, tout à fait
- 2. Oui, plutôt
- 3. Non, plutôt pas
- 4. Non, pas du tout

**Si D8=3ou4, Pourquoi ?** \_\_\_\_\_

**D9. Vous-même, êtes-vous allé à l'école publique (quelquefois appelée école « française ») ?**

1. Oui       2. Non

↳ Jusqu'à quelle classe ? \_\_\_\_\_ OU Jusqu'à quel âge ? \_\_\_\_\_ OU Combien d'années ? \_\_\_\_\_

**D10. Êtes-vous allée à l'école coranique ?**

1. Oui       2. Non

↳ Pendant combien d'années ? \_\_\_\_\_

**D11. Quelle est votre activité principale (celle qui vous prend le plus de votre temps) :**  
\_\_\_\_\_**D12. Dans cette activité, vous travaillez comme :** (une seule réponse possible)

1. Fonctionnaire  
 2. Salarié avec un contrat écrit  
 3. Salarié avec un accord oral  
 4. Indépendant à votre compte et sans employé  
 5. Entrepreneur ou patron, avec employé(s)  
 6. Apprenti  
 7. Aide familiale

**D13. Si, au cours des 12 derniers mois, vous n'avez pas travaillé et vous n'avez pas eu d'activité économique, quelle est votre situation actuelle ?**

1. En recherche d'emploi  
 2. Personne âgée ne travaillant plus/ retraité(e)  
 3. Etude/ formation  
 4. Invalidité/ handicap permanent/ longue maladie  
 5. Autre sans occupation (personne au foyer)
