# Supplementary material for: COVID-19-related attitudes, risk perceptions, preventive behaviours and economic impact in sub-Saharan African countries: implementing a longitudinal phone-based survey protocol in rural Senegalese households
Source: PubMed Central journal article supplement — BMJ Open. 2021 Jul 16;11(7):e050090. doi: 10.1136/bmjopen-2021-050090 (PMC8288240; doi:10.1136/bmjopen-2021-050090), 2021-07-16
Supplement: bmjopen-2021-050090supp002.pdf [file bmjopen-2021-050090supp002.pdf]

## Epouse en charge : A PROPOS DU CORONAVIRUS...

### C1. Avez-vous déjà entendu parler du Coronavirus ?

1. Oui  2. Non → **Aller à la question IC1**

### C3. Est-ce que vous allez sur Internet pour avoir des informations sur le Coronavirus ?

1. Oui, tous les jours  
 2. Oui, quelques fois par semaine  
 3. Oui, de temps en temps  
 4. Non, jamais

### C4. Avez-vous acheté des masques au cours des 2 dernières semaines ? (plusieurs réponses possibles)

1. Oui, combien ? \_\_\_\_\_  
 2. Non, on a bénéficié de la distribution de masques  
 2. Non, on en a fabriqué nous-mêmes  
 3. Non et on n'en porte pas

### C5. Avez-vous acheté du gel hydroalcolique au cours des 2 dernières semaines ?

1. Oui  
 2. Non, mais j'aimerais en trouver  
 2. Non et je n'en ressens pas le besoin

### C6. Actuellement, êtes-vous inquiète qu'un membre de votre cuisine attrape le coronavirus ?

1. Très inquiète  2. Plutôt inquiète  3. Plutôt pas inquiète  4. Pas inquiète du tout

### C7. Avez-vous changé vos habitudes pour éviter que le Coronavirus arrive dans votre cuisine ? (plusieurs réponses possibles)

1. Vous n'avez rien changé à vos habitudes  
 2. Chacun doit se laver les mains à chaque fois que vous revenez à la cuisine  
 3. Chacun doit se laver les mains seulement quand vous revenez du marché ou du magasin  
 4. Chacun doit porter un masque pour aller au marché ou au magasin  
 5. Vous utilisez du désinfectant pour nettoyer la cuisine  
 6. Autre : \_\_\_\_\_

### C8. Pour vous-même, pensez-vous que votre risque d'attraper le Coronavirus est ?

1. Très faible  
 2. Plutôt faible  
 3. Plutôt élevé  
 4. Très élevé

### C9. Par rapport aux femmes de votre âge, est-ce que vous pensez que votre risque d'attraper le Coronavirus est ?

1. Beaucoup moins importants que pour les autres femmes de mon âge  
 2. Moins importants que pour les autres femmes de mon âge  
 3. Ni plus ni moins importants que pour les autres femmes de mon âge  
 4. Plus importants que pour les autres femmes de mon âge  
 5. Beaucoup plus importants que pour les autres femmes de mon âge

**C10. Est-ce que des personnes qui vivent avec vous actuellement sont venues vous rejoindre à cause du Coronavirus ?**

1. Oui, à cause du Coronavirus  
 2. Non, pour les récoltes ou le travail de la ferme  
 3. Non, personne n'est venu nous rejoindre

**Si C10=1,2 ou 3 : C10A. Quand ces personnes sont arrivées dans votre cuisine, avez-vous craint que certaines d'entre elles soient malades du Coronavirus sans le savoir ?**

1. Oui, tout à fait  2. Oui, plutôt  3. Non, plutôt pas  4. Non, pas du tout

**C11. Avez-vous pris des précautions pour éviter le Coronavirus dans votre cuisine ?**

1. Oui  2. Non

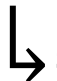

Si oui, lesquelles ? \_\_\_\_\_

**C12. Si vous ou un membre de votre famille attrapait le Coronavirus, où iriez-vous pour les soins ?**

1. Poste de Sante  2. Guérisseur  3. Autre ; Préciser \_\_\_\_\_

**C13. Pensez-vous à un médicament pour soigner le coronavirus ?**

1. Oui  2. Non

**C13A. Si oui, lequel ?** \_\_\_\_\_.

**C14. En général, craignez-vous d'acheter de faux médicaments ?**

1. Oui, tout à fait  2. Oui, plutôt  3. Non, plutôt pas  4. Non, pas du tout

**C15. En général, êtes-vous réticente à l'idée de vous faire vacciner ?**

1. Oui, tout à fait  2. Oui, plutôt  3. Non, plutôt pas  4. Non, pas du tout

**C16. Si un vaccin contre le Coronavirus était disponible et gratuit, est-ce que vous voudriez vous faire vacciner ?**

1. Oui, certainement  2. Oui, probablement  3. Non, probablement pas  4. Non, certainement pas

**Si C16=3ou4 : C16A. Pour quelles raisons ne vous feriez-vous pas vacciner ?**

1. Vous êtes contre la vaccination en général  
 2. Vous pensez qu'un vaccin élaboré dans l'urgence est trop dangereux  
 3. Vous pensez que c'est inutile parce que le COVID-19 est peu dangereux  
 4. Autre : \_\_\_\_\_

**C17. Si un vaccin contre le Coronavirus était disponible et gratuit, est-ce que vous voudriez faire vacciner les enfants ?**

1. Oui, certainement  2. Oui, probablement  3. Non, probablement pas  4. Non, certainement pas

**C18. Connaissez-vous des personnes dans votre famille, ou parmi vos amis ou connaissances, qui sont, ou qui ont été malades du Coronavirus ?**

1. Oui, dans la famille  2. Oui, parmi les amis ou connaissances  
 3. Oui, à la fois dans la famille et parmi les amis ou connaissances  3. Non

**C19. Si C18=1 à 3 ; est-ce qu'il s'agit de personnes qui vivent actuellement avec vous ?**

1. Oui  2. Non

↳ **C19.A. Quel est votre lien de parenté avec cette ou ces personnes ?** \_\_\_\_\_

**C19.B. Avez-vous pris des précautions pour éviter d'être contaminés à votre tour par le Coronavirus ?**

2. Non, et personne l'a attrapé dans la cuisine  
 2. Non, mais une ou plusieurs personnes de la cuisine ont attrapé le Coronavirus  
 1. Oui : Lesquelles ? \_\_\_\_\_

**C19.C. Est-ce que la ou les personnes malades sont allées dans un centre de traitement ?**

1. Oui, toutes sont allées dans un centre de traitement  
 2. Non, certaines ont refusé d'aller dans un centre de traitement  
 2. Non, aucune n'est allée dans un centre de traitement

**C19.D. Est-ce que la ou les personnes malades sont aujourd'hui guéries ?**

1. Oui, toutes  2. Non, certaines ont des séquelles  2. Non, certaines sont décédées

↳ **C19.F. Comment est-ce que cette/ces personnes ont été soignées ?**

1. Toutes par Chloroquine  
 1. Certaines par Chloroquine et d'autres par médecine traditionnelle  
 2. Toutes par médecine traditionnelle  
 3. Autre : \_\_\_\_\_

**C20. Selon vous, est-ce que le couvre-feu dans le bassin de Niakhar est nécessaire pour limiter l'épidémie de Coronavirus ?**

1. Oui, tout à fait  2. Oui, plutôt  3. Non, plutôt pas  4. Non, pas du tout

**C21. Selon vous, est-ce que le couvre-feu dans les villes permet de limiter l'épidémie de Coronavirus ?**

1. Oui, tout à fait  2. Oui, plutôt  3. Non, plutôt pas  4. Non, pas du tout

**C22. Selon vous, qu'est-ce qui est préférable ?**

1. Imposer le couvre-feu seulement dans les zones où il y a des malades du Coronavirus  
 2. Imposer le couvre-feu dans tout le Sénégal pour que tous les citoyens vivent la même chose  
 3. Ne pas imposer de couvre-feu du tout parce qu'il y a peu de malades au Sénégal

**C23. Selon vous, dans combien de temps est-ce que l'épidémie de Coronavirus sera terminée au Sénégal ? (en mois ou en semaines)**

|\_|\_| mois **OU** |\_|\_| semaines

## QUELLE EST VOTRE PERCEPTION DES RISQUES DE CORONAVIRUS ?

### PR1. A quel point la possibilité d'attraper le Coronavirus vous inquiète-t-elle ?

Donnez une note entre 0 et 10 : la note 0 signifie que ça ne vous inquiète pas du tout, et la note 10 que ça vous inquiète énormément.

|   |   |   |   |   |   |   |   |   |   |    |
|---|---|---|---|---|---|---|---|---|---|----|
| 0 | 1 | 2 | 3 | 4 | 5 | 6 | 7 | 8 | 9 | 10 |
|---|---|---|---|---|---|---|---|---|---|----|

### PR2. Selon vous, quelle est la contagiosité du Coronavirus, c'est-à-dire la facilité avec laquelle ce virus peut se transmettre d'une personne à l'autre ?

Donnez une note entre 0 et 10 : la note 0 signifie que ça le Coronavirus est très peu contagieux et la note 10 qu'il est vraiment très contagieux.

|   |   |   |   |   |   |   |   |   |   |    |
|---|---|---|---|---|---|---|---|---|---|----|
| 0 | 1 | 2 | 3 | 4 | 5 | 6 | 7 | 8 | 9 | 10 |
|---|---|---|---|---|---|---|---|---|---|----|

### PR3. Selon vous, quelle est la gravité du Coronavirus ?

Donnez une note entre 0 et 10 : la note 0 signifie qu'attraper le Coronavirus n'est pas du tout grave et la note 10 que c'est vraiment très grave.

|   |   |   |   |   |   |   |   |   |   |    |
|---|---|---|---|---|---|---|---|---|---|----|
| 0 | 1 | 2 | 3 | 4 | 5 | 6 | 7 | 8 | 9 | 10 |
|---|---|---|---|---|---|---|---|---|---|----|

### PR4. Selon vous, sur 100 personnes qui attrapent le Coronavirus, combien d'entre elles pourraient mourir des suites de la maladie ?

Donnez un nombre entre 0 et 100 :

/ \_ / \_ / \_ / \_ / personnes

## ET POUR LE PALUDISME ?

### PR1BIS. A quel point la possibilité d'attraper le paludisme vous inquiète-t-il ?

Donnez une note entre 0 et 10 : la note 0 signifie que ça ne vous inquiète pas du tout, et la note 10 que ça vous inquiète énormément.

|   |   |   |   |   |   |   |   |   |   |    |
|---|---|---|---|---|---|---|---|---|---|----|
| 0 | 1 | 2 | 3 | 4 | 5 | 6 | 7 | 8 | 9 | 10 |
|---|---|---|---|---|---|---|---|---|---|----|

### PR3BIS. Selon vous, quelle est la gravité du paludisme ?

Donnez une note entre 0 et 10 : la note 0 signifie qu'attraper le paludisme n'est pas du tout grave et la note 10 que c'est vraiment très grave.

|   |   |   |   |   |   |   |   |   |   |    |
|---|---|---|---|---|---|---|---|---|---|----|
| 0 | 1 | 2 | 3 | 4 | 5 | 6 | 7 | 8 | 9 | 10 |
|---|---|---|---|---|---|---|---|---|---|----|

### PR4BIS. Selon vous, sur 100 personnes qui attrapent le paludisme, combien d'entre elles pourraient mourir des suites de la maladie ?

Donnez un nombre entre 0 et 100 :

/ \_ / \_ / \_ / \_ / personnes

## QUEL IMPACT DU CORONAVIRUS SUR VOTRE CUISINE ?

### IC1. Comment évaluez-vous l'impact de l'épidémie de Coronavirus sur votre vie personnelle en général ?

- 1. C'est très négatif
- 2. Il y a plus de mauvais que du bon
- 3. En fait, ça ne change pas grand chose par rapport à ma vie d'avant
- 4. Il y a plus de bon que de mauvais
- 5. C'est très positif

### IC2. Comment évaluez-vous l'impact de l'épidémie de Coronavirus sur la cuisine ?

- 1. C'est très négatif
- 2. Il y a plus de mauvais que du bon
- 3. En fait, ça ne change pas grand chose par rapport à avant
- 4. Il y a plus de bon que de mauvais
- 5. C'est très positif

### IC3. Est-ce qu'à cause du couvre-feu, il est plus difficile qu'avant d'acheter ce dont vous avez besoin ?

- 1. Oui, parce que les prix ont augmenté
- 2. Oui, parce qu'on trouve plus difficilement ce qu'on cherche
- 3. Oui, pour d'autres raisons ; Lesquelles : \_\_\_\_\_
- 4. Non

### IC4. Est-ce qu'à cause du couvre-feu, il est plus difficile qu'avant de vendre votre production ?

- 1. Oui, parce que les gros marchés sont fermés
- 1. Oui, parce que vous n'arrivez pas à vendre vos produits au prix qu'ils devraient avoir
- 3. Oui, pour d'autres raisons ; Lesquelles : \_\_\_\_\_
- 4. Non

### IC5. Actuellement, est-ce que c'est compliqué de nourrir tout le monde dans la cuisine ?

- 1. Oui, tout à fait
- 2. Oui, plutôt
- 3. Non, plutôt pas
- 4. Non, pas du tout

### IC6. Si IC3=1à 3 : Selon vous, est-ce que vous avez ces difficultés à cause du Coronavirus ?

- 1. Oui, tout à fait
- 2. Oui, plutôt
- 3. Non, plutôt pas
- 4. Non, pas du tout

### IC7. On entend beaucoup de choses à propos du Coronavirus. Etes-vous d'accord avec les affirmations suivantes ?

#### IC7A. Le COVID-19, c'est surtout une maladie de blanc.

- 1. D'accord
- 2. Pas d'accord

#### IC7B. Le COVID-19, c'est surtout une maladie des villes.

- 1. D'accord
- 2. Pas d'accord

#### IC7C. Le COVID-19, c'est juste une grippe.

- 1. D'accord
- 2. Pas d'accord

#### IC7D. Le COVID-19, c'est une punition divine.

- 1. D'accord
- 2. Pas d'accord

#### IC7E. On peut se protéger ou guérir du COVID-19 en mangeant certains aliments (ail, gingembre ...).

- 1. D'accord
- 2. Pas d'accord

#### IC7F. On peut se protéger ou guérir du COVID-19 grâce à la prière.

- 1. D'accord
- 2. Pas d'accord

**IC7G. On peut se protéger ou guérir du COVID-19 grâce à la médecine traditionnelle.**

1. D'accord       2. Pas d'accord

**IC7H. On peut se protéger ou guérir du COVID-19 grâce à des antibiotiques.**

1. D'accord       2. Pas d'accord

**IC7I. Le COVID-19 se transmet par les moustiques.**

1. D'accord       2. Pas d'accord

**IC7J. Le COVID-19 se transmet par l'air.**

1. D'accord       2. Pas d'accord

**IC7K. Le COVID-19 se transmet par les ondes 5G.**

1. D'accord       2. Pas d'accord

**IC7L. Le COVID-19 disparaît au soleil ou quand il fait chaud.**

1. D'accord       2. Pas d'accord

## POUR TERMINER...

**D1. Comment vous sentez-vous aujourd'hui, sur une échelle de 0 à 10 (indiquez votre réponse entre 0 (Tout à fait mal) et 10 (Tout à fait bien))**

| Tout à fait mal |   |   |   |   |   |   |   |   |   |    | Tout à fait bien |
|-----------------|---|---|---|---|---|---|---|---|---|----|------------------|
| 0               | 1 | 2 | 3 | 4 | 5 | 6 | 7 | 8 | 9 | 10 |                  |

**D2. Est-ce que votre mari est inquiet qu'un membre de votre cuisine attrape le Coronavirus ?**

1. Très inquiet     2. Plutôt inquiet     3. Plutôt pas inquiet     4. Pas inquiet du tout

**D3. Comment votre mari voit-il son risque d'attraper le Coronavirus ? Est-ce que pour lui, son risque est ?**

1. Très faible  
 2. Plutôt faible  
 3. Plutôt élevé  
 4. Très élevé

**D4. Par rapport aux hommes de son âge, comment votre mari voit-il son risque d'attraper le Coronavirus ? Est-ce que pour lui, son risque est ?**

1. Beaucoup moins importants que pour les autres hommes de son âge  
 2. Moins importants que pour les autres hommes de son âge  
 3. Ni plus ni moins importants que pour les autres hommes de son âge  
 4. Plus importants que pour les autres hommes de son âge  
 5. Beaucoup plus importants que pour les autres hommes de son âge

**D5. A propos des enfants, êtes-vous d'accord pour qu'ils retournent à l'école ?**

1. Oui, tout à fait     2. Oui, plutôt     3. Non, plutôt pas     4. Non, pas du tout

**Si D5=3ou4, Pourquoi ?** \_\_\_\_\_

**D6. Vous-même, êtes-vous allée à l'école publique (quelquefois appelée école « française ») ?**

1. Oui     2. Non

↳ **Jusqu'à quelle classe ?** \_\_\_\_\_ **OU** **Jusqu'à quel âge ?** \_\_\_\_\_ **OU** **Combien d'années ?** \_\_\_\_\_

**D7. Etes-vous allée à l'école coranique ?**

1. Oui     2. Non

↳ **Pendant combien d'années ?** \_\_\_\_\_
