# Supplementary material for: COVID-19-related attitudes, risk perceptions, preventive behaviours and economic impact in sub-Saharan African countries: implementing a longitudinal phone-based survey protocol in rural Senegalese households
Source: PubMed Central journal article supplement — BMJ Open. 2021 Jul 16;11(7):e050090. doi: 10.1136/bmjopen-2021-050090 (PMC8288240; doi:10.1136/bmjopen-2021-050090), 2021-07-16
Supplement: bmjopen-2021-050090supp003.pdf [file bmjopen-2021-050090supp003.pdf]

## Nouvel arrivant : A PROPOS DU CORONAVIRUS...

### C1. Confirmez-vous que vous vivez actuellement dans la cuisine à cause du Coronavirus ?

1. Oui  2. Non

↳ C1A. Quelle est la principale raison qui vous a poussé(e) à rejoindre la cuisine ?

1. La peur d'attraper le Coronavirus  
 2. La peur de ne plus gagner assez d'argent pour vivre  
.... 3. Autre : \_\_\_\_\_

### C2. Etes-vous étudiant ?

1. Oui  2. Non

↳ C2A. Quelle est la principale raison qui vous a poussé(e) à rejoindre la cuisine ?

1. La peur d'attraper le Coronavirus  
 2. La peur de ne plus gagner assez d'argent pour vivre  
.... 3. Autre : \_\_\_\_\_

Si C1=2 et C2=2, alors STOP.

### C3. Est-ce que vous allez sur Internet pour avoir des informations sur le Coronavirus ?

1. Oui, tous les jours  
 2. Oui, quelques fois par semaine  
 3. Oui, de temps en temps  
 4. Non, jamais

### C4. Quand vous êtes arrivé(e) dans la cuisine, est-ce que vous aviez-vous peur d'être malade du Coronavirus sans le savoir ?

1. Oui, tout à fait  2. Oui, plutôt  3. Non, plutôt pas  4. Non, pas du tout

### C5. A votre arrivée, est-ce que des précautions ont été prises pour éviter le Coronavirus ?

1. Oui  2. Non

↳ C5.A. Est-ce que vous dormiez à l'écart des autres membres de la famille ?

1. Oui  2. Non

C5.B. Est-ce que vous preniez vos repas à l'écart des autres membres de la famille ?

1. Oui  2. Non

C5.C. Au bout de combien de temps avez-vous pu vous joindre au reste de la famille ?

/\_/\_/\_/ jours

C5.D. Est-ce que cette expérience a été difficile ?

1. Oui, tout à fait  2. Oui, plutôt  3. Non, plutôt pas  4. Non, pas du tout

**C6. Actuellement, êtes-vous inquiet qu'un membre de la cuisine attrape le coronavirus ?**

1. Très inquiet     2. Plutôt inquiet     3. Plutôt pas inquiet     4. Pas inquiet du tout

**C7. Pour vous-même, pensez-vous que votre risque d'attraper le Coronavirus est ?**

1. Très faible  
 2. Plutôt faible  
 3. Plutôt élevé  
 4. Très élevé

**C8. Par rapport aux hommes/femmes de votre âge, est-ce que vous pensez que votre risque d'attraper le Coronavirus est :**

1. Beaucoup moins importants que pour les autres hommes/femmes de mon âge  
 2. Moins importants que pour les autres hommes/femmes de mon âge  
 3. Ni plus ni moins importants que pour les autres hommes/femmes de mon âge  
 4. Plus importants que pour les autres hommes/femmes de mon âge  
 5. Beaucoup plus importants que pour les autres hommes/femmes de mon âge

**C9. Si vous ou un membre de votre famille attrapait le Coronavirus, où iriez-vous pour les soins ?**

1. Poste de Santé     2. Guérisseur     3. Autre ; Préciser \_\_\_\_\_

**C10. Pensez-vous à un médicament pour soigner le coronavirus ?**

1. Oui     2. Non

**C10A. Si oui, lequel ? \_\_\_\_\_.**

**C11. En général, craignez-vous d'acheter de faux médicaments ?**

1. Oui, tout à fait     2. Oui, plutôt     3. Non, plutôt pas     4. Non, pas du tout

**C12. En général, êtes-vous réticent(e) à l'idée de vous faire vacciner ?**

1. Oui, tout à fait     2. Oui, plutôt     3. Non, plutôt pas     4. Non, pas du tout

**C13. Si un vaccin contre le Coronavirus était disponible et gratuit, est-ce que vous voudriez vous faire vacciner ?**

1. Oui, certainement     2. Oui, probablement     3. Non, probablement pas     4. Non, certainement pas

**Si C16=3ou4 : C16A. Pour quelles raisons ne vous feriez-vous pas vacciner ?**

1. Vous êtes contre la vaccination en général  
 2. Vous pensez qu'un vaccin élaboré dans l'urgence est trop dangereux  
 3. Vous pensez que c'est inutile parce que le COVID-19 est peu dangereux  
 4. Autre : \_\_\_\_\_

**C14. Si un vaccin contre le Coronavirus était disponible et gratuit, est-ce que vous voudriez faire vacciner vos enfants ?**

1. Oui, certainement     2. Oui, probablement     3. Non, probablement pas     4. Non, certainement pas

**C16. Connaissez-vous des personnes dans votre famille, ou parmi vos amis ou connaissances, qui sont, ou qui ont été malades du Coronavirus ?**

1. Oui, dans la famille     2. Oui, parmi les amis ou connaissances  
 3. Oui, à la fois dans la famille et parmi les amis ou connaissances     3. Non

**C17. Selon vous, est-ce que le couvre-feu dans le bassin de Niakhar est nécessaire pour limiter l'épidémie de Coronavirus?**

1. Oui, tout à fait     2. Oui, plutôt     3. Non, plutôt pas     4. Non, pas du tout

**C18. Selon vous, est-ce que le couvre-feu dans les villes permet de limiter l'épidémie de Coronavirus ?**

1. Oui, tout à fait     2. Oui, plutôt     3. Non, plutôt pas     4. Non, pas du tout

**C19. Selon vous, qu'est-ce qui est préférable ?**

1. Imposer le couvre-feu seulement dans les zones où il y a des malades du Coronavirus  
 2. Imposer le couvre-feu dans tout le Sénégal pour que tous les citoyens vivent la même chose  
 3. Ne pas imposer de couvre-feu du tout parce qu'il y a peu de malades au Sénégal

**C20. Selon vous, dans combien de temps est-ce que l'épidémie de Coronavirus sera terminée ?  
(en mois ou en semaines)**

|\_|\_| mois **OU** |\_|\_| semaines

## QUELLE EST VOTRE PERCEPTION DES RISQUES DE CORONAVIRUS ?

### PR1. A quel point la possibilité d'attraper le Coronavirus vous inquiète-t-elle ?

Donnez une note entre 0 et 10 : la note 0 signifie que ça ne vous inquiète pas du tout, et la note 10 que ça vous inquiète énormément.

|   |   |   |   |   |   |   |   |   |   |    |
|---|---|---|---|---|---|---|---|---|---|----|
| 0 | 1 | 2 | 3 | 4 | 5 | 6 | 7 | 8 | 9 | 10 |
|---|---|---|---|---|---|---|---|---|---|----|

### PR2. Selon vous, quelle est la contagiosité du Coronavirus, c'est-à-dire la facilité avec laquelle ce virus peut se transmettre d'une personne à l'autre ?

Donnez une note entre 0 et 10 : la note 0 signifie que ça le Coronavirus est très peu contagieux et la note 10 qu'il est vraiment très contagieux.

|   |   |   |   |   |   |   |   |   |   |    |
|---|---|---|---|---|---|---|---|---|---|----|
| 0 | 1 | 2 | 3 | 4 | 5 | 6 | 7 | 8 | 9 | 10 |
|---|---|---|---|---|---|---|---|---|---|----|

### PR3. Selon vous, quelle est la gravité du Coronavirus ?

Donnez une note entre 0 et 10 : la note 0 signifie qu'attraper le Coronavirus n'est pas du tout grave et la note 10 que c'est vraiment très grave.

|   |   |   |   |   |   |   |   |   |   |    |
|---|---|---|---|---|---|---|---|---|---|----|
| 0 | 1 | 2 | 3 | 4 | 5 | 6 | 7 | 8 | 9 | 10 |
|---|---|---|---|---|---|---|---|---|---|----|

### PR4. Selon vous, sur 100 personnes qui attrapent le Coronavirus, combien d'entre elles pourraient mourir des suites de la maladie ?

Donnez un nombre entre 0 et 100 :            / \_ / \_ / \_ / personnes

## ET POUR LE PALUDISME ?

### PR1BIS. A quel point la possibilité d'attraper le paludisme vous inquiète-t-il ?

Donnez une note entre 0 et 10 : la note 0 signifie que ça ne vous inquiète pas du tout, et la note 10 que ça vous inquiète énormément.

|   |   |   |   |   |   |   |   |   |   |    |
|---|---|---|---|---|---|---|---|---|---|----|
| 0 | 1 | 2 | 3 | 4 | 5 | 6 | 7 | 8 | 9 | 10 |
|---|---|---|---|---|---|---|---|---|---|----|

### PR3BIS. Selon vous, quelle est la gravité du paludisme ?

Donnez une note entre 0 et 10 : la note 0 signifie qu'attraper le paludisme n'est pas du tout grave et la note 10 que c'est vraiment très grave.

|   |   |   |   |   |   |   |   |   |   |    |
|---|---|---|---|---|---|---|---|---|---|----|
| 0 | 1 | 2 | 3 | 4 | 5 | 6 | 7 | 8 | 9 | 10 |
|---|---|---|---|---|---|---|---|---|---|----|

### PR4BIS. Selon vous, sur 100 personnes qui attrapent le paludisme, combien d'entre elles pourraient mourir des suites de la maladie ?

Donnez un nombre entre 0 et 100 :            / \_ / \_ / \_ / personnes

**D1. Comment évaluez-vous l'impact de l'épidémie de Coronavirus sur votre vie personnelle en général ?**

- 1. C'est très négatif
- 2. Il y a plus de mauvais que du bon
- 3. En fait, ça ne change pas grand chose par rapport à ma vie d'avant
- 4. Il y a plus de bon que de mauvais
- 5. C'est très positif

**D2. Comment évaluez-vous l'impact de l'épidémie de Coronavirus sur la cuisine ?**

- 1. C'est très négatif
- 2. Il y a plus de mauvais que du bon
- 3. En fait, ça ne change pas grand chose par rapport à avant
- 4. Il y a plus de bon que de mauvais
- 5. C'est très positif

**D3. A propos du Coronavirus, on entend beaucoup de choses. Etes-vous d'accord avec les affirmations suivantes ?****D3A. Le COVID-19, c'est surtout une maladie de blanc.**

- 1. D'accord
- 2. Pas d'accord

**D3B. Le COVID-19, c'est surtout une maladie des villes.**

- 1. D'accord
- 2. Pas d'accord

**D3C. Le COVID-19, c'est juste une grippe.**

- 1. D'accord
- 2. Pas d'accord

**D3D. Le COVID-19, c'est une punition divine.**

- 1. D'accord
- 2. Pas d'accord

**D3E. On peut se protéger ou guérir du COVID-19 en mangeant certains aliments (ail, gingembre, citron vert...).**

- 1. D'accord
- 2. Pas d'accord

**D3F. On peut se protéger ou guérir du COVID-19 grâce à la prière.**

- 1. D'accord
- 2. Pas d'accord

**D3G. On peut se protéger ou guérir du COVID-19 grâce à la médecine traditionnelle.**

- 1. D'accord
- 2. Pas d'accord

**D3H. On peut se protéger ou guérir du COVID-19 grâce à des antibiotiques.**

- 1. D'accord
- 2. Pas d'accord

**D3I. Le COVID-19 se transmet par les moustiques.**

- 1. D'accord
- 2. Pas d'accord

**D3J. Le COVID-19 se transmet par l'air.**

- 1. D'accord
- 2. Pas d'accord

**D3K. Le COVID-19 se transmet par les ondes 5G.**

- 1. D'accord
- 2. Pas d'accord

**D3L. Le COVID-19 disparaît au soleil ou quand il fait chaud.**

- 1. D'accord
- 2. Pas d'accord

## POUR TERMINER...

**D1. Comment vous sentez-vous aujourd'hui, sur une échelle de 0 à 10 (indiquez votre réponse entre 0 (Tout à fait mal) et 10 (Tout à fait bien))**

| Tout à fait mal |   |   |   |   |   |   |   |   |   |    |  | Tout à fait bien |  |
|-----------------|---|---|---|---|---|---|---|---|---|----|--|------------------|--|
| 0               | 1 | 2 | 3 | 4 | 5 | 6 | 7 | 8 | 9 | 10 |  |                  |  |

**D2. Selon vous, est-ce que le chef de ménage et sa (première) épouse sont inquiets qu'un membre de la cuisine attrape le Coronavirus ?**

1. Très inquiets     2. Plutôt inquiets     3. Plutôt pas inquiets     4. Pas inquiets du tout

**D3. Quel est votre statut matrimonial ?**

1. Marié(e)  
 2. Célibataire  
 3. Veuf(ve)  
 4. Divorcé(e)

**D4. Si vous êtes marié(e), êtes-vous dans une union...**

1. Polygame  
 2. Monogame  
 3. Non concerné (non marié)

**D5. Avez-vous des enfants ?**

1. Oui     2. Non

**D6. Si D4=1 : Combien ? \_\_\_\_\_ de quel(s) âge(s) ? \_\_\_\_\_**

**D7. Quelle est votre activité principale (celle qui vous prend le plus de votre temps) : \_\_\_\_\_**

**D8. Dans cette activité, vous travaillez comme : (une seule réponse possible)**

1. Fonctionnaire  
 2. Salarié avec un contrat écrit  
 3. Salarié avec un accord oral  
 4. Indépendant à votre compte et sans employé  
 5. Entrepreneur ou patron, avec employé(s)  
 6. Apprenti  
 7. Aide familiale

**D9. Est-ce que votre activité est dans le secteur ?**

1. Des transports  
 2. De la pêche  
 3. Du tourisme  
 3. Non, un autre secteur

**D10. Si, au cours des 12 derniers mois, vous n'avez pas travaillé et vous n'avez pas eu d'activité économique, quelle est votre situation actuelle ?**

1. En recherche d'emploi  
 2. Personne âgée ne travaillant plus/ retraité(e)  
 3. Etude/ formation  
 4. Invalidité/ handicap permanent/ longue maladie  
 5. Autre sans occupation (personne au foyer)
